# Supplementary material
Source: publisher figshare collection journal article supplement (https://acs.figshare.com/ndownloader/files/4681567)
Supplement: Supplementary file 1 [file 4681567]

 
data_55Me2bpyReC2Ph 
 
_audit_creation_method            SHELXL-97 
_chemical_name_systematic 
; 
 ? 
; 
_chemical_name_common             ? 
_chemical_melting_point           ? 
_chemical_formula_moiety          ? 
_chemical_formula_sum 
 'C24.50 H20 N2 O3.50 Re' 
_chemical_formula_weight          584.63 
 
loop_ 
 _atom_type_symbol 
 _atom_type_description 
 _atom_type_scat_dispersion_real 
 _atom_type_scat_dispersion_imag 
 _atom_type_scat_source 
 'C'  'C'   0.0181   0.0091 
 'International Tables Vol C Tables 4.2.6.8 and 6.1.1.4' 
 'H'  'H'   0.0000   0.0000 
 'International Tables Vol C Tables 4.2.6.8 and 6.1.1.4' 
 'N'  'N'   0.0311   0.0180 
 'International Tables Vol C Tables 4.2.6.8 and 6.1.1.4' 
 'O'  'O'   0.0492   0.0322 
 'International Tables Vol C Tables 4.2.6.8 and 6.1.1.4' 
 'Re'  'Re'  -5.2083   5.8923 
 'International Tables Vol C Tables 4.2.6.8 and 6.1.1.4' 
 
_symmetry_cell_setting            'triclinic' 
_symmetry_space_group_name_H-M    'P -1' 
 
loop_ 
 _symmetry_equiv_pos_as_xyz 
 'x, y, z' 
 '-x, -y, -z' 
 
_cell_length_a                    10.4542(5) 
_cell_length_b                    11.2095(6) 
_cell_length_c                    19.9781(11) 
_cell_angle_alpha                 77.721(3) 
_cell_angle_beta                  82.260(2) 
_cell_angle_gamma                 73.989(3) 
_cell_volume                      2191.7(2) 
_cell_formula_units_Z             4 
_cell_measurement_temperature     100(2) 
_cell_measurement_reflns_used     6451 
_cell_measurement_theta_min       2 
_cell_measurement_theta_max       61 
 
_exptl_crystal_description        'plate' 
_exptl_crystal_colour             'yellow' 
_exptl_crystal_size_max           0.22 
_exptl_crystal_size_mid           0.17 
_exptl_crystal_size_min           0.05 
_exptl_crystal_density_meas       ? 
_exptl_crystal_density_diffrn     1.772 
_exptl_crystal_density_method     'not measured' 
_exptl_crystal_F_000              1136 
_exptl_absorpt_coefficient_mu     11.101 
_exptl_absorpt_correction_type    multi-scan 
_exptl_absorpt_correction_T_min   0.1938 
_exptl_absorpt_correction_T_max   0.6068 
_exptl_absorpt_process_details    ? 
 
_exptl_special_details 
; 
 ? 
; 
 
_diffrn_ambient_temperature       100(2) 
_diffrn_radiation_wavelength      1.54178 
_diffrn_radiation_type            CuK\a 
_diffrn_radiation_source          'fine-focus sealed tube' 
_diffrn_radiation_monochromator   graphite 
_diffrn_measurement_device_type   'Bruker APEX2 CCD detector' 
_diffrn_measurement_method        '\w scans' 
_diffrn_detector_area_resol_mean  ? 
_diffrn_standards_number          ? 
_diffrn_standards_interval_count  ? 
_diffrn_standards_interval_time   ? 
_diffrn_standards_decay_%         ? 
_diffrn_reflns_number             18290
_diffrn_reflns_av_R_equivalents   0.0285 
_diffrn_reflns_av_sigmaI/netI     0.0255 
_diffrn_reflns_limit_h_min        -11 
_diffrn_reflns_limit_h_max        11 
_diffrn_reflns_limit_k_min        -12 
_diffrn_reflns_limit_k_max        12 
_diffrn_reflns_limit_l_min        0 
_diffrn_reflns_limit_l_max        22 
_diffrn_reflns_theta_min          2.27 
_diffrn_reflns_theta_max          61.57 
_reflns_number_total              6445 
_reflns_number_gt                 6172 
_reflns_threshold_expression      >2sigma(I) 
 
_computing_data_collection        'APEX2 v2.0-2 (Bruker, 2005)' 
_computing_cell_refinement        'SAINT v7.23A (Bruker, 2005)' 
_computing_data_reduction         'SADABS-2004/1 (Bruker, 2005)' 
_computing_structure_solution     'XS/SHELXTL v6.12 (Bruker, 2001)' 
_computing_structure_refinement   'SHELXL-97 v.97-2 (Sheldrick, 1993-1997)' 
_computing_molecular_graphics     'XP v5.1 (Bruker, 1998)' 
_computing_publication_material   'XCIF v6.12 (Bruker, 2001)' 
 
_refine_special_details 
; 
 Refinement of F^2^ against ALL reflections.  The weighted R-factor wR and 
 goodness of fit S are based on F^2^, conventional R-factors R are based 
 on F, with F set to zero for negative F^2^. The threshold expression of 
 F^2^ > 2sigma(F^2^) is used only for calculating R-factors(gt) etc. and is 
 not relevant to the choice of reflections for refinement.  R-factors based 
 on F^2^ are statistically about twice as large as those based on F, and R- 
 factors based on ALL data will be even larger. 
; 
 
_refine_ls_structure_factor_coef  Fsqd  
_refine_ls_matrix_type            full 
_refine_ls_weighting_scheme       calc  
_refine_ls_weighting_details 
 'calc w=1/[\s^2^(Fo^2^)+(0.0201P)^2^+1.9557P] where P=(Fo^2^+2Fc^2^)/3' 
_atom_sites_solution_primary      direct 
_atom_sites_solution_secondary    difmap 
_atom_sites_solution_hydrogens    difmap
_refine_ls_hydrogen_treatment     refall 
_refine_ls_extinction_method      SHELXL 
_refine_ls_extinction_coef        0.000171(16) 
_refine_ls_extinction_expression 
 'Fc^*^=kFc[1+0.001xFc^2^\l^3^/sin(2\q)]^-1/4^' 
_refine_ls_number_reflns          6445 
_refine_ls_number_parameters      720 
_refine_ls_number_restraints      0 
_refine_ls_R_factor_all           0.0206 
_refine_ls_R_factor_gt            0.0193 
_refine_ls_wR_factor_ref          0.0484 
_refine_ls_wR_factor_gt           0.0477 
_refine_ls_goodness_of_fit_ref    1.119 
_refine_ls_restrained_S_all       1.119 
_refine_ls_shift/su_max           0.030 
_refine_ls_shift/su_mean          0.001 
 
loop_ 
 _atom_site_label 
 _atom_site_type_symbol 
 _atom_site_fract_x 
 _atom_site_fract_y 
 _atom_site_fract_z 
 _atom_site_U_iso_or_equiv 
 _atom_site_adp_type 
 _atom_site_occupancy 
 _atom_site_symmetry_multiplicity 
 _atom_site_calc_flag 
 _atom_site_refinement_flags 
 _atom_site_disorder_assembly 
 _atom_site_disorder_group 
Re1 Re 0.561792(13) 0.064536(12) 0.138597(7) 0.01552(6) Uani 1 1 d . . . 
O1 O 0.3338(3) 0.1845(3) 0.23732(14) 0.0409(7) Uani 1 1 d . . . 
O2 O 0.3949(2) 0.2206(2) 0.01953(13) 0.0317(6) Uani 1 1 d . . . 
O3 O 0.4512(2) -0.1678(2) 0.14267(13) 0.0292(6) Uani 1 1 d . . . 
N1 N 0.7386(3) -0.0218(2) 0.07790(14) 0.0165(6) Uani 1 1 d . . . 
N2 N 0.7058(3) -0.0426(2) 0.21323(13) 0.0164(6) Uani 1 1 d . . . 
C1 C 0.4185(4) 0.1382(3) 0.20083(19) 0.0255(8) Uani 1 1 d . . . 
C2 C 0.4557(3) 0.1615(3) 0.06469(18) 0.0208(7) Uani 1 1 d . . . 
C3 C 0.4901(3) -0.0807(3) 0.14177(17) 0.0211(7) Uani 1 1 d . . . 
C4 C 0.6619(3) 0.2100(3) 0.13085(17) 0.0209(7) Uani 1 1 d . . . 
C5 C 0.7274(3) 0.2857(3) 0.12330(17) 0.0218(7) Uani 1 1 d . . . 
C11 C 0.8455(3) -0.0926(3) 0.11257(17) 0.0172(7) Uani 1 1 d . . . 
C12 C 0.9615(3) -0.1520(3) 0.07724(18) 0.0199(7) Uani 1 1 d . . . 
C13 C 0.9680(3) -0.1385(3) 0.00704(18) 0.0197(7) Uani 1 1 d . . . 
C14 C 0.8600(3) -0.0639(3) -0.02894(17) 0.0199(7) Uani 1 1 d . . . 
C15 C 0.7478(3) -0.0083(3) 0.00933(17) 0.0184(7) Uani 1 1 d . . . 
C16 C 0.8611(4) -0.0409(4) -0.10560(19) 0.0236(8) Uani 1 1 d . . . 
C21 C 0.8286(3) -0.1015(3) 0.18778(17) 0.0187(7) Uani 1 1 d . . . 
C22 C 0.9286(3) -0.1644(3) 0.23132(17) 0.0193(7) Uani 1 1 d . . . 
C23 C 0.9020(4) -0.1707(3) 0.30155(19) 0.0224(8) Uani 1 1 d . . . 
C24 C 0.7751(3) -0.1128(3) 0.32843(17) 0.0193(7) Uani 1 1 d . . . 
C25 C 0.6821(4) -0.0495(3) 0.28152(18) 0.0193(7) Uani 1 1 d . . . 
C26 C 0.7407(4) -0.1172(4) 0.40396(18) 0.0246(8) Uani 1 1 d . . . 
C31 C 0.8123(3) 0.3715(3) 0.11363(16) 0.0201(7) Uani 1 1 d . . . 
C32 C 0.9380(3) 0.3322(3) 0.13963(18) 0.0233(8) Uani 1 1 d . . . 
C33 C 1.0239(4) 0.4104(3) 0.12715(19) 0.0264(8) Uani 1 1 d . . . 
C34 C 0.9838(4) 0.5320(3) 0.08938(19) 0.0269(8) Uani 1 1 d . . . 
C35 C 0.8579(4) 0.5732(3) 0.06510(19) 0.0260(8) Uani 1 1 d . . . 
C36 C 0.7734(4) 0.4948(3) 0.07614(17) 0.0231(8) Uani 1 1 d . . . 
Re2 Re 0.286877(12) 0.838317(12) 0.401710(7) 0.01297(6) Uani 1 1 d . . . 
O1A O 0.2233(3) 0.9332(3) 0.25125(13) 0.0355(6) Uani 1 1 d . . . 
O2A O -0.0027(2) 0.9836(2) 0.42964(12) 0.0247(5) Uani 1 1 d . . . 
O3A O 0.3906(3) 1.0724(2) 0.40379(14) 0.0331(6) Uani 1 1 d . . . 
N1A N 0.3500(2) 0.7552(2) 0.50498(13) 0.0139(5) Uani 1 1 d . . . 
N2A N 0.4863(2) 0.7123(2) 0.38693(13) 0.0148(6) Uani 1 1 d . . . 
C1A C 0.2502(3) 0.8977(3) 0.30688(18) 0.0204(7) Uani 1 1 d . . . 
C2A C 0.1076(3) 0.9311(3) 0.42114(16) 0.0171(7) Uani 1 1 d . . . 
C3A C 0.3540(3) 0.9856(3) 0.40321(17) 0.0207(7) Uani 1 1 d . . . 
C4A C 0.2127(3) 0.6785(3) 0.40219(16) 0.0158(7) Uani 1 1 d . . . 
C5A C 0.1664(3) 0.5930(3) 0.39848(17) 0.0184(7) Uani 1 1 d . . . 
C11A C 0.4757(3) 0.6768(3) 0.50955(17) 0.0161(7) Uani 1 1 d . . . 
C12A C 0.5297(3) 0.6315(3) 0.57226(17) 0.0200(7) Uani 1 1 d . . . 
C13A C 0.4545(4) 0.6652(3) 0.63120(18) 0.0235(8) Uani 1 1 d . . . 
C14A C 0.3255(3) 0.7412(3) 0.62781(17) 0.0177(7) Uani 1 1 d . . . 
C15A C 0.2784(3) 0.7834(3) 0.56303(17) 0.0166(7) Uani 1 1 d . . . 
C16A C 0.2393(4) 0.7755(4) 0.69078(19) 0.0226(8) Uani 1 1 d . . . 
C21A C 0.5474(3) 0.6485(3) 0.44388(17) 0.0168(7) Uani 1 1 d . . . 
C22A C 0.6726(3) 0.5632(3) 0.43958(18) 0.0185(7) Uani 1 1 d . . . 
C23A C 0.7359(3) 0.5457(3) 0.37553(18) 0.0204(7) Uani 1 1 d . . . 
C24A C 0.6733(3) 0.6115(3) 0.31647(17) 0.0182(7) Uani 1 1 d . . . 
C25A C 0.5484(3) 0.6922(3) 0.32511(17) 0.0169(7) Uani 1 1 d . . . 
C26A C 0.7379(4) 0.5958(4) 0.24566(19) 0.0245(8) Uani 1 1 d . . . 
C31A C 0.1221(3) 0.4871(3) 0.38827(16) 0.0168(7) Uani 1 1 d . . . 
C32A C 0.0924(3) 0.3961(3) 0.44404(19) 0.0233(8) Uani 1 1 d . . . 
C33A C 0.0591(4) 0.2901(3) 0.4328(2) 0.0280(8) Uani 1 1 d . . . 
C34A C 0.0538(3) 0.2743(3) 0.3672(2) 0.0269(8) Uani 1 1 d . . . 
C35A C 0.0804(4) 0.3642(3) 0.3116(2) 0.0265(8) Uani 1 1 d . . . 
C36A C 0.1133(3) 0.4698(3) 0.32212(17) 0.0205(7) Uani 1 1 d . . . 
O1S O 1.2117(2) -0.3449(3) 0.15916(13) 0.0376(6) Uani 1 1 d . . . 
C1S C 1.3229(3) -0.4032(3) 0.14238(19) 0.0260(8) Uani 1 1 d . . . 
C2S C 1.3702(5) -0.4081(6) 0.0696(3) 0.0530(13) Uani 1 1 d . . . 
C3S C 1.4196(5) -0.4729(5) 0.1954(3) 0.0420(10) Uani 1 1 d . . . 
H15 H 0.677(4) 0.037(3) -0.0105(17) 0.016(9) Uiso 1 1 d . . . 
H16B H 0.820(3) -0.091(3) -0.1188(18) 0.019(9) Uiso 1 1 d . . . 
H34A H 0.031(3) 0.195(3) 0.3595(18) 0.025(9) Uiso 1 1 d . . . 
H36 H 0.683(4) 0.525(3) 0.0573(18) 0.026(9) Uiso 1 1 d . . . 
H12A H 0.613(4) 0.576(3) 0.5783(17) 0.017(9) Uiso 1 1 d . . . 
H16C H 0.954(4) -0.057(3) -0.1280(17) 0.018(9) Uiso 1 1 d . . . 
H22 H 1.010(4) -0.201(3) 0.2146(18) 0.018(9) Uiso 1 1 d . . . 
H33A H 0.044(3) 0.230(3) 0.4681(18) 0.017(9) Uiso 1 1 d . . . 
H36A H 0.129(3) 0.535(3) 0.2821(18) 0.022(9) Uiso 1 1 d . . . 
H13A H 0.489(3) 0.634(3) 0.6706(19) 0.018(9) Uiso 1 1 d . . . 
H34 H 1.047(4) 0.585(4) 0.081(2) 0.037(11) Uiso 1 1 d . . . 
H32 H 0.961(4) 0.255(4) 0.1651(18) 0.024(10) Uiso 1 1 d . . . 
H26F H 0.693(4) 0.656(3) 0.2100(19) 0.022(9) Uiso 1 1 d . . . 
H16F H 0.188(4) 0.846(4) 0.6819(19) 0.027(11) Uiso 1 1 d . . . 
H15A H 0.202(4) 0.828(3) 0.5567(17) 0.013(9) Uiso 1 1 d . . . 
H23 H 0.967(4) -0.210(3) 0.3294(19) 0.023(9) Uiso 1 1 d . . . 
H33 H 1.108(4) 0.383(3) 0.1423(18) 0.025(10) Uiso 1 1 d . . . 
H23A H 0.829(4) 0.487(3) 0.3731(18) 0.021(9) Uiso 1 1 d . . . 
H22A H 0.708(3) 0.520(3) 0.4800(19) 0.019(9) Uiso 1 1 d . . . 
H35A H 0.081(3) 0.357(3) 0.2621(18) 0.019(9) Uiso 1 1 d . . . 
H35 H 0.836(4) 0.645(4) 0.037(2) 0.041(12) Uiso 1 1 d . . . 
H13 H 1.040(4) -0.174(3) -0.0153(18) 0.015(9) Uiso 1 1 d . . . 
H16D H 0.189(4) 0.716(4) 0.710(2) 0.036(11) Uiso 1 1 d . . . 
H16E H 0.290(4) 0.777(3) 0.727(2) 0.032(10) Uiso 1 1 d . . . 
H32A H 0.092(4) 0.405(4) 0.487(2) 0.039(12) Uiso 1 1 d . . . 
H26D H 0.734(4) 0.516(4) 0.234(2) 0.049(13) Uiso 1 1 d . . . 
H12 H 1.026(4) -0.198(4) 0.102(2) 0.028(10) Uiso 1 1 d . . . 
H25 H 0.602(4) -0.015(3) 0.2954(16) 0.010(8) Uiso 1 1 d . . . 
H26E H 0.837(4) 0.595(4) 0.243(2) 0.044(12) Uiso 1 1 d . . . 
H16A H 0.819(5) 0.037(5) -0.120(2) 0.059(15) Uiso 1 1 d . . . 
H25A H 0.505(4) 0.737(4) 0.288(2) 0.028(10) Uiso 1 1 d . . . 
H2SB H 1.299(5) -0.377(5) 0.043(3) 0.060(15) Uiso 1 1 d . . . 
H2SC H 1.435(7) -0.366(6) 0.059(3) 0.09(2) Uiso 1 1 d . . . 
H26C H 0.663(6) -0.115(5) 0.416(3) 0.066(17) Uiso 1 1 d . . . 
H3SC H 1.508(6) -0.452(5) 0.184(3) 0.075(17) Uiso 1 1 d . . . 
H3SA H 1.388(6) -0.452(5) 0.243(3) 0.085(19) Uiso 1 1 d . . . 
H3SB H 1.432(5) -0.556(5) 0.193(3) 0.071(17) Uiso 1 1 d . . . 
H26B H 0.780(5) -0.056(5) 0.420(3) 0.068(15) Uiso 1 1 d . . . 
H26A H 0.784(7) -0.204(7) 0.431(3) 0.11(2) Uiso 1 1 d . . . 
H2SA H 1.405(5) -0.501(5) 0.068(3) 0.068(16) Uiso 1 1 d . . . 
 
loop_ 
 _atom_site_aniso_label 
 _atom_site_aniso_U_11 
 _atom_site_aniso_U_22 
 _atom_site_aniso_U_33 
 _atom_site_aniso_U_23 
 _atom_site_aniso_U_13 
 _atom_site_aniso_U_12 
Re1 0.01375(9) 0.01413(9) 0.01757(9) 0.00043(6) -0.00509(6) -0.00245(6) 
O1 0.0325(15) 0.0406(16) 0.0399(16) -0.0117(13) 0.0084(14) 0.0043(13) 
O2 0.0283(14) 0.0307(14) 0.0315(14) 0.0083(12) -0.0149(12) -0.0047(12) 
O3 0.0273(14) 0.0239(13) 0.0378(15) -0.0015(11) -0.0067(11) -0.0102(12) 
N1 0.0167(14) 0.0113(13) 0.0218(15) -0.0012(11) -0.0052(12) -0.0036(11) 
N2 0.0160(14) 0.0143(13) 0.0182(14) 0.0024(11) -0.0070(11) -0.0041(11) 
C1 0.026(2) 0.0238(18) 0.0265(19) 0.0049(16) -0.0115(17) -0.0081(16) 
C2 0.0178(17) 0.0174(17) 0.0256(19) -0.0014(15) -0.0021(15) -0.0036(14) 
C3 0.0168(17) 0.0219(18) 0.0221(18) 0.0021(14) -0.0065(14) -0.0032(15) 
C4 0.0213(17) 0.0222(18) 0.0164(17) -0.0030(14) -0.0036(14) -0.0005(16) 
C5 0.0256(18) 0.0179(17) 0.0190(17) -0.0066(14) 0.0003(14) 0.0006(16) 
C11 0.0167(16) 0.0135(15) 0.0222(17) -0.0013(13) -0.0073(14) -0.0038(14) 
C12 0.0172(17) 0.0158(16) 0.0265(19) -0.0008(14) -0.0085(15) -0.0032(15) 
C13 0.0166(18) 0.0174(17) 0.0265(19) -0.0063(15) -0.0025(15) -0.0046(15) 
C14 0.0217(18) 0.0166(16) 0.0239(18) -0.0028(14) -0.0041(14) -0.0088(14) 
C15 0.0164(17) 0.0158(16) 0.0230(18) 0.0011(14) -0.0103(15) -0.0035(14) 
C16 0.023(2) 0.026(2) 0.0236(19) -0.0056(16) -0.0037(16) -0.0063(17) 
C21 0.0207(18) 0.0141(16) 0.0224(18) 0.0007(14) -0.0047(14) -0.0081(14) 
C22 0.0175(18) 0.0154(16) 0.0243(19) -0.0002(14) -0.0076(15) -0.0029(14) 
C23 0.0221(18) 0.0173(17) 0.0274(19) 0.0023(15) -0.0126(16) -0.0044(15) 
C24 0.0241(18) 0.0153(16) 0.0211(17) 0.0003(14) -0.0063(14) -0.0102(14) 
C25 0.0164(18) 0.0169(17) 0.0254(19) -0.0013(14) -0.0029(15) -0.0069(15) 
C26 0.028(2) 0.029(2) 0.0196(18) 0.0025(16) -0.0064(16) -0.0138(18) 
C31 0.0205(17) 0.0200(17) 0.0196(17) -0.0079(14) -0.0001(14) -0.0025(14) 
C32 0.0255(19) 0.0154(18) 0.0239(18) -0.0019(15) -0.0026(15) 0.0022(15) 
C33 0.0192(19) 0.029(2) 0.029(2) -0.0069(16) -0.0048(16) -0.0003(16) 
C34 0.0258(19) 0.0274(19) 0.030(2) -0.0044(16) -0.0024(16) -0.0117(17) 
C35 0.029(2) 0.0177(18) 0.030(2) -0.0006(16) -0.0077(16) -0.0040(16) 
C36 0.0234(19) 0.0212(18) 0.0229(18) -0.0022(15) -0.0049(15) -0.0029(15) 
Re2 0.01162(9) 0.01037(8) 0.01517(9) 0.00006(6) -0.00374(6) -0.00053(6) 
O1A 0.0353(15) 0.0499(17) 0.0174(14) 0.0060(12) -0.0096(11) -0.0100(13) 
O2A 0.0144(13) 0.0202(12) 0.0350(14) -0.0051(11) -0.0031(10) 0.0037(10) 
O3A 0.0314(14) 0.0201(13) 0.0505(17) -0.0031(12) -0.0049(12) -0.0125(12) 
N1A 0.0149(13) 0.0114(12) 0.0155(13) -0.0027(11) -0.0054(11) -0.0015(11) 
N2A 0.0120(13) 0.0128(13) 0.0194(14) -0.0018(11) -0.0049(11) -0.0022(11) 
C1A 0.0140(16) 0.0196(17) 0.026(2) -0.0041(15) 0.0017(14) -0.0041(14) 
C2A 0.023(2) 0.0127(15) 0.0158(16) 0.0017(13) -0.0081(14) -0.0059(15) 
C3A 0.0156(17) 0.0181(18) 0.0243(18) 0.0024(14) -0.0043(14) -0.0007(14) 
C4A 0.0139(16) 0.0124(16) 0.0176(16) -0.0009(13) -0.0061(13) 0.0034(13) 
C5A 0.0141(16) 0.0174(17) 0.0188(17) 0.0005(14) -0.0047(13) 0.0026(14) 
C11A 0.0143(16) 0.0104(15) 0.0236(18) -0.0010(13) -0.0046(14) -0.0033(13) 
C12A 0.0162(17) 0.0177(17) 0.0235(19) -0.0006(14) -0.0088(14) 0.0006(15) 
C13A 0.027(2) 0.0243(18) 0.0186(18) 0.0038(15) -0.0137(16) -0.0059(16) 
C14A 0.0200(17) 0.0137(15) 0.0213(17) -0.0030(13) -0.0050(14) -0.0061(14) 
C15A 0.0150(17) 0.0102(15) 0.0242(19) -0.0021(14) -0.0039(14) -0.0020(14) 
C16A 0.029(2) 0.0172(19) 0.0205(19) -0.0038(15) -0.0047(16) -0.0019(18) 
C21A 0.0158(16) 0.0136(15) 0.0225(17) -0.0013(13) -0.0069(14) -0.0051(13) 
C22A 0.0166(17) 0.0153(16) 0.0236(19) -0.0023(14) -0.0066(15) -0.0024(14) 
C23A 0.0151(17) 0.0141(16) 0.033(2) -0.0075(15) -0.0020(15) -0.0034(14) 
C24A 0.0183(17) 0.0115(15) 0.0263(18) -0.0044(14) 0.0005(14) -0.0066(14) 
C25A 0.0171(17) 0.0138(16) 0.0199(18) -0.0009(14) -0.0022(15) -0.0057(14) 
C26A 0.0211(19) 0.0218(19) 0.027(2) -0.0064(17) 0.0011(16) -0.0001(16) 
C31A 0.0105(15) 0.0160(16) 0.0217(17) -0.0013(13) -0.0047(13) 0.0004(13) 
C32A 0.0229(18) 0.0219(18) 0.025(2) 0.0008(15) -0.0109(15) -0.0050(15) 
C33A 0.027(2) 0.0177(18) 0.038(2) 0.0084(17) -0.0124(17) -0.0102(16) 
C34A 0.0227(18) 0.0182(18) 0.042(2) -0.0067(17) -0.0103(16) -0.0046(15) 
C35A 0.0228(19) 0.028(2) 0.031(2) -0.0151(17) -0.0060(16) -0.0005(16) 
C36A 0.0153(16) 0.0225(18) 0.0217(18) -0.0035(15) 0.0005(14) -0.0027(14) 
O1S 0.0211(14) 0.0465(16) 0.0358(15) -0.0002(13) -0.0055(12) 0.0030(13) 
C1S 0.022(2) 0.0251(19) 0.030(2) -0.0009(16) -0.0053(16) -0.0066(16) 
C2S 0.036(3) 0.086(4) 0.036(3) -0.011(3) -0.006(2) -0.013(3) 
C3S 0.033(2) 0.038(3) 0.046(3) 0.001(2) -0.012(2) 0.003(2) 
 
_geom_special_details 
; 
 All esds (except the esd in the dihedral angle between two l.s. planes) 
 are estimated using the full covariance matrix.  The cell esds are taken 
 into account individually in the estimation of esds in distances, angles 
 and torsion angles; correlations between esds in cell parameters are only 
 used when they are defined by crystal symmetry.  An approximate (isotropic) 
 treatment of cell esds is used for estimating esds involving l.s. planes. 
; 
 
loop_ 
 _geom_bond_atom_site_label_1 
 _geom_bond_atom_site_label_2 
 _geom_bond_distance 
 _geom_bond_site_symmetry_2 
 _geom_bond_publ_flag 
Re1 C2 1.920(3) . ? 
Re1 C1 1.930(4) . ? 
Re1 C3 1.957(4) . ? 
Re1 C4 2.137(4) . ? 
Re1 N1 2.175(3) . ? 
Re1 N2 2.186(2) . ? 
O1 C1 1.148(4) . ? 
O2 C2 1.151(4) . ? 
O3 C3 1.153(4) . ? 
N1 C15 1.339(4) . ? 
N1 C11 1.358(4) . ? 
N2 C25 1.343(4) . ? 
N2 C21 1.358(4) . ? 
C4 C5 1.204(5) . ? 
C5 C31 1.448(5) . ? 
C11 C12 1.392(5) . ? 
C11 C21 1.474(5) . ? 
C12 C13 1.373(5) . ? 
C12 H12 0.87(4) . ? 
C13 C14 1.390(5) . ? 
C13 H13 0.86(4) . ? 
C14 C15 1.381(5) . ? 
C14 C16 1.497(5) . ? 
C15 H15 0.87(4) . ? 
C16 H16B 0.90(4) . ? 
C16 H16C 1.00(4) . ? 
C16 H16A 0.86(5) . ? 
C21 C22 1.387(5) . ? 
C22 C23 1.384(5) . ? 
C22 H22 0.89(4) . ? 
C23 C24 1.396(5) . ? 
C23 H23 0.89(4) . ? 
C24 C25 1.382(5) . ? 
C24 C26 1.497(5) . ? 
C25 H25 0.85(3) . ? 
C26 H26C 0.81(6) . ? 
C26 H26B 1.01(5) . ? 
C26 H26A 1.02(7) . ? 
C31 C32 1.399(5) . ? 
C31 C36 1.403(5) . ? 
C32 C33 1.385(5) . ? 
C32 H32 0.89(4) . ? 
C33 C34 1.392(5) . ? 
C33 H33 0.92(4) . ? 
C34 C35 1.386(5) . ? 
C34 H34 0.98(4) . ? 
C35 C36 1.377(5) . ? 
C35 H35 0.87(4) . ? 
C36 H36 1.01(4) . ? 
Re2 C2A 1.909(3) . ? 
Re2 C1A 1.923(4) . ? 
Re2 C3A 1.971(3) . ? 
Re2 C4A 2.137(3) . ? 
Re2 N1A 2.184(2) . ? 
Re2 N2A 2.195(2) . ? 
O1A C1A 1.143(4) . ? 
O2A C2A 1.149(4) . ? 
O3A C3A 1.142(4) . ? 
N1A C15A 1.341(4) . ? 
N1A C11A 1.367(4) . ? 
N2A C21A 1.346(4) . ? 
N2A C25A 1.348(4) . ? 
C4A C5A 1.206(5) . ? 
C5A C31A 1.447(5) . ? 
C11A C12A 1.381(5) . ? 
C11A C21A 1.471(5) . ? 
C12A C13A 1.387(5) . ? 
C12A H12A 0.93(4) . ? 
C13A C14A 1.384(5) . ? 
C13A H13A 0.87(4) . ? 
C14A C15A 1.387(5) . ? 
C14A C16A 1.501(5) . ? 
C15A H15A 0.83(4) . ? 
C16A H16F 0.82(4) . ? 
C16A H16D 0.95(4) . ? 
C16A H16E 0.95(4) . ? 
C21A C22A 1.396(5) . ? 
C22A C23A 1.386(5) . ? 
C22A H22A 0.91(4) . ? 
C23A C24A 1.391(5) . ? 
C23A H23A 1.02(4) . ? 
C24A C25A 1.381(5) . ? 
C24A C26A 1.507(5) . ? 
C25A H25A 0.91(4) . ? 
C26A H26F 0.94(4) . ? 
C26A H26D 0.98(5) . ? 
C26A H26E 1.02(4) . ? 
C31A C36A 1.395(5) . ? 
C31A C32A 1.406(5) . ? 
C32A C33A 1.394(5) . ? 
C32A H32A 0.89(4) . ? 
C33A C34A 1.369(5) . ? 
C33A H33A 0.90(4) . ? 
C34A C35A 1.386(5) . ? 
C34A H34A 1.02(4) . ? 
C35A C36A 1.383(5) . ? 
C35A H35A 1.01(3) . ? 
C36A H36A 0.99(4) . ? 
O1S C1S 1.208(4) . ? 
C1S C2S 1.479(6) . ? 
C1S C3S 1.501(5) . ? 
C2S H2SB 0.92(5) . ? 
C2S H2SC 0.90(6) . ? 
C2S H2SA 1.01(6) . ? 
C3S H3SC 1.00(6) . ? 
C3S H3SA 1.02(6) . ? 
C3S H3SB 0.92(6) . ? 
 
loop_ 
 _geom_angle_atom_site_label_1 
 _geom_angle_atom_site_label_2 
 _geom_angle_atom_site_label_3 
 _geom_angle 
 _geom_angle_site_symmetry_1 
 _geom_angle_site_symmetry_3 
 _geom_angle_publ_flag 
C2 Re1 C1 87.49(14) . . ? 
C2 Re1 C3 91.42(13) . . ? 
C1 Re1 C3 92.99(14) . . ? 
C2 Re1 C4 91.08(13) . . ? 
C1 Re1 C4 93.33(13) . . ? 
C3 Re1 C4 173.30(13) . . ? 
C2 Re1 N1 98.59(12) . . ? 
C1 Re1 N1 173.32(12) . . ? 
C3 Re1 N1 89.63(12) . . ? 
C4 Re1 N1 83.85(11) . . ? 
C2 Re1 N2 172.31(12) . . ? 
C1 Re1 N2 98.99(12) . . ? 
C3 Re1 N2 92.36(11) . . ? 
C4 Re1 N2 84.45(11) . . ? 
N1 Re1 N2 74.75(10) . . ? 
C15 N1 C11 118.9(3) . . ? 
C15 N1 Re1 124.0(2) . . ? 
C11 N1 Re1 117.0(2) . . ? 
C25 N2 C21 118.6(3) . . ? 
C25 N2 Re1 124.4(2) . . ? 
C21 N2 Re1 116.9(2) . . ? 
O1 C1 Re1 178.5(3) . . ? 
O2 C2 Re1 178.3(3) . . ? 
O3 C3 Re1 178.1(3) . . ? 
C5 C4 Re1 174.2(3) . . ? 
C4 C5 C31 177.0(3) . . ? 
N1 C11 C12 120.3(3) . . ? 
N1 C11 C21 115.8(3) . . ? 
C12 C11 C21 123.9(3) . . ? 
C13 C12 C11 119.8(3) . . ? 
C13 C12 H12 123(3) . . ? 
C11 C12 H12 117(3) . . ? 
C12 C13 C14 120.2(3) . . ? 
C12 C13 H13 120(2) . . ? 
C14 C13 H13 119(2) . . ? 
C15 C14 C13 116.9(3) . . ? 
C15 C14 C16 119.7(3) . . ? 
C13 C14 C16 123.4(3) . . ? 
N1 C15 C14 123.8(3) . . ? 
N1 C15 H15 116(2) . . ? 
C14 C15 H15 121(2) . . ? 
C14 C16 H16B 111(2) . . ? 
C14 C16 H16C 111.7(19) . . ? 
H16B C16 H16C 108(3) . . ? 
C14 C16 H16A 109(3) . . ? 
H16B C16 H16A 109(4) . . ? 
H16C C16 H16A 109(4) . . ? 
N2 C21 C22 120.6(3) . . ? 
N2 C21 C11 115.3(3) . . ? 
C22 C21 C11 124.1(3) . . ? 
C23 C22 C21 119.8(3) . . ? 
C23 C22 H22 119(2) . . ? 
C21 C22 H22 121(2) . . ? 
C22 C23 C24 120.1(3) . . ? 
C22 C23 H23 119(2) . . ? 
C24 C23 H23 120(2) . . ? 
C25 C24 C23 116.5(3) . . ? 
C25 C24 C26 121.2(3) . . ? 
C23 C24 C26 122.3(3) . . ? 
N2 C25 C24 124.3(3) . . ? 
N2 C25 H25 115(2) . . ? 
C24 C25 H25 120(2) . . ? 
C24 C26 H26C 114(4) . . ? 
C24 C26 H26B 109(3) . . ? 
H26C C26 H26B 117(5) . . ? 
C24 C26 H26A 111(4) . . ? 
H26C C26 H26A 99(5) . . ? 
H26B C26 H26A 106(4) . . ? 
C32 C31 C36 118.0(3) . . ? 
C32 C31 C5 120.8(3) . . ? 
C36 C31 C5 121.3(3) . . ? 
C33 C32 C31 121.5(3) . . ? 
C33 C32 H32 120(2) . . ? 
C31 C32 H32 118(2) . . ? 
C32 C33 C34 119.6(3) . . ? 
C32 C33 H33 121(2) . . ? 
C34 C33 H33 119(2) . . ? 
C35 C34 C33 119.3(3) . . ? 
C35 C34 H34 123(2) . . ? 
C33 C34 H34 118(2) . . ? 
C36 C35 C34 121.2(3) . . ? 
C36 C35 H35 118(3) . . ? 
C34 C35 H35 120(3) . . ? 
C35 C36 C31 120.4(3) . . ? 
C35 C36 H36 120(2) . . ? 
C31 C36 H36 119(2) . . ? 
C2A Re2 C1A 85.06(13) . . ? 
C2A Re2 C3A 91.00(13) . . ? 
C1A Re2 C3A 91.73(14) . . ? 
C2A Re2 C4A 88.51(12) . . ? 
C1A Re2 C4A 89.24(13) . . ? 
C3A Re2 C4A 178.86(12) . . ? 
C2A Re2 N1A 101.63(11) . . ? 
C1A Re2 N1A 173.13(11) . . ? 
C3A Re2 N1A 89.70(11) . . ? 
C4A Re2 N1A 89.40(10) . . ? 
C2A Re2 N2A 173.29(11) . . ? 
C1A Re2 N2A 98.70(12) . . ? 
C3A Re2 N2A 94.43(11) . . ? 
C4A Re2 N2A 85.99(10) . . ? 
N1A Re2 N2A 74.49(9) . . ? 
C15A N1A C11A 118.5(3) . . ? 
C15A N1A Re2 124.5(2) . . ? 
C11A N1A Re2 116.8(2) . . ? 
C21A N2A C25A 118.7(3) . . ? 
C21A N2A Re2 117.0(2) . . ? 
C25A N2A Re2 124.2(2) . . ? 
O1A C1A Re2 177.4(3) . . ? 
O2A C2A Re2 175.5(3) . . ? 
O3A C3A Re2 178.7(3) . . ? 
C5A C4A Re2 175.4(3) . . ? 
C4A C5A C31A 173.8(3) . . ? 
N1A C11A C12A 120.8(3) . . ? 
N1A C11A C21A 115.4(3) . . ? 
C12A C11A C21A 123.8(3) . . ? 
C11A C12A C13A 119.3(3) . . ? 
C11A C12A H12A 124(2) . . ? 
C13A C12A H12A 116(2) . . ? 
C14A C13A C12A 120.6(3) . . ? 
C14A C13A H13A 121(2) . . ? 
C12A C13A H13A 119(2) . . ? 
C13A C14A C15A 116.7(3) . . ? 
C13A C14A C16A 122.1(3) . . ? 
C15A C14A C16A 121.2(3) . . ? 
N1A C15A C14A 124.0(3) . . ? 
N1A C15A H15A 113(2) . . ? 
C14A C15A H15A 123(2) . . ? 
C14A C16A H16F 111(3) . . ? 
C14A C16A H16D 112(2) . . ? 
H16F C16A H16D 109(4) . . ? 
C14A C16A H16E 112(2) . . ? 
H16F C16A H16E 107(3) . . ? 
H16D C16A H16E 105(3) . . ? 
N2A C21A C22A 121.1(3) . . ? 
N2A C21A C11A 115.9(3) . . ? 
C22A C21A C11A 123.0(3) . . ? 
C23A C22A C21A 119.4(3) . . ? 
C23A C22A H22A 123(2) . . ? 
C21A C22A H22A 117(2) . . ? 
C22A C23A C24A 119.8(3) . . ? 
C22A C23A H23A 118(2) . . ? 
C24A C23A H23A 122(2) . . ? 
C25A C24A C23A 117.3(3) . . ? 
C25A C24A C26A 120.9(3) . . ? 
C23A C24A C26A 121.8(3) . . ? 
N2A C25A C24A 123.7(3) . . ? 
N2A C25A H25A 117(2) . . ? 
C24A C25A H25A 120(2) . . ? 
C24A C26A H26F 114(2) . . ? 
C24A C26A H26D 112(3) . . ? 
H26F C26A H26D 102(3) . . ? 
C24A C26A H26E 110(2) . . ? 
H26F C26A H26E 112(3) . . ? 
H26D C26A H26E 107(3) . . ? 
C36A C31A C32A 118.0(3) . . ? 
C36A C31A C5A 120.5(3) . . ? 
C32A C31A C5A 121.4(3) . . ? 
C33A C32A C31A 120.4(3) . . ? 
C33A C32A H32A 118(3) . . ? 
C31A C32A H32A 122(3) . . ? 
C34A C33A C32A 120.3(4) . . ? 
C34A C33A H33A 119(2) . . ? 
C32A C33A H33A 121(2) . . ? 
C33A C34A C35A 120.1(3) . . ? 
C33A C34A H34A 120(2) . . ? 
C35A C34A H34A 120(2) . . ? 
C36A C35A C34A 120.2(3) . . ? 
C36A C35A H35A 115.6(19) . . ? 
C34A C35A H35A 124.1(19) . . ? 
C35A C36A C31A 121.0(3) . . ? 
C35A C36A H36A 120(2) . . ? 
C31A C36A H36A 119(2) . . ? 
O1S C1S C2S 122.0(4) . . ? 
O1S C1S C3S 120.7(4) . . ? 
C2S C1S C3S 117.3(4) . . ? 
C1S C2S H2SB 109(3) . . ? 
C1S C2S H2SC 107(4) . . ? 
H2SB C2S H2SC 115(5) . . ? 
C1S C2S H2SA 105(3) . . ? 
H2SB C2S H2SA 107(4) . . ? 
H2SC C2S H2SA 113(5) . . ? 
C1S C3S H3SC 112(3) . . ? 
C1S C3S H3SA 114(3) . . ? 
H3SC C3S H3SA 105(4) . . ? 
C1S C3S H3SB 103(3) . . ? 
H3SC C3S H3SB 108(5) . . ? 
H3SA C3S H3SB 114(5) . . ? 
 
_diffrn_measured_fraction_theta_max    0.947 
_diffrn_reflns_theta_full              66.57 
_diffrn_measured_fraction_theta_full   0.947 
_refine_diff_density_max    0.746 
_refine_diff_density_min   -0.499 
_refine_diff_density_rms    0.076 

#===END

 
data_66Me2bpyReBr 
 
_audit_creation_method            SHELXL-97 
_chemical_name_systematic 
; 
 ? 
; 
_chemical_name_common             ? 
_chemical_melting_point           ? 
_chemical_formula_moiety          ? 
_chemical_formula_sum 
 'C17 H16 Br N2 O3.50 Re' 
_chemical_formula_weight          570.43 
 
loop_ 
 _atom_type_symbol 
 _atom_type_description 
 _atom_type_scat_dispersion_real 
 _atom_type_scat_dispersion_imag 
 _atom_type_scat_source 
 'C'  'C'   0.0181   0.0091 
 'International Tables Vol C Tables 4.2.6.8 and 6.1.1.4' 
 'H'  'H'   0.0000   0.0000 
 'International Tables Vol C Tables 4.2.6.8 and 6.1.1.4' 
 'N'  'N'   0.0311   0.0180 
 'International Tables Vol C Tables 4.2.6.8 and 6.1.1.4' 
 'O'  'O'   0.0492   0.0322 
 'International Tables Vol C Tables 4.2.6.8 and 6.1.1.4' 
 'Br'  'Br'  -0.6763   1.2805 
 'International Tables Vol C Tables 4.2.6.8 and 6.1.1.4' 
 'Re'  'Re'  -5.2083   5.8923 
 'International Tables Vol C Tables 4.2.6.8 and 6.1.1.4' 
 
_symmetry_cell_setting            triclinic 
_symmetry_space_group_name_H-M    'P -1'
 
loop_ 
 _symmetry_equiv_pos_as_xyz 
 'x, y, z' 
 '-x, -y, -z' 
 
_cell_length_a                    8.2628(2) 
_cell_length_b                    9.5792(2) 
_cell_length_c                    11.4401(2) 
_cell_angle_alpha                 79.7850(10) 
_cell_angle_beta                  88.9520(10) 
_cell_angle_gamma                 87.2710(10) 
_cell_volume                      890.09(3) 
_cell_formula_units_Z             2 
_cell_measurement_temperature     100(2) 
_cell_measurement_reflns_used     3707 
_cell_measurement_theta_min       4
_cell_measurement_theta_max       66 
 
_exptl_crystal_description        'plate'
_exptl_crystal_colour             'yellow'
_exptl_crystal_size_max           0.22 
_exptl_crystal_size_mid           0.16 
_exptl_crystal_size_min           0.07 
_exptl_crystal_density_meas       ? 
_exptl_crystal_density_diffrn     2.128 
_exptl_crystal_density_method     'not measured' 
_exptl_crystal_F_000              540 
_exptl_absorpt_coefficient_mu     16.167 
_exptl_absorpt_correction_type    numerical 
_exptl_absorpt_correction_T_min   0.1251 
_exptl_absorpt_correction_T_max   0.3974 
_exptl_absorpt_process_details    ? 
 
_exptl_special_details 
; 
 ? 
; 
 
_diffrn_ambient_temperature       100(2) 
_diffrn_radiation_wavelength      1.54178 
_diffrn_radiation_type            CuK\a 
_diffrn_radiation_source          'fine-focus sealed tube' 
_diffrn_radiation_monochromator   graphite 
_diffrn_measurement_device_type   'Bruker APEX2 CCD detector' 
_diffrn_measurement_method        '\w scans' 
_diffrn_detector_area_resol_mean  ? 
_diffrn_standards_number          ? 
_diffrn_standards_interval_count  ? 
_diffrn_standards_interval_time   ? 
_diffrn_standards_decay_%         ? 
_diffrn_reflns_number             7208 
_diffrn_reflns_av_R_equivalents   0.0264 
_diffrn_reflns_av_sigmaI/netI     0.0297 
_diffrn_reflns_limit_h_min        -9 
_diffrn_reflns_limit_h_max        9 
_diffrn_reflns_limit_k_min        -10 
_diffrn_reflns_limit_k_max        11 
_diffrn_reflns_limit_l_min        0 
_diffrn_reflns_limit_l_max        12 
_diffrn_reflns_theta_min          3.93 
_diffrn_reflns_theta_max          66.73 
_reflns_number_total              2883 
_reflns_number_gt                 2635 
_reflns_threshold_expression      >2sigma(I) 
 
_computing_data_collection        'APEX2 v2.0-2 (Bruker, 2005)' 
_computing_cell_refinement        'SAINT v7.23A (Bruker, 2005)' 
_computing_data_reduction         'SADABS-2004/1 (Bruker, 2005)' 
_computing_structure_solution     'XS/SHELXTL v6.12 (Bruker, 2001)' 
_computing_structure_refinement   'SHELXL-97 v.97-2 (Sheldrick, 1993-1997)' 
_computing_molecular_graphics     'XP v5.1 (Bruker, 1998)' 
_computing_publication_material   'XCIF v6.12 (Bruker, 2001)' 
 
_refine_special_details 
; 
 Refinement of F^2^ against ALL reflections.  The weighted R-factor wR and 
 goodness of fit S are based on F^2^, conventional R-factors R are based 
 on F, with F set to zero for negative F^2^. The threshold expression of 
 F^2^ > 2sigma(F^2^) is used only for calculating R-factors(gt) etc. and is 
 not relevant to the choice of reflections for refinement.  R-factors based 
 on F^2^ are statistically about twice as large as those based on F, and R- 
 factors based on ALL data will be even larger. 
; 
 
_refine_ls_structure_factor_coef  Fsqd  
_refine_ls_matrix_type            full 
_refine_ls_weighting_scheme       calc  
_refine_ls_weighting_details 
 'calc w=1/[\s^2^(Fo^2^)+(0.0455P)^2^+5.3583P] where P=(Fo^2^+2Fc^2^)/3' 
_atom_sites_solution_primary      direct 
_atom_sites_solution_secondary    difmap 
_atom_sites_solution_hydrogens    difmap 
_refine_ls_hydrogen_treatment     mixed 
_refine_ls_extinction_method      none 
_refine_ls_extinction_coef        ? 
_refine_ls_number_reflns          2883 
_refine_ls_number_parameters      255 
_refine_ls_number_restraints      0 
_refine_ls_R_factor_all           0.0387 
_refine_ls_R_factor_gt            0.0342 
_refine_ls_wR_factor_ref          0.0836 
_refine_ls_wR_factor_gt           0.0816 
_refine_ls_goodness_of_fit_ref    1.018 
_refine_ls_restrained_S_all       1.018 
_refine_ls_shift/su_max           0.005 
_refine_ls_shift/su_mean          0.000 
 
loop_ 
 _atom_site_label 
 _atom_site_type_symbol 
 _atom_site_fract_x 
 _atom_site_fract_y 
 _atom_site_fract_z 
 _atom_site_U_iso_or_equiv 
 _atom_site_adp_type 
 _atom_site_occupancy 
 _atom_site_symmetry_multiplicity 
 _atom_site_calc_flag 
 _atom_site_refinement_flags 
 _atom_site_disorder_assembly 
 _atom_site_disorder_group 
Re1 Re 0.15251(3) 0.23439(3) 0.70058(3) 0.02311(12) Uani 1 1 d . . . 
Br1 Br 0.38497(8) 0.09045(8) 0.82685(6) 0.02951(18) Uani 1 1 d . . . 
O1 O 0.0669(7) 0.4114(5) 0.8937(5) 0.0381(12) Uani 1 1 d . . . 
O2 O 0.3768(7) 0.4827(6) 0.6332(5) 0.0451(14) Uani 1 1 d . . . 
O3 O -0.1274(7) 0.4005(5) 0.5613(5) 0.0387(13) Uani 1 1 d . . . 
N1 N 0.2173(6) 0.1013(6) 0.5665(5) 0.0219(11) Uani 1 1 d . . . 
N2 N 0.0202(6) 0.0382(6) 0.7557(5) 0.0209(11) Uani 1 1 d . . . 
C1 C 0.0977(9) 0.3394(8) 0.8253(7) 0.0311(16) Uani 1 1 d . . . 
C2 C 0.2949(9) 0.3883(8) 0.6534(7) 0.0311(16) Uani 1 1 d . . . 
C3 C -0.0234(10) 0.3384(8) 0.6101(7) 0.0316(17) Uani 1 1 d . . . 
C11 C 0.1909(8) -0.0387(7) 0.6040(6) 0.0243(14) Uani 1 1 d . . . 
C12 C 0.2504(9) -0.1418(8) 0.5407(6) 0.0291(16) Uani 1 1 d . . . 
H12 H 0.237(10) -0.224(9) 0.574(7) 0.035 Uiso 1 1 d . . . 
C13 C 0.3296(9) -0.1016(9) 0.4339(7) 0.0312(16) Uani 1 1 d . . . 
H13 H 0.372(10) -0.165(9) 0.393(7) 0.037 Uiso 1 1 d . . . 
C14 C 0.3488(8) 0.0400(8) 0.3921(6) 0.0294(16) Uani 1 1 d . . . 
H14 H 0.397(9) 0.069(8) 0.319(7) 0.035 Uiso 1 1 d . . . 
C15 C 0.2923(8) 0.1407(8) 0.4598(6) 0.0264(15) Uani 1 1 d . . . 
C16 C 0.3149(10) 0.2934(9) 0.4133(7) 0.0331(17) Uani 1 1 d . . . 
H16A H 0.331(11) 0.307(10) 0.341(9) 0.050 Uiso 1 1 d . . . 
H16B H 0.397(12) 0.325(10) 0.447(8) 0.050 Uiso 1 1 d . . . 
H16C H 0.221(12) 0.345(10) 0.428(8) 0.050 Uiso 1 1 d . . . 
C21 C 0.0824(8) -0.0742(7) 0.7083(6) 0.0237(14) Uani 1 1 d . . . 
C22 C 0.0387(9) -0.2109(8) 0.7513(7) 0.0306(16) Uani 1 1 d . . . 
H22 H 0.090(10) -0.282(9) 0.721(7) 0.037 Uiso 1 1 d . . . 
C23 C -0.0745(9) -0.2346(8) 0.8398(7) 0.0320(17) Uani 1 1 d . . . 
H23 H -0.102(10) -0.313(9) 0.862(8) 0.038 Uiso 1 1 d . . . 
C24 C -0.1472(9) -0.1215(8) 0.8821(6) 0.0272(15) Uani 1 1 d . . . 
H24 H -0.233(9) -0.131(8) 0.943(7) 0.033 Uiso 1 1 d . . . 
C25 C -0.0982(8) 0.0142(7) 0.8400(6) 0.0242(14) Uani 1 1 d . . . 
C26 C -0.1756(9) 0.1375(8) 0.8854(7) 0.0278(16) Uani 1 1 d . . . 
H26A H -0.117(11) 0.160(10) 0.933(8) 0.042 Uiso 1 1 d . . . 
H26B H -0.258(11) 0.115(9) 0.918(8) 0.042 Uiso 1 1 d . . . 
H26C H -0.200(10) 0.211(9) 0.813(8) 0.042 Uiso 1 1 d . . . 
O1S O -0.5947(16) 0.3931(14) 1.1018(12) 0.057(3) Uiso 0.50 1 d P A -1 
C1S C -0.589(3) 0.540(3) 1.075(2) 0.051(7) Uiso 0.50 1 d P A -1 
H1SA H -0.5306 0.5752 1.1379 0.061 Uiso 0.50 1 calc PR A -1 
H1SB H -0.7005 0.5834 1.0708 0.061 Uiso 0.50 1 calc PR A -1 
C2S C -0.508(4) 0.579(3) 0.963(3) 0.086(8) Uiso 0.50 1 d P A -1 
H2SA H -0.4444 0.6644 0.9622 0.103 Uiso 0.50 1 calc PR A -1 
H2SB H -0.5861 0.5979 0.8971 0.103 Uiso 0.50 1 calc PR A -1 
C3S C -0.394(3) 0.445(3) 0.955(3) 0.054(8) Uiso 0.50 1 d P A -1 
H3SA H -0.4168 0.4039 0.8838 0.065 Uiso 0.50 1 calc PR A -1 
H3SB H -0.2782 0.4667 0.9553 0.065 Uiso 0.50 1 calc PR A -1 
C4S C -0.442(3) 0.350(3) 1.066(2) 0.065(6) Uiso 0.50 1 d P A -1 
H4SA H -0.4431 0.2513 1.0520 0.078 Uiso 0.50 1 calc PR A -1 
H4SB H -0.3626 0.3539 1.1288 0.078 Uiso 0.50 1 calc PR A -1 
 
loop_ 
 _atom_site_aniso_label 
 _atom_site_aniso_U_11 
 _atom_site_aniso_U_22 
 _atom_site_aniso_U_33 
 _atom_site_aniso_U_23 
 _atom_site_aniso_U_13 
 _atom_site_aniso_U_12 
Re1 0.02296(17) 0.02050(18) 0.02513(18) -0.00123(12) 0.00414(11) -0.00554(12) 
Br1 0.0237(4) 0.0346(4) 0.0292(4) -0.0032(3) 0.0022(3) -0.0011(3) 
O1 0.051(3) 0.028(3) 0.037(3) -0.009(2) 0.009(2) -0.006(3) 
O2 0.048(3) 0.038(3) 0.049(3) 0.000(3) 0.006(3) -0.022(3) 
O3 0.039(3) 0.023(3) 0.051(3) 0.002(2) -0.011(3) -0.004(3) 
N1 0.021(3) 0.018(3) 0.025(3) -0.001(2) 0.000(2) -0.003(2) 
N2 0.020(3) 0.019(3) 0.024(3) 0.000(2) -0.001(2) -0.005(2) 
C1 0.030(4) 0.029(4) 0.030(4) 0.006(3) -0.001(3) -0.007(3) 
C2 0.027(4) 0.031(4) 0.036(4) -0.004(3) -0.001(3) -0.008(3) 
C3 0.044(4) 0.024(4) 0.030(4) -0.009(3) 0.010(3) -0.015(4) 
C11 0.018(3) 0.028(4) 0.025(4) 0.000(3) -0.001(3) -0.003(3) 
C12 0.031(4) 0.026(4) 0.030(4) -0.004(3) 0.000(3) -0.002(3) 
C13 0.025(4) 0.039(4) 0.030(4) -0.008(3) 0.001(3) 0.000(3) 
C14 0.023(3) 0.040(4) 0.025(4) -0.004(3) 0.003(3) -0.004(3) 
C15 0.022(3) 0.031(4) 0.025(4) -0.001(3) -0.001(3) -0.002(3) 
C16 0.036(4) 0.035(4) 0.027(4) 0.001(3) 0.008(3) -0.007(4) 
C21 0.024(3) 0.023(3) 0.023(3) -0.002(3) -0.002(3) 0.003(3) 
C22 0.034(4) 0.024(4) 0.032(4) -0.002(3) 0.001(3) 0.000(3) 
C23 0.035(4) 0.026(4) 0.032(4) 0.004(3) -0.004(3) -0.008(3) 
C24 0.028(4) 0.027(4) 0.023(4) 0.003(3) 0.005(3) -0.007(3) 
C25 0.018(3) 0.025(4) 0.028(4) -0.001(3) -0.003(3) -0.003(3) 
C26 0.018(3) 0.033(4) 0.030(4) -0.001(3) 0.005(3) -0.006(3) 
 
_geom_special_details 
; 
 All esds (except the esd in the dihedral angle between two l.s. planes) 
 are estimated using the full covariance matrix.  The cell esds are taken 
 into account individually in the estimation of esds in distances, angles 
 and torsion angles; correlations between esds in cell parameters are only 
 used when they are defined by crystal symmetry.  An approximate (isotropic) 
 treatment of cell esds is used for estimating esds involving l.s. planes. 
; 
 
loop_ 
 _geom_bond_atom_site_label_1 
 _geom_bond_atom_site_label_2 
 _geom_bond_distance 
 _geom_bond_site_symmetry_2 
 _geom_bond_publ_flag 
Re1 C1 1.922(8) . ? 
Re1 C2 1.925(7) . ? 
Re1 C3 1.930(9) . ? 
Re1 N2 2.208(5) . ? 
Re1 N1 2.205(5) . ? 
Re1 Br1 2.6115(8) . ? 
O1 C1 1.149(9) . ? 
O2 C2 1.144(9) . ? 
O3 C3 1.121(9) . ? 
N1 C11 1.360(9) . ? 
N1 C15 1.360(9) . ? 
N2 C25 1.359(8) . ? 
N2 C21 1.365(8) . ? 
C11 C12 1.391(10) . ? 
C11 C21 1.480(9) . ? 
C12 C13 1.378(11) . ? 
C12 H12 0.83(8) . ? 
C13 C14 1.371(11) . ? 
C13 H13 0.89(8) . ? 
C14 C15 1.399(10) . ? 
C14 H14 0.92(8) . ? 
C15 C16 1.485(10) . ? 
C16 H16A 0.83(10) . ? 
C16 H16B 0.87(10) . ? 
C16 H16C 0.93(10) . ? 
C21 C22 1.378(10) . ? 
C22 C23 1.362(11) . ? 
C22 H22 0.90(8) . ? 
C23 C24 1.373(11) . ? 
C23 H23 0.79(9) . ? 
C24 C25 1.381(10) . ? 
C24 H24 0.98(8) . ? 
C25 C26 1.486(10) . ? 
C26 H26A 0.81(9) . ? 
C26 H26B 0.79(9) . ? 
C26 H26C 1.00(9) . ? 
O1S C1S 1.39(3) . ? 
O1S C4S 1.39(3) . ? 
C1S C2S 1.43(4) . ? 
C1S H1SA 0.9900 . ? 
C1S H1SB 0.9900 . ? 
C2S C3S 1.57(4) . ? 
C2S H2SA 0.9900 . ? 
C2S H2SB 0.9900 . ? 
C3S C4S 1.48(4) . ? 
C3S H3SA 0.9900 . ? 
C3S H3SB 0.9900 . ? 
C4S H4SA 0.9900 . ? 
C4S H4SB 0.9900 . ? 
 
loop_ 
 _geom_angle_atom_site_label_1 
 _geom_angle_atom_site_label_2 
 _geom_angle_atom_site_label_3 
 _geom_angle 
 _geom_angle_site_symmetry_1 
 _geom_angle_site_symmetry_3 
 _geom_angle_publ_flag 
C1 Re1 C2 82.0(3) . . ? 
C1 Re1 C3 88.0(3) . . ? 
C2 Re1 C3 91.6(3) . . ? 
C1 Re1 N2 102.3(2) . . ? 
C2 Re1 N2 172.0(3) . . ? 
C3 Re1 N2 95.3(2) . . ? 
C1 Re1 N1 176.2(2) . . ? 
C2 Re1 N1 100.5(3) . . ? 
C3 Re1 N1 94.8(2) . . ? 
N2 Re1 N1 74.9(2) . . ? 
C1 Re1 Br1 91.4(2) . . ? 
C2 Re1 Br1 89.7(2) . . ? 
C3 Re1 Br1 178.5(2) . . ? 
N2 Re1 Br1 83.43(14) . . ? 
N1 Re1 Br1 85.73(14) . . ? 
C11 N1 C15 118.4(6) . . ? 
C11 N1 Re1 113.5(4) . . ? 
C15 N1 Re1 127.8(4) . . ? 
C25 N2 C21 118.3(6) . . ? 
C25 N2 Re1 127.6(4) . . ? 
C21 N2 Re1 113.6(4) . . ? 
O1 C1 Re1 174.8(6) . . ? 
O2 C2 Re1 175.0(7) . . ? 
O3 C3 Re1 177.4(6) . . ? 
N1 C11 C12 121.6(6) . . ? 
N1 C11 C21 116.6(6) . . ? 
C12 C11 C21 121.6(6) . . ? 
C13 C12 C11 119.6(7) . . ? 
C13 C12 H12 126(6) . . ? 
C11 C12 H12 115(6) . . ? 
C14 C13 C12 119.2(7) . . ? 
C14 C13 H13 120(5) . . ? 
C12 C13 H13 121(6) . . ? 
C13 C14 C15 119.7(7) . . ? 
C13 C14 H14 120(5) . . ? 
C15 C14 H14 120(5) . . ? 
N1 C15 C14 121.3(6) . . ? 
N1 C15 C16 119.7(6) . . ? 
C14 C15 C16 118.9(7) . . ? 
C15 C16 H16A 111(6) . . ? 
C15 C16 H16B 112(6) . . ? 
H16A C16 H16B 108(9) . . ? 
C15 C16 H16C 109(6) . . ? 
H16A C16 H16C 108(8) . . ? 
H16B C16 H16C 109(8) . . ? 
N2 C21 C22 121.5(6) . . ? 
N2 C21 C11 115.9(6) . . ? 
C22 C21 C11 122.5(6) . . ? 
C23 C22 C21 119.6(7) . . ? 
C23 C22 H22 122(5) . . ? 
C21 C22 H22 118(5) . . ? 
C22 C23 C24 119.5(7) . . ? 
C22 C23 H23 119(6) . . ? 
C24 C23 H23 121(6) . . ? 
C23 C24 C25 119.9(7) . . ? 
C23 C24 H24 123(5) . . ? 
C25 C24 H24 117(5) . . ? 
N2 C25 C24 121.0(6) . . ? 
N2 C25 C26 118.6(6) . . ? 
C24 C25 C26 120.3(6) . . ? 
C25 C26 H26A 109(6) . . ? 
C25 C26 H26B 110(6) . . ? 
H26A C26 H26B 108(9) . . ? 
C25 C26 H26C 106(5) . . ? 
H26A C26 H26C 116(8) . . ? 
H26B C26 H26C 109(8) . . ? 
C1S O1S C4S 101.8(18) . . ? 
O1S C1S C2S 109(2) . . ? 
O1S C1S H1SA 109.8 . . ? 
C2S C1S H1SA 109.8 . . ? 
O1S C1S H1SB 109.8 . . ? 
C2S C1S H1SB 109.8 . . ? 
H1SA C1S H1SB 108.3 . . ? 
C1S C2S C3S 103(2) . . ? 
C1S C2S H2SA 111.2 . . ? 
C3S C2S H2SA 111.2 . . ? 
C1S C2S H2SB 111.2 . . ? 
C3S C2S H2SB 111.2 . . ? 
H2SA C2S H2SB 109.1 . . ? 
C4S C3S C2S 100(2) . . ? 
C4S C3S H3SA 111.8 . . ? 
C2S C3S H3SA 111.8 . . ? 
C4S C3S H3SB 111.8 . . ? 
C2S C3S H3SB 111.8 . . ? 
H3SA C3S H3SB 109.5 . . ? 
O1S C4S C3S 110(2) . . ? 
O1S C4S H4SA 109.7 . . ? 
C3S C4S H4SA 109.7 . . ? 
O1S C4S H4SB 109.7 . . ? 
C3S C4S H4SB 109.7 . . ? 
H4SA C4S H4SB 108.2 . . ? 
 
loop_ 
 _geom_torsion_atom_site_label_1 
 _geom_torsion_atom_site_label_2 
 _geom_torsion_atom_site_label_3 
 _geom_torsion_atom_site_label_4 
 _geom_torsion 
 _geom_torsion_site_symmetry_1 
 _geom_torsion_site_symmetry_2 
 _geom_torsion_site_symmetry_3 
 _geom_torsion_site_symmetry_4 
 _geom_torsion_publ_flag 
C1 Re1 N1 C11 23(4) . . . . ? 
C2 Re1 N1 C11 153.5(5) . . . . ? 
C3 Re1 N1 C11 -114.0(5) . . . . ? 
N2 Re1 N1 C11 -19.8(4) . . . . ? 
Br1 Re1 N1 C11 64.6(4) . . . . ? 
C1 Re1 N1 C15 -150(4) . . . . ? 
C2 Re1 N1 C15 -19.8(6) . . . . ? 
C3 Re1 N1 C15 72.7(6) . . . . ? 
N2 Re1 N1 C15 167.0(6) . . . . ? 
Br1 Re1 N1 C15 -108.7(5) . . . . ? 
C1 Re1 N2 C25 13.6(6) . . . . ? 
C2 Re1 N2 C25 135.1(18) . . . . ? 
C3 Re1 N2 C25 -75.5(6) . . . . ? 
N1 Re1 N2 C25 -169.0(6) . . . . ? 
Br1 Re1 N2 C25 103.7(5) . . . . ? 
C1 Re1 N2 C21 -157.5(4) . . . . ? 
C2 Re1 N2 C21 -36(2) . . . . ? 
C3 Re1 N2 C21 113.4(5) . . . . ? 
N1 Re1 N2 C21 19.9(4) . . . . ? 
Br1 Re1 N2 C21 -67.5(4) . . . . ? 
C2 Re1 C1 O1 33(7) . . . . ? 
C3 Re1 C1 O1 -58(7) . . . . ? 
N2 Re1 C1 O1 -153(7) . . . . ? 
N1 Re1 C1 O1 165(5) . . . . ? 
Br1 Re1 C1 O1 123(7) . . . . ? 
C1 Re1 C2 O2 10(8) . . . . ? 
C3 Re1 C2 O2 98(8) . . . . ? 
N2 Re1 C2 O2 -112(7) . . . . ? 
N1 Re1 C2 O2 -167(8) . . . . ? 
Br1 Re1 C2 O2 -81(8) . . . . ? 
C1 Re1 C3 O3 -12(14) . . . . ? 
C2 Re1 C3 O3 -94(14) . . . . ? 
N2 Re1 C3 O3 90(14) . . . . ? 
N1 Re1 C3 O3 165(14) . . . . ? 
Br1 Re1 C3 O3 56(19) . . . . ? 
C15 N1 C11 C12 5.4(9) . . . . ? 
Re1 N1 C11 C12 -168.5(5) . . . . ? 
C15 N1 C11 C21 -168.7(6) . . . . ? 
Re1 N1 C11 C21 17.4(7) . . . . ? 
N1 C11 C12 C13 -4.0(10) . . . . ? 
C21 C11 C12 C13 169.8(6) . . . . ? 
C11 C12 C13 C14 0.3(11) . . . . ? 
C12 C13 C14 C15 1.9(10) . . . . ? 
C11 N1 C15 C14 -3.2(9) . . . . ? 
Re1 N1 C15 C14 169.7(5) . . . . ? 
C11 N1 C15 C16 176.7(6) . . . . ? 
Re1 N1 C15 C16 -10.4(9) . . . . ? 
C13 C14 C15 N1 -0.4(10) . . . . ? 
C13 C14 C15 C16 179.7(7) . . . . ? 
C25 N2 C21 C22 -6.0(9) . . . . ? 
Re1 N2 C21 C22 166.1(5) . . . . ? 
C25 N2 C21 C11 170.5(6) . . . . ? 
Re1 N2 C21 C11 -17.5(7) . . . . ? 
N1 C11 C21 N2 0.1(8) . . . . ? 
C12 C11 C21 N2 -174.0(6) . . . . ? 
N1 C11 C21 C22 176.5(6) . . . . ? 
C12 C11 C21 C22 2.4(10) . . . . ? 
N2 C21 C22 C23 2.9(11) . . . . ? 
C11 C21 C22 C23 -173.3(7) . . . . ? 
C21 C22 C23 C24 2.1(11) . . . . ? 
C22 C23 C24 C25 -3.9(11) . . . . ? 
C21 N2 C25 C24 4.1(9) . . . . ? 
Re1 N2 C25 C24 -166.7(5) . . . . ? 
C21 N2 C25 C26 -175.3(6) . . . . ? 
Re1 N2 C25 C26 13.9(8) . . . . ? 
C23 C24 C25 N2 0.8(10) . . . . ? 
C23 C24 C25 C26 -179.8(7) . . . . ? 
C4S O1S C1S C2S 40(3) . . . . ? 
O1S C1S C2S C3S -27(3) . . . . ? 
C1S C2S C3S C4S 3(3) . . . . ? 
C1S O1S C4S C3S -38(2) . . . . ? 
C2S C3S C4S O1S 22(3) . . . . ? 
 
_diffrn_measured_fraction_theta_max    0.951 
_diffrn_reflns_theta_full              66.73 
_diffrn_measured_fraction_theta_full   0.951 
_refine_diff_density_max    2.848 
_refine_diff_density_min   -1.025 
_refine_diff_density_rms    0.150 


#===END
 
data_66Me2bpyReC2Ph 
 
_audit_creation_method            SHELXL-97 
_chemical_name_systematic 
; 
 ? 
; 
_chemical_name_common             ? 
_chemical_melting_point           ? 
_chemical_formula_moiety          ? 
_chemical_formula_sum 
 'C24.64 H20.28 N2 O3.41 Re' 
_chemical_formula_weight          585.11 
 
loop_ 
 _atom_type_symbol 
 _atom_type_description 
 _atom_type_scat_dispersion_real 
 _atom_type_scat_dispersion_imag 
 _atom_type_scat_source 
 'C'  'C'   0.0181   0.0091 
 'International Tables Vol C Tables 4.2.6.8 and 6.1.1.4' 
 'H'  'H'   0.0000   0.0000 
 'International Tables Vol C Tables 4.2.6.8 and 6.1.1.4' 
 'N'  'N'   0.0311   0.0180 
 'International Tables Vol C Tables 4.2.6.8 and 6.1.1.4' 
 'O'  'O'   0.0492   0.0322 
 'International Tables Vol C Tables 4.2.6.8 and 6.1.1.4' 
 'Re'  'Re'  -5.2083   5.8923 
 'International Tables Vol C Tables 4.2.6.8 and 6.1.1.4' 
 
_symmetry_cell_setting            monoclinic 
_symmetry_space_group_name_H-M    'P 21/n'
 
loop_ 
 _symmetry_equiv_pos_as_xyz 
 'x, y, z' 
 '-x+1/2, y+1/2, -z+1/2' 
 '-x, -y, -z' 
 'x-1/2, -y-1/2, z-1/2' 
 
_cell_length_a                    16.52200(10) 
_cell_length_b                    13.81230(10) 
_cell_length_c                    19.5082(2) 
_cell_angle_alpha                 90.00 
_cell_angle_beta                  104.4480(10) 
_cell_angle_gamma                 90.00 
_cell_volume                      4311.11(6) 
_cell_formula_units_Z             8 
_cell_measurement_temperature     100(2) 
_cell_measurement_reflns_used     9509 
_cell_measurement_theta_min       3
_cell_measurement_theta_max       67 
 
_exptl_crystal_description        'bipyramide' 
_exptl_crystal_colour             'yellow' 
_exptl_crystal_size_max           0.39 
_exptl_crystal_size_mid           0.18 
_exptl_crystal_size_min           0.18 
_exptl_crystal_density_meas       ? 
_exptl_crystal_density_diffrn     1.803 
_exptl_crystal_density_method     'not measured' 
_exptl_crystal_F_000              2275 
_exptl_absorpt_coefficient_mu     11.284 
_exptl_absorpt_correction_type    numerical
_exptl_absorpt_correction_T_min   0.0963 
_exptl_absorpt_correction_T_max   0.2359 
_exptl_absorpt_process_details    ? 
 
_exptl_special_details 
; 
 ? 
; 
 
_diffrn_ambient_temperature       100(2) 
_diffrn_radiation_wavelength      1.54178 
_diffrn_radiation_type            CuK\a 
_diffrn_radiation_source          'fine-focus sealed tube' 
_diffrn_radiation_monochromator   graphite 
_diffrn_measurement_device_type   'Bruker APEX2 CCD detector' 
_diffrn_measurement_method        '\w scans' 
_diffrn_detector_area_resol_mean  ? 
_diffrn_standards_number          ? 
_diffrn_standards_interval_count  ? 
_diffrn_standards_interval_time   ? 
_diffrn_standards_decay_%         ? 
_diffrn_reflns_number             36319 
_diffrn_reflns_av_R_equivalents   0.0273 
_diffrn_reflns_av_sigmaI/netI     0.0190 
_diffrn_reflns_limit_h_min        -19 
_diffrn_reflns_limit_h_max        19 
_diffrn_reflns_limit_k_min        0 
_diffrn_reflns_limit_k_max        16 
_diffrn_reflns_limit_l_min        0 
_diffrn_reflns_limit_l_max        22 
_diffrn_reflns_theta_min          3.14 
_diffrn_reflns_theta_max          67.42 
_reflns_number_total              7501 
_reflns_number_gt                 7211 
_reflns_threshold_expression      >2sigma(I) 
 
_computing_data_collection        'APEX2 v2.0-2 (Bruker, 2005)' 
_computing_cell_refinement        'SAINT v7.23A (Bruker, 2005)' 
_computing_data_reduction         'SADABS-2004/1 (Bruker, 2005)' 
_computing_structure_solution     'XS/SHELXTL v6.12 (Bruker, 2001)' 
_computing_structure_refinement   'SHELXL-97 v.97-2 (Sheldrick, 1993-1997)' 
_computing_molecular_graphics     'XP v5.1 (Bruker, 1998)' 
_computing_publication_material   'XCIF v6.12 (Bruker, 2001)' 
 
_refine_special_details 
; 
 Refinement of F^2^ against ALL reflections.  The weighted R-factor wR and 
 goodness of fit S are based on F^2^, conventional R-factors R are based 
 on F, with F set to zero for negative F^2^. The threshold expression of 
 F^2^ > 2sigma(F^2^) is used only for calculating R-factors(gt) etc. and is 
 not relevant to the choice of reflections for refinement.  R-factors based 
 on F^2^ are statistically about twice as large as those based on F, and R- 
 factors based on ALL data will be even larger. 
; 
 
_refine_ls_structure_factor_coef  Fsqd  
_refine_ls_matrix_type            full 
_refine_ls_weighting_scheme       calc  
_refine_ls_weighting_details 
 'calc w=1/[\s^2^(Fo^2^)+(0.0198P)^2^+5.9653P] where P=(Fo^2^+2Fc^2^)/3' 
_atom_sites_solution_primary      direct 
_atom_sites_solution_secondary    difmap 
_atom_sites_solution_hydrogens    difmap 
_refine_ls_hydrogen_treatment     mixed 
_refine_ls_extinction_method      SHELXL 
_refine_ls_extinction_coef        0.000107(6) 
_refine_ls_extinction_expression 
 'Fc^*^=kFc[1+0.001xFc^2^\l^3^/sin(2\q)]^-1/4^' 
_refine_ls_number_reflns          7501 
_refine_ls_number_parameters      706 
_refine_ls_number_restraints      0 
_refine_ls_R_factor_all           0.0224 
_refine_ls_R_factor_gt            0.0208 
_refine_ls_wR_factor_ref          0.0477 
_refine_ls_wR_factor_gt           0.0471 
_refine_ls_goodness_of_fit_ref    1.145 
_refine_ls_restrained_S_all       1.145 
_refine_ls_shift/su_max           0.002 
_refine_ls_shift/su_mean          0.000 
 
loop_ 
 _atom_site_label 
 _atom_site_type_symbol 
 _atom_site_fract_x 
 _atom_site_fract_y 
 _atom_site_fract_z 
 _atom_site_U_iso_or_equiv 
 _atom_site_adp_type 
 _atom_site_occupancy 
 _atom_site_symmetry_multiplicity 
 _atom_site_calc_flag 
 _atom_site_refinement_flags 
 _atom_site_disorder_assembly 
 _atom_site_disorder_group 
Re1 Re 0.369601(8) 0.349289(10) 0.329380(7) 0.01359(5) Uani 1 1 d . . . 
O1 O 0.25901(15) 0.3938(2) 0.18145(13) 0.0306(6) Uani 1 1 d . . . 
O2 O 0.47224(14) 0.51430(17) 0.28872(12) 0.0223(5) Uani 1 1 d . . . 
O3 O 0.47202(17) 0.1970(2) 0.26955(15) 0.0380(7) Uani 1 1 d . . . 
N1 N 0.43178(16) 0.32310(18) 0.44191(13) 0.0142(5) Uani 1 1 d . . . 
N2 N 0.29349(16) 0.23667(18) 0.36415(13) 0.0152(5) Uani 1 1 d . . . 
C1 C 0.3003(2) 0.3746(2) 0.23636(19) 0.0215(7) Uani 1 1 d . . . 
C2 C 0.43592(19) 0.4517(2) 0.30570(16) 0.0175(7) Uani 1 1 d . . . 
C3 C 0.4348(2) 0.2525(2) 0.29210(17) 0.0207(7) Uani 1 1 d . . . 
C4 C 0.29889(18) 0.4476(2) 0.37507(16) 0.0161(6) Uani 1 1 d . . . 
C5 C 0.2583(2) 0.5003(2) 0.40328(17) 0.0187(7) Uani 1 1 d . . . 
C11 C 0.38074(19) 0.2806(2) 0.47837(17) 0.0154(6) Uani 1 1 d . . . 
C12 C 0.4017(2) 0.2782(2) 0.55201(18) 0.0188(7) Uani 1 1 d . . . 
C13 C 0.4752(2) 0.3199(2) 0.58884(18) 0.0218(7) Uani 1 1 d . . . 
C14 C 0.5285(2) 0.3589(2) 0.55225(18) 0.0201(7) Uani 1 1 d . . . 
C15 C 0.5067(2) 0.3590(2) 0.47872(18) 0.0185(7) Uani 1 1 d . . . 
C16 C 0.5668(2) 0.3974(3) 0.43944(19) 0.0211(7) Uani 1 1 d . . . 
C21 C 0.30506(19) 0.2321(2) 0.43550(17) 0.0163(6) Uani 1 1 d . . . 
C22 C 0.2529(2) 0.1784(3) 0.46638(19) 0.0225(7) Uani 1 1 d . . . 
C23 C 0.1887(2) 0.1262(3) 0.4236(2) 0.0248(8) Uani 1 1 d . . . 
C24 C 0.1794(2) 0.1264(2) 0.35202(19) 0.0232(7) Uani 1 1 d . . . 
C25 C 0.2325(2) 0.1813(2) 0.32262(17) 0.0186(7) Uani 1 1 d . . . 
C26 C 0.2225(2) 0.1776(3) 0.24425(19) 0.0261(8) Uani 1 1 d . . . 
C31 C 0.20778(19) 0.5618(2) 0.43591(16) 0.0207(7) Uani 1 1 d . . . 
C32 C 0.2161(3) 0.6623(3) 0.43583(19) 0.0273(8) Uani 1 1 d . . . 
C33 C 0.1692(3) 0.7212(3) 0.4676(2) 0.0419(11) Uani 1 1 d . . . 
C34 C 0.1114(3) 0.6809(4) 0.4997(2) 0.0502(15) Uani 1 1 d . . . 
C35 C 0.1016(2) 0.5825(4) 0.5005(2) 0.0440(12) Uani 1 1 d . . . 
C36 C 0.1489(2) 0.5219(3) 0.46879(19) 0.0296(8) Uani 1 1 d . . . 
H12 H 0.368(2) 0.250(2) 0.5746(18) 0.012(8) Uiso 1 1 d . . . 
H13 H 0.492(2) 0.317(3) 0.634(2) 0.017(9) Uiso 1 1 d . . . 
H14 H 0.580(2) 0.387(2) 0.5758(18) 0.014(8) Uiso 1 1 d . . . 
H16A H 0.617(2) 0.405(2) 0.4732(17) 0.007(8) Uiso 1 1 d . . . 
H16B H 0.552(2) 0.462(3) 0.4230(18) 0.014(8) Uiso 1 1 d . . . 
H16C H 0.568(2) 0.356(3) 0.402(2) 0.021(10) Uiso 1 1 d . . . 
H22 H 0.263(2) 0.182(3) 0.514(2) 0.031(11) Uiso 1 1 d . . . 
H23 H 0.155(2) 0.090(3) 0.442(2) 0.026(10) Uiso 1 1 d . . . 
H24 H 0.135(3) 0.085(3) 0.319(2) 0.035(11) Uiso 1 1 d . . . 
H26A H 0.189(2) 0.231(3) 0.222(2) 0.027(10) Uiso 1 1 d . . . 
H26B H 0.196(3) 0.113(3) 0.228(2) 0.032(11) Uiso 1 1 d . . . 
H26C H 0.275(3) 0.176(3) 0.234(2) 0.041(12) Uiso 1 1 d . . . 
H32 H 0.254(3) 0.686(3) 0.420(2) 0.027(11) Uiso 1 1 d . . . 
H33 H 0.172(3) 0.784(3) 0.466(2) 0.034(12) Uiso 1 1 d . . . 
H34 H 0.090(3) 0.716(4) 0.521(3) 0.064(17) Uiso 1 1 d . . . 
H35 H 0.065(3) 0.559(3) 0.526(3) 0.052(14) Uiso 1 1 d . . . 
H36 H 0.144(2) 0.457(3) 0.4704(18) 0.014(9) Uiso 1 1 d . . . 
Re2 Re 0.887244(8) 0.876655(9) 0.363617(7) 0.01159(5) Uani 1 1 d . . . 
O1A O 0.90045(15) 1.03670(17) 0.47449(12) 0.0260(5) Uani 1 1 d . . . 
O2A O 0.91222(15) 0.73794(19) 0.49014(13) 0.0299(6) Uani 1 1 d . . . 
O3A O 1.07661(14) 0.89330(18) 0.36930(13) 0.0252(5) Uani 1 1 d . . . 
N1A N 0.85978(15) 0.77243(18) 0.27473(13) 0.0143(5) Uani 1 1 d . . . 
N2A N 0.86015(15) 0.96662(18) 0.26674(13) 0.0146(5) Uani 1 1 d . . . 
C1A C 0.89620(19) 0.9771(2) 0.43268(17) 0.0175(7) Uani 1 1 d . . . 
C2A C 0.90315(19) 0.7889(2) 0.44225(18) 0.0207(7) Uani 1 1 d . . . 
C3A C 1.0073(2) 0.8844(2) 0.36836(16) 0.0160(6) Uani 1 1 d . . . 
C4A C 0.75368(19) 0.8741(2) 0.34355(16) 0.0133(6) Uani 1 1 d . . . 
C5A C 0.6793(2) 0.8743(2) 0.31967(17) 0.0163(6) Uani 1 1 d . . . 
C11A C 0.81422(19) 0.8121(2) 0.21315(17) 0.0178(7) Uani 1 1 d . . . 
C12A C 0.7734(2) 0.7553(3) 0.15722(19) 0.0265(8) Uani 1 1 d . . . 
C13A C 0.7788(2) 0.6559(3) 0.1635(2) 0.0317(9) Uani 1 1 d . . . 
C14A C 0.8290(2) 0.6162(3) 0.2235(2) 0.0278(8) Uani 1 1 d . . . 
C15A C 0.8704(2) 0.6760(2) 0.27843(18) 0.0198(7) Uani 1 1 d . . . 
C16A C 0.9280(2) 0.6312(3) 0.3419(2) 0.0249(8) Uani 1 1 d . . . 
C21A C 0.81566(19) 0.9191(2) 0.20828(16) 0.0168(6) Uani 1 1 d . . . 
C22A C 0.7787(2) 0.9674(3) 0.14614(18) 0.0238(7) Uani 1 1 d . . . 
C23A C 0.7881(2) 1.0664(3) 0.1432(2) 0.0286(8) Uani 1 1 d . . . 
C24A C 0.8374(2) 1.1136(2) 0.2005(2) 0.0254(8) Uani 1 1 d . . . 
C25A C 0.87439(19) 1.0624(2) 0.26190(18) 0.0186(7) Uani 1 1 d . . . 
C26A C 0.9323(2) 1.1136(2) 0.3220(2) 0.0239(7) Uani 1 1 d . . . 
C31A C 0.5920(2) 0.8779(2) 0.28208(18) 0.0189(7) Uani 1 1 d . . . 
C32A C 0.5289(2) 0.8988(3) 0.3154(2) 0.0282(8) Uani 1 1 d . . . 
C33A C 0.4455(2) 0.9034(3) 0.2762(3) 0.0383(10) Uani 1 1 d . . . 
C34A C 0.4252(2) 0.8867(3) 0.2040(2) 0.0346(9) Uani 1 1 d . . . 
C35A C 0.4871(2) 0.8659(3) 0.1705(2) 0.0310(9) Uani 1 1 d . . . 
C36A C 0.5697(2) 0.8617(2) 0.2087(2) 0.0243(8) Uani 1 1 d . . . 
H12A H 0.740(2) 0.783(3) 0.119(2) 0.021(9) Uiso 1 1 d . . . 
H13A H 0.750(3) 0.618(3) 0.129(3) 0.045(13) Uiso 1 1 d . . . 
H14A H 0.837(2) 0.551(3) 0.229(2) 0.033(11) Uiso 1 1 d . . . 
H16D H 0.951(3) 0.572(3) 0.327(2) 0.042(12) Uiso 1 1 d . . . 
H16E H 0.975(3) 0.668(3) 0.359(2) 0.028(10) Uiso 1 1 d . . . 
H16F H 0.900(3) 0.614(3) 0.378(2) 0.037(12) Uiso 1 1 d . . . 
H22A H 0.747(2) 0.936(2) 0.1071(18) 0.012(8) Uiso 1 1 d . . . 
H23A H 0.763(3) 1.095(3) 0.100(2) 0.035(11) Uiso 1 1 d . . . 
H24A H 0.846(2) 1.184(3) 0.205(2) 0.032(11) Uiso 1 1 d . . . 
H26D H 0.953(2) 1.173(3) 0.304(2) 0.030(10) Uiso 1 1 d . . . 
H26E H 0.975(3) 1.073(3) 0.347(2) 0.040(12) Uiso 1 1 d . . . 
H26F H 0.903(3) 1.144(3) 0.355(2) 0.030(11) Uiso 1 1 d . . . 
H32A H 0.5421(19) 0.915(2) 0.3594(18) 0.005(8) Uiso 1 1 d . . . 
H33A H 0.414(3) 0.929(3) 0.302(2) 0.046(13) Uiso 1 1 d . . . 
H34A H 0.368(3) 0.887(3) 0.174(3) 0.053(14) Uiso 1 1 d . . . 
H35A H 0.471(3) 0.858(3) 0.113(2) 0.032(11) Uiso 1 1 d . . . 
H36A H 0.618(3) 0.845(3) 0.186(2) 0.033(11) Uiso 1 1 d . . . 
O1S O 0.39024(18) 0.0326(2) 0.51002(16) 0.0273(8) Uani 0.819(5) 1 d P . . 
C1S C 0.3440(3) -0.0384(3) 0.5381(3) 0.0345(12) Uani 0.819(5) 1 d P . . 
H1SA H 0.2840 -0.0363 0.5130 0.041 Uiso 0.819(5) 1 calc PR . . 
H1SB H 0.3496 -0.0273 0.5892 0.041 Uiso 0.819(5) 1 calc PR . . 
C2S C 0.3823(3) -0.1346(3) 0.5260(3) 0.0386(13) Uani 0.819(5) 1 d P . . 
H2SA H 0.3407 -0.1876 0.5199 0.046 Uiso 0.819(5) 1 calc PR . . 
H2SC H 0.4306 -0.1508 0.5658 0.046 Uiso 0.819(5) 1 calc PR . . 
C3S C 0.4100(3) -0.1167(3) 0.4572(2) 0.0294(11) Uani 0.819(5) 1 d P . . 
H3SA H 0.3745 -0.1533 0.4171 0.035 Uiso 0.819(5) 1 calc PR . . 
H3SC H 0.4691 -0.1356 0.4628 0.035 Uiso 0.819(5) 1 calc PR . . 
C4S C 0.3985(3) -0.0064(3) 0.4453(2) 0.0277(10) Uani 0.819(5) 1 d P . . 
H4SA H 0.4476 0.0219 0.4321 0.033 Uiso 0.819(5) 1 calc PR . . 
H4SB H 0.3479 0.0073 0.4070 0.033 Uiso 0.819(5) 1 calc PR . . 
 
loop_ 
 _atom_site_aniso_label 
 _atom_site_aniso_U_11 
 _atom_site_aniso_U_22 
 _atom_site_aniso_U_33 
 _atom_site_aniso_U_23 
 _atom_site_aniso_U_13 
 _atom_site_aniso_U_12 
Re1 0.01204(7) 0.01629(8) 0.01263(8) 0.00066(5) 0.00342(5) -0.00072(5) 
O1 0.0236(13) 0.0446(15) 0.0193(13) 0.0102(11) -0.0026(11) -0.0040(12) 
O2 0.0225(12) 0.0252(12) 0.0194(12) 0.0039(10) 0.0055(10) -0.0048(10) 
O3 0.0354(15) 0.0388(15) 0.0463(17) -0.0115(13) 0.0222(13) 0.0049(13) 
N1 0.0154(13) 0.0145(12) 0.0124(13) 0.0001(10) 0.0025(10) 0.0009(10) 
N2 0.0173(13) 0.0135(12) 0.0157(14) -0.0004(10) 0.0057(11) 0.0002(10) 
C1 0.0185(16) 0.0241(17) 0.024(2) -0.0008(14) 0.0098(15) -0.0055(14) 
C2 0.0138(15) 0.0240(17) 0.0135(16) -0.0004(13) 0.0012(12) 0.0021(14) 
C3 0.0180(16) 0.0258(17) 0.0197(17) 0.0000(14) 0.0074(14) -0.0026(14) 
C4 0.0118(14) 0.0178(15) 0.0169(16) 0.0004(12) 0.0000(12) -0.0029(13) 
C5 0.0171(16) 0.0214(16) 0.0150(16) 0.0025(13) -0.0009(13) -0.0013(14) 
C11 0.0147(15) 0.0134(14) 0.0187(16) -0.0005(12) 0.0056(12) 0.0038(12) 
C12 0.0198(16) 0.0194(16) 0.0184(17) -0.0005(13) 0.0069(14) 0.0007(14) 
C13 0.0285(19) 0.0222(17) 0.0128(17) -0.0007(13) 0.0015(14) 0.0040(15) 
C14 0.0187(17) 0.0174(15) 0.0220(18) -0.0040(13) 0.0010(14) -0.0014(14) 
C15 0.0158(16) 0.0153(15) 0.0233(18) 0.0019(12) 0.0032(13) 0.0024(13) 
C16 0.0136(16) 0.0256(18) 0.0228(19) 0.0027(15) 0.0020(14) -0.0026(14) 
C21 0.0165(15) 0.0159(15) 0.0175(16) -0.0014(12) 0.0063(13) 0.0046(13) 
C22 0.0239(18) 0.0277(18) 0.0173(18) -0.0022(14) 0.0079(14) -0.0038(15) 
C23 0.0237(18) 0.0284(18) 0.025(2) 0.0000(15) 0.0112(15) -0.0081(15) 
C24 0.0209(17) 0.0239(17) 0.0256(19) -0.0063(14) 0.0070(14) -0.0080(14) 
C25 0.0182(16) 0.0187(15) 0.0179(17) -0.0023(13) 0.0027(13) 0.0001(13) 
C26 0.0279(19) 0.031(2) 0.0185(18) -0.0048(15) 0.0038(15) -0.0113(17) 
C31 0.0159(15) 0.0303(18) 0.0118(16) -0.0051(13) -0.0043(12) 0.0054(14) 
C32 0.029(2) 0.0296(19) 0.0179(18) -0.0022(15) -0.0043(16) 0.0081(17) 
C33 0.040(2) 0.042(3) 0.030(2) -0.0131(19) -0.0166(19) 0.025(2) 
C34 0.024(2) 0.085(4) 0.032(2) -0.033(3) -0.0109(18) 0.027(2) 
C35 0.0143(18) 0.093(4) 0.023(2) -0.022(2) 0.0013(15) 0.001(2) 
C36 0.0184(17) 0.050(3) 0.0174(18) -0.0077(16) -0.0020(14) -0.0017(17) 
Re2 0.01055(7) 0.01297(7) 0.01042(8) 0.00018(5) 0.00103(5) 0.00033(5) 
O1A 0.0294(13) 0.0277(13) 0.0210(13) -0.0092(11) 0.0063(10) -0.0024(11) 
O2A 0.0295(13) 0.0377(14) 0.0254(14) 0.0170(12) 0.0122(11) 0.0135(11) 
O3A 0.0144(12) 0.0347(14) 0.0268(13) 0.0028(10) 0.0058(10) 0.0003(10) 
N1A 0.0112(12) 0.0172(13) 0.0148(13) -0.0041(10) 0.0041(10) -0.0020(10) 
N2A 0.0128(12) 0.0182(13) 0.0131(13) 0.0016(10) 0.0038(10) 0.0017(10) 
C1A 0.0152(15) 0.0219(16) 0.0155(16) 0.0000(13) 0.0040(12) -0.0006(13) 
C2A 0.0146(16) 0.0249(17) 0.0230(18) 0.0016(14) 0.0056(13) 0.0043(14) 
C3A 0.0198(17) 0.0174(15) 0.0107(15) 0.0007(12) 0.0032(12) 0.0019(13) 
C4A 0.0156(16) 0.0110(14) 0.0124(15) 0.0012(11) 0.0018(12) -0.0001(12) 
C5A 0.0194(17) 0.0135(14) 0.0170(17) 0.0016(12) 0.0068(13) -0.0002(12) 
C11A 0.0133(15) 0.0241(17) 0.0166(16) -0.0021(13) 0.0046(12) 0.0007(13) 
C12A 0.0212(17) 0.035(2) 0.0208(19) -0.0071(16) 0.0013(15) -0.0003(16) 
C13A 0.0250(19) 0.035(2) 0.034(2) -0.0207(17) 0.0054(17) -0.0111(17) 
C14A 0.0242(18) 0.0199(18) 0.041(2) -0.0107(16) 0.0119(17) -0.0060(15) 
C15A 0.0167(16) 0.0186(15) 0.0271(19) -0.0015(13) 0.0114(14) -0.0008(13) 
C16A 0.0270(19) 0.0154(16) 0.031(2) 0.0022(14) 0.0052(16) 0.0026(15) 
C21A 0.0129(14) 0.0232(16) 0.0151(16) 0.0030(13) 0.0047(12) 0.0034(13) 
C22A 0.0181(16) 0.039(2) 0.0138(17) 0.0051(15) 0.0029(14) 0.0033(15) 
C23A 0.0250(18) 0.038(2) 0.025(2) 0.0175(16) 0.0100(15) 0.0116(16) 
C24A 0.0277(19) 0.0213(17) 0.032(2) 0.0115(15) 0.0164(16) 0.0074(15) 
C25A 0.0169(15) 0.0174(15) 0.0244(18) 0.0035(13) 0.0104(13) 0.0038(13) 
C26A 0.0280(19) 0.0143(16) 0.031(2) -0.0010(14) 0.0104(16) -0.0014(15) 
C31A 0.0133(15) 0.0116(14) 0.0285(19) 0.0060(13) -0.0009(13) -0.0018(12) 
C32A 0.0181(17) 0.039(2) 0.026(2) 0.0084(17) 0.0025(15) -0.0013(16) 
C33A 0.0190(19) 0.049(2) 0.049(3) 0.010(2) 0.0114(18) 0.0042(18) 
C34A 0.0220(19) 0.032(2) 0.041(2) 0.0102(17) -0.0084(17) -0.0042(16) 
C35A 0.028(2) 0.0212(17) 0.035(2) 0.0007(15) -0.0090(17) 0.0016(15) 
C36A 0.0245(18) 0.0166(16) 0.028(2) 0.0004(14) -0.0009(15) 0.0017(14) 
O1S 0.0289(16) 0.0259(16) 0.0274(17) -0.0027(13) 0.0077(13) -0.0015(13) 
C1S 0.037(3) 0.029(2) 0.043(3) -0.003(2) 0.018(2) -0.004(2) 
C2S 0.044(3) 0.032(3) 0.043(3) -0.003(2) 0.015(2) -0.003(2) 
C3S 0.030(2) 0.030(2) 0.029(3) -0.0046(19) 0.0075(19) -0.0018(19) 
C4S 0.026(2) 0.031(2) 0.027(2) 0.0022(18) 0.0074(18) 0.0042(19) 
 
_geom_special_details 
; 
 All esds (except the esd in the dihedral angle between two l.s. planes) 
 are estimated using the full covariance matrix.  The cell esds are taken 
 into account individually in the estimation of esds in distances, angles 
 and torsion angles; correlations between esds in cell parameters are only 
 used when they are defined by crystal symmetry.  An approximate (isotropic) 
 treatment of cell esds is used for estimating esds involving l.s. planes. 
; 
 
loop_ 
 _geom_bond_atom_site_label_1 
 _geom_bond_atom_site_label_2 
 _geom_bond_distance 
 _geom_bond_site_symmetry_2 
 _geom_bond_publ_flag 
Re1 C2 1.916(3) . ? 
Re1 C1 1.920(4) . ? 
Re1 C3 1.967(3) . ? 
Re1 C4 2.127(3) . ? 
Re1 N1 2.209(2) . ? 
Re1 N2 2.211(3) . ? 
O1 C1 1.149(4) . ? 
O2 C2 1.147(4) . ? 
O3 C3 1.138(4) . ? 
N1 C15 1.360(4) . ? 
N1 C11 1.364(4) . ? 
N2 C21 1.358(4) . ? 
N2 C25 1.360(4) . ? 
C4 C5 1.211(5) . ? 
C5 C31 1.445(5) . ? 
C11 C12 1.392(4) . ? 
C11 C21 1.480(4) . ? 
C12 C13 1.375(5) . ? 
C12 H12 0.88(3) . ? 
C13 C14 1.374(5) . ? 
C13 H13 0.86(4) . ? 
C14 C15 1.389(5) . ? 
C14 H14 0.94(4) . ? 
C15 C16 1.494(5) . ? 
C16 H16A 0.93(3) . ? 
C16 H16B 0.95(4) . ? 
C16 H16C 0.92(4) . ? 
C21 C22 1.384(5) . ? 
C22 C23 1.379(5) . ? 
C22 H22 0.91(4) . ? 
C23 C24 1.365(5) . ? 
C23 H23 0.89(4) . ? 
C24 C25 1.388(5) . ? 
C24 H24 1.02(4) . ? 
C25 C26 1.497(5) . ? 
C26 H26A 0.96(4) . ? 
C26 H26B 1.01(4) . ? 
C26 H26C 0.94(5) . ? 
C31 C32 1.396(5) . ? 
C31 C36 1.404(5) . ? 
C32 C33 1.373(6) . ? 
C32 H32 0.83(4) . ? 
C33 C34 1.383(8) . ? 
C33 H33 0.88(4) . ? 
C34 C35 1.369(8) . ? 
C34 H34 0.77(5) . ? 
C35 C36 1.392(6) . ? 
C35 H35 0.92(5) . ? 
C36 H36 0.90(3) . ? 
Re2 C1A 1.914(3) . ? 
Re2 C2A 1.921(3) . ? 
Re2 C3A 1.966(3) . ? 
Re2 C4A 2.143(3) . ? 
Re2 N1A 2.212(2) . ? 
Re2 N2A 2.212(3) . ? 
O1A C1A 1.149(4) . ? 
O2A C2A 1.149(4) . ? 
O3A C3A 1.147(4) . ? 
N1A C15A 1.343(4) . ? 
N1A C11A 1.364(4) . ? 
N2A C25A 1.351(4) . ? 
N2A C21A 1.361(4) . ? 
C4A C5A 1.201(4) . ? 
C5A C31A 1.446(4) . ? 
C11A C12A 1.376(5) . ? 
C11A C21A 1.481(4) . ? 
C12A C13A 1.380(5) . ? 
C12A H12A 0.89(4) . ? 
C13A C14A 1.370(6) . ? 
C13A H13A 0.89(5) . ? 
C14A C15A 1.390(5) . ? 
C14A H14A 0.91(4) . ? 
C15A C16A 1.494(5) . ? 
C16A H16D 0.97(5) . ? 
C16A H16E 0.92(4) . ? 
C16A H16F 0.96(4) . ? 
C21A C22A 1.385(5) . ? 
C22A C23A 1.378(5) . ? 
C22A H22A 0.92(3) . ? 
C23A C24A 1.372(6) . ? 
C23A H23A 0.92(4) . ? 
C24A C25A 1.394(5) . ? 
C24A H24A 0.99(4) . ? 
C25A C26A 1.494(5) . ? 
C26A H26D 0.99(4) . ? 
C26A H26E 0.94(5) . ? 
C26A H26F 0.98(4) . ? 
C31A C32A 1.390(5) . ? 
C31A C36A 1.404(5) . ? 
C32A C33A 1.401(5) . ? 
C32A H32A 0.86(3) . ? 
C33A C34A 1.382(6) . ? 
C33A H33A 0.88(5) . ? 
C34A C35A 1.375(6) . ? 
C34A H34A 0.98(5) . ? 
C35A C36A 1.382(5) . ? 
C35A H35A 1.09(4) . ? 
C36A H36A 1.03(4) . ? 
O1S C4S 1.410(5) . ? 
O1S C1S 1.433(5) . ? 
C1S C2S 1.516(6) . ? 
C1S H1SA 0.9900 . ? 
C1S H1SB 0.9900 . ? 
C2S C3S 1.543(7) . ? 
C2S H2SA 0.9900 . ? 
C2S H2SC 0.9900 . ? 
C3S C4S 1.546(6) . ? 
C3S H3SA 0.9900 . ? 
C3S H3SC 0.9900 . ? 
C4S H4SA 0.9900 . ? 
C4S H4SB 0.9900 . ? 
 
loop_ 
 _geom_angle_atom_site_label_1 
 _geom_angle_atom_site_label_2 
 _geom_angle_atom_site_label_3 
 _geom_angle 
 _geom_angle_site_symmetry_1 
 _geom_angle_site_symmetry_3 
 _geom_angle_publ_flag 
C2 Re1 C1 83.09(13) . . ? 
C2 Re1 C3 90.80(13) . . ? 
C1 Re1 C3 91.51(14) . . ? 
C2 Re1 C4 92.08(13) . . ? 
C1 Re1 C4 91.13(13) . . ? 
C3 Re1 C4 176.30(13) . . ? 
C2 Re1 N1 102.03(11) . . ? 
C1 Re1 N1 171.30(12) . . ? 
C3 Re1 N1 95.41(12) . . ? 
C4 Re1 N1 81.72(10) . . ? 
C2 Re1 N2 175.77(11) . . ? 
C1 Re1 N2 99.63(12) . . ? 
C3 Re1 N2 92.35(12) . . ? 
C4 Re1 N2 84.65(10) . . ? 
N1 Re1 N2 74.87(9) . . ? 
C15 N1 C11 118.8(3) . . ? 
C15 N1 Re1 127.0(2) . . ? 
C11 N1 Re1 113.20(19) . . ? 
C21 N2 C25 118.6(3) . . ? 
C21 N2 Re1 113.7(2) . . ? 
C25 N2 Re1 127.3(2) . . ? 
O1 C1 Re1 177.1(3) . . ? 
O2 C2 Re1 176.5(3) . . ? 
O3 C3 Re1 179.0(3) . . ? 
C5 C4 Re1 177.0(3) . . ? 
C4 C5 C31 178.4(3) . . ? 
N1 C11 C12 121.5(3) . . ? 
N1 C11 C21 116.4(3) . . ? 
C12 C11 C21 122.0(3) . . ? 
C13 C12 C11 119.3(3) . . ? 
C13 C12 H12 121(2) . . ? 
C11 C12 H12 120(2) . . ? 
C14 C13 C12 119.4(3) . . ? 
C14 C13 H13 118(2) . . ? 
C12 C13 H13 122(2) . . ? 
C13 C14 C15 120.1(3) . . ? 
C13 C14 H14 121(2) . . ? 
C15 C14 H14 118(2) . . ? 
N1 C15 C14 120.8(3) . . ? 
N1 C15 C16 119.5(3) . . ? 
C14 C15 C16 119.7(3) . . ? 
C15 C16 H16A 105(2) . . ? 
C15 C16 H16B 111(2) . . ? 
H16A C16 H16B 104(3) . . ? 
C15 C16 H16C 110(2) . . ? 
H16A C16 H16C 115(3) . . ? 
H16B C16 H16C 111(3) . . ? 
N2 C21 C22 121.8(3) . . ? 
N2 C21 C11 116.2(3) . . ? 
C22 C21 C11 121.8(3) . . ? 
C23 C22 C21 119.0(3) . . ? 
C23 C22 H22 125(3) . . ? 
C21 C22 H22 116(3) . . ? 
C24 C23 C22 119.5(3) . . ? 
C24 C23 H23 119(3) . . ? 
C22 C23 H23 121(3) . . ? 
C23 C24 C25 120.1(3) . . ? 
C23 C24 H24 121(2) . . ? 
C25 C24 H24 118(2) . . ? 
N2 C25 C24 120.8(3) . . ? 
N2 C25 C26 120.3(3) . . ? 
C24 C25 C26 118.9(3) . . ? 
C25 C26 H26A 110(2) . . ? 
C25 C26 H26B 106(2) . . ? 
H26A C26 H26B 112(3) . . ? 
C25 C26 H26C 111(3) . . ? 
H26A C26 H26C 113(4) . . ? 
H26B C26 H26C 105(3) . . ? 
C32 C31 C36 118.1(3) . . ? 
C32 C31 C5 121.1(3) . . ? 
C36 C31 C5 120.8(3) . . ? 
C33 C32 C31 121.4(4) . . ? 
C33 C32 H32 120(3) . . ? 
C31 C32 H32 118(3) . . ? 
C32 C33 C34 119.8(5) . . ? 
C32 C33 H33 122(3) . . ? 
C34 C33 H33 118(3) . . ? 
C35 C34 C33 120.2(4) . . ? 
C35 C34 H34 123(4) . . ? 
C33 C34 H34 116(4) . . ? 
C34 C35 C36 120.6(4) . . ? 
C34 C35 H35 117(3) . . ? 
C36 C35 H35 123(3) . . ? 
C35 C36 C31 119.9(4) . . ? 
C35 C36 H36 121(2) . . ? 
C31 C36 H36 119(2) . . ? 
C1A Re2 C2A 85.65(14) . . ? 
C1A Re2 C3A 91.57(13) . . ? 
C2A Re2 C3A 93.52(13) . . ? 
C1A Re2 C4A 92.04(12) . . ? 
C2A Re2 C4A 93.73(12) . . ? 
C3A Re2 C4A 172.12(12) . . ? 
C1A Re2 N1A 171.28(11) . . ? 
C2A Re2 N1A 100.12(12) . . ? 
C3A Re2 N1A 94.57(11) . . ? 
C4A Re2 N1A 81.13(10) . . ? 
C1A Re2 N2A 99.09(12) . . ? 
C2A Re2 N2A 174.15(12) . . ? 
C3A Re2 N2A 89.79(11) . . ? 
C4A Re2 N2A 82.73(10) . . ? 
N1A Re2 N2A 74.79(9) . . ? 
C15A N1A C11A 118.8(3) . . ? 
C15A N1A Re2 127.2(2) . . ? 
C11A N1A Re2 112.9(2) . . ? 
C25A N2A C21A 118.7(3) . . ? 
C25A N2A Re2 127.4(2) . . ? 
C21A N2A Re2 113.4(2) . . ? 
O1A C1A Re2 178.8(3) . . ? 
O2A C2A Re2 178.5(3) . . ? 
O3A C3A Re2 176.5(3) . . ? 
C5A C4A Re2 168.1(3) . . ? 
C4A C5A C31A 172.4(3) . . ? 
N1A C11A C12A 121.5(3) . . ? 
N1A C11A C21A 116.3(3) . . ? 
C12A C11A C21A 122.0(3) . . ? 
C11A C12A C13A 119.3(4) . . ? 
C11A C12A H12A 119(2) . . ? 
C13A C12A H12A 121(2) . . ? 
C14A C13A C12A 119.1(3) . . ? 
C14A C13A H13A 120(3) . . ? 
C12A C13A H13A 120(3) . . ? 
C13A C14A C15A 119.9(3) . . ? 
C13A C14A H14A 122(3) . . ? 
C15A C14A H14A 118(3) . . ? 
N1A C15A C14A 121.0(3) . . ? 
N1A C15A C16A 120.2(3) . . ? 
C14A C15A C16A 118.8(3) . . ? 
C15A C16A H16D 108(3) . . ? 
C15A C16A H16E 112(2) . . ? 
H16D C16A H16E 102(3) . . ? 
C15A C16A H16F 113(3) . . ? 
H16D C16A H16F 108(3) . . ? 
H16E C16A H16F 112(3) . . ? 
N2A C21A C22A 121.9(3) . . ? 
N2A C21A C11A 116.2(3) . . ? 
C22A C21A C11A 121.8(3) . . ? 
C23A C22A C21A 119.0(3) . . ? 
C23A C22A H22A 119(2) . . ? 
C21A C22A H22A 122(2) . . ? 
C24A C23A C22A 119.2(3) . . ? 
C24A C23A H23A 125(3) . . ? 
C22A C23A H23A 116(3) . . ? 
C23A C24A C25A 120.2(3) . . ? 
C23A C24A H24A 126(2) . . ? 
C25A C24A H24A 113(2) . . ? 
N2A C25A C24A 120.6(3) . . ? 
N2A C25A C26A 119.8(3) . . ? 
C24A C25A C26A 119.5(3) . . ? 
C25A C26A H26D 109(2) . . ? 
C25A C26A H26E 112(3) . . ? 
H26D C26A H26E 113(3) . . ? 
C25A C26A H26F 113(2) . . ? 
H26D C26A H26F 99(3) . . ? 
H26E C26A H26F 110(3) . . ? 
C32A C31A C36A 118.2(3) . . ? 
C32A C31A C5A 122.6(3) . . ? 
C36A C31A C5A 119.1(3) . . ? 
C31A C32A C33A 120.2(4) . . ? 
C31A C32A H32A 119(2) . . ? 
C33A C32A H32A 120(2) . . ? 
C34A C33A C32A 120.3(4) . . ? 
C34A C33A H33A 129(3) . . ? 
C32A C33A H33A 110(3) . . ? 
C35A C34A C33A 120.0(4) . . ? 
C35A C34A H34A 117(3) . . ? 
C33A C34A H34A 123(3) . . ? 
C34A C35A C36A 120.1(4) . . ? 
C34A C35A H35A 120(2) . . ? 
C36A C35A H35A 120(2) . . ? 
C35A C36A C31A 121.1(4) . . ? 
C35A C36A H36A 123(2) . . ? 
C31A C36A H36A 116(2) . . ? 
C4S O1S C1S 105.1(3) . . ? 
O1S C1S C2S 104.9(4) . . ? 
O1S C1S H1SA 110.8 . . ? 
C2S C1S H1SA 110.8 . . ? 
O1S C1S H1SB 110.8 . . ? 
C2S C1S H1SB 110.8 . . ? 
H1SA C1S H1SB 108.8 . . ? 
C1S C2S C3S 102.7(4) . . ? 
C1S C2S H2SA 111.2 . . ? 
C3S C2S H2SA 111.2 . . ? 
C1S C2S H2SC 111.2 . . ? 
C3S C2S H2SC 111.2 . . ? 
H2SA C2S H2SC 109.1 . . ? 
C2S C3S C4S 103.7(4) . . ? 
C2S C3S H3SA 111.0 . . ? 
C4S C3S H3SA 111.0 . . ? 
C2S C3S H3SC 111.0 . . ? 
C4S C3S H3SC 111.0 . . ? 
H3SA C3S H3SC 109.0 . . ? 
O1S C4S C3S 106.1(3) . . ? 
O1S C4S H4SA 110.5 . . ? 
C3S C4S H4SA 110.5 . . ? 
O1S C4S H4SB 110.5 . . ? 
C3S C4S H4SB 110.5 . . ? 
H4SA C4S H4SB 108.7 . . ? 
 
loop_ 
 _geom_torsion_atom_site_label_1 
 _geom_torsion_atom_site_label_2 
 _geom_torsion_atom_site_label_3 
 _geom_torsion_atom_site_label_4 
 _geom_torsion 
 _geom_torsion_site_symmetry_1 
 _geom_torsion_site_symmetry_2 
 _geom_torsion_site_symmetry_3 
 _geom_torsion_site_symmetry_4 
 _geom_torsion_publ_flag 
C2 Re1 N1 C15 -10.9(3) . . . . ? 
C1 Re1 N1 C15 -136.3(7) . . . . ? 
C3 Re1 N1 C15 81.1(3) . . . . ? 
C4 Re1 N1 C15 -101.3(3) . . . . ? 
N2 Re1 N1 C15 172.0(3) . . . . ? 
C2 Re1 N1 C11 156.9(2) . . . . ? 
C1 Re1 N1 C11 31.4(8) . . . . ? 
C3 Re1 N1 C11 -111.2(2) . . . . ? 
C4 Re1 N1 C11 66.5(2) . . . . ? 
N2 Re1 N1 C11 -20.2(2) . . . . ? 
C2 Re1 N2 C21 -23.7(16) . . . . ? 
C1 Re1 N2 C21 -153.5(2) . . . . ? 
C3 Re1 N2 C21 114.6(2) . . . . ? 
C4 Re1 N2 C21 -63.2(2) . . . . ? 
N1 Re1 N2 C21 19.6(2) . . . . ? 
C2 Re1 N2 C25 148.9(14) . . . . ? 
C1 Re1 N2 C25 19.1(3) . . . . ? 
C3 Re1 N2 C25 -72.8(3) . . . . ? 
C4 Re1 N2 C25 109.3(3) . . . . ? 
N1 Re1 N2 C25 -167.8(3) . . . . ? 
C2 Re1 C1 O1 -49(6) . . . . ? 
C3 Re1 C1 O1 -140(6) . . . . ? 
C4 Re1 C1 O1 43(6) . . . . ? 
N1 Re1 C1 O1 77(6) . . . . ? 
N2 Re1 C1 O1 127(6) . . . . ? 
C1 Re1 C2 O2 15(5) . . . . ? 
C3 Re1 C2 O2 106(5) . . . . ? 
C4 Re1 C2 O2 -76(5) . . . . ? 
N1 Re1 C2 O2 -158(5) . . . . ? 
N2 Re1 C2 O2 -115(5) . . . . ? 
C2 Re1 C3 O3 -68(17) . . . . ? 
C1 Re1 C3 O3 15(17) . . . . ? 
C4 Re1 C3 O3 151(16) . . . . ? 
N1 Re1 C3 O3 -170(100) . . . . ? 
N2 Re1 C3 O3 115(17) . . . . ? 
C2 Re1 C4 C5 -148(5) . . . . ? 
C1 Re1 C4 C5 129(5) . . . . ? 
C3 Re1 C4 C5 -7(6) . . . . ? 
N1 Re1 C4 C5 -46(5) . . . . ? 
N2 Re1 C4 C5 29(5) . . . . ? 
Re1 C4 C5 C31 -77(15) . . . . ? 
C15 N1 C11 C12 3.6(4) . . . . ? 
Re1 N1 C11 C12 -165.3(2) . . . . ? 
C15 N1 C11 C21 -172.6(3) . . . . ? 
Re1 N1 C11 C21 18.5(3) . . . . ? 
N1 C11 C12 C13 0.3(5) . . . . ? 
C21 C11 C12 C13 176.3(3) . . . . ? 
C11 C12 C13 C14 -3.2(5) . . . . ? 
C12 C13 C14 C15 2.2(5) . . . . ? 
C11 N1 C15 C14 -4.6(4) . . . . ? 
Re1 N1 C15 C14 162.6(2) . . . . ? 
C11 N1 C15 C16 174.3(3) . . . . ? 
Re1 N1 C15 C16 -18.5(4) . . . . ? 
C13 C14 C15 N1 1.7(5) . . . . ? 
C13 C14 C15 C16 -177.1(3) . . . . ? 
C25 N2 C21 C22 -4.7(4) . . . . ? 
Re1 N2 C21 C22 168.6(2) . . . . ? 
C25 N2 C21 C11 170.1(3) . . . . ? 
Re1 N2 C21 C11 -16.6(3) . . . . ? 
N1 C11 C21 N2 -1.3(4) . . . . ? 
C12 C11 C21 N2 -177.5(3) . . . . ? 
N1 C11 C21 C22 173.5(3) . . . . ? 
C12 C11 C21 C22 -2.7(5) . . . . ? 
N2 C21 C22 C23 1.7(5) . . . . ? 
C11 C21 C22 C23 -172.8(3) . . . . ? 
C21 C22 C23 C24 1.8(5) . . . . ? 
C22 C23 C24 C25 -2.1(5) . . . . ? 
C21 N2 C25 C24 4.3(4) . . . . ? 
Re1 N2 C25 C24 -167.9(2) . . . . ? 
C21 N2 C25 C26 -174.7(3) . . . . ? 
Re1 N2 C25 C26 13.1(4) . . . . ? 
C23 C24 C25 N2 -1.0(5) . . . . ? 
C23 C24 C25 C26 178.0(3) . . . . ? 
C4 C5 C31 C32 -130(13) . . . . ? 
C4 C5 C31 C36 50(13) . . . . ? 
C36 C31 C32 C33 0.8(5) . . . . ? 
C5 C31 C32 C33 -179.1(3) . . . . ? 
C31 C32 C33 C34 -0.9(6) . . . . ? 
C32 C33 C34 C35 0.7(6) . . . . ? 
C33 C34 C35 C36 -0.5(6) . . . . ? 
C34 C35 C36 C31 0.4(5) . . . . ? 
C32 C31 C36 C35 -0.5(5) . . . . ? 
C5 C31 C36 C35 179.3(3) . . . . ? 
C1A Re2 N1A C15A -143.6(7) . . . . ? 
C2A Re2 N1A C15A -12.6(3) . . . . ? 
C3A Re2 N1A C15A 81.8(3) . . . . ? 
C4A Re2 N1A C15A -104.9(3) . . . . ? 
N2A Re2 N1A C15A 170.3(3) . . . . ? 
C1A Re2 N1A C11A 24.4(8) . . . . ? 
C2A Re2 N1A C11A 155.4(2) . . . . ? 
C3A Re2 N1A C11A -110.2(2) . . . . ? 
C4A Re2 N1A C11A 63.1(2) . . . . ? 
N2A Re2 N1A C11A -21.7(2) . . . . ? 
C1A Re2 N2A C25A 19.1(3) . . . . ? 
C2A Re2 N2A C25A 163.0(10) . . . . ? 
C3A Re2 N2A C25A -72.5(3) . . . . ? 
C4A Re2 N2A C25A 110.0(3) . . . . ? 
N1A Re2 N2A C25A -167.3(3) . . . . ? 
C1A Re2 N2A C21A -153.0(2) . . . . ? 
C2A Re2 N2A C21A -9.1(12) . . . . ? 
C3A Re2 N2A C21A 115.5(2) . . . . ? 
C4A Re2 N2A C21A -62.1(2) . . . . ? 
N1A Re2 N2A C21A 20.7(2) . . . . ? 
C2A Re2 C1A O1A -58(16) . . . . ? 
C3A Re2 C1A O1A -152(16) . . . . ? 
C4A Re2 C1A O1A 35(16) . . . . ? 
N1A Re2 C1A O1A 74(16) . . . . ? 
N2A Re2 C1A O1A 118(16) . . . . ? 
C1A Re2 C2A O2A 18(12) . . . . ? 
C3A Re2 C2A O2A 109(12) . . . . ? 
C4A Re2 C2A O2A -74(12) . . . . ? 
N1A Re2 C2A O2A -156(12) . . . . ? 
N2A Re2 C2A O2A -127(12) . . . . ? 
C1A Re2 C3A O3A -73(5) . . . . ? 
C2A Re2 C3A O3A -159(5) . . . . ? 
C4A Re2 C3A O3A 44(5) . . . . ? 
N1A Re2 C3A O3A 101(5) . . . . ? 
N2A Re2 C3A O3A 26(5) . . . . ? 
C1A Re2 C4A C5A 128.5(12) . . . . ? 
C2A Re2 C4A C5A -145.7(12) . . . . ? 
C3A Re2 C4A C5A 11.3(18) . . . . ? 
N1A Re2 C4A C5A -46.0(12) . . . . ? 
N2A Re2 C4A C5A 29.6(12) . . . . ? 
Re2 C4A C5A C31A -9(3) . . . . ? 
C15A N1A C11A C12A 5.5(5) . . . . ? 
Re2 N1A C11A C12A -163.6(3) . . . . ? 
C15A N1A C11A C21A -170.7(3) . . . . ? 
Re2 N1A C11A C21A 20.2(3) . . . . ? 
N1A C11A C12A C13A -0.2(5) . . . . ? 
C21A C11A C12A C13A 175.8(3) . . . . ? 
C11A C12A C13A C14A -4.1(6) . . . . ? 
C12A C13A C14A C15A 3.2(6) . . . . ? 
C11A N1A C15A C14A -6.5(5) . . . . ? 
Re2 N1A C15A C14A 160.8(3) . . . . ? 
C11A N1A C15A C16A 172.9(3) . . . . ? 
Re2 N1A C15A C16A -19.8(4) . . . . ? 
C13A C14A C15A N1A 2.2(5) . . . . ? 
C13A C14A C15A C16A -177.2(3) . . . . ? 
C25A N2A C21A C22A -5.7(4) . . . . ? 
Re2 N2A C21A C22A 167.1(2) . . . . ? 
C25A N2A C21A C11A 170.0(3) . . . . ? 
Re2 N2A C21A C11A -17.2(3) . . . . ? 
N1A C11A C21A N2A -2.1(4) . . . . ? 
C12A C11A C21A N2A -178.3(3) . . . . ? 
N1A C11A C21A C22A 173.6(3) . . . . ? 
C12A C11A C21A C22A -2.6(5) . . . . ? 
N2A C21A C22A C23A 0.9(5) . . . . ? 
C11A C21A C22A C23A -174.6(3) . . . . ? 
C21A C22A C23A C24A 3.3(5) . . . . ? 
C22A C23A C24A C25A -2.7(5) . . . . ? 
C21A N2A C25A C24A 6.3(4) . . . . ? 
Re2 N2A C25A C24A -165.4(2) . . . . ? 
C21A N2A C25A C26A -171.9(3) . . . . ? 
Re2 N2A C25A C26A 16.5(4) . . . . ? 
C23A C24A C25A N2A -2.2(5) . . . . ? 
C23A C24A C25A C26A 175.9(3) . . . . ? 
C4A C5A C31A C32A -153(2) . . . . ? 
C4A C5A C31A C36A 25(3) . . . . ? 
C36A C31A C32A C33A 0.1(5) . . . . ? 
C5A C31A C32A C33A 178.6(3) . . . . ? 
C31A C32A C33A C34A 0.2(6) . . . . ? 
C32A C33A C34A C35A -0.2(6) . . . . ? 
C33A C34A C35A C36A -0.1(6) . . . . ? 
C34A C35A C36A C31A 0.3(5) . . . . ? 
C32A C31A C36A C35A -0.4(5) . . . . ? 
C5A C31A C36A C35A -178.9(3) . . . . ? 
C4S O1S C1S C2S 43.3(5) . . . . ? 
O1S C1S C2S C3S -31.8(5) . . . . ? 
C1S C2S C3S C4S 9.8(5) . . . . ? 
C1S O1S C4S C3S -36.4(4) . . . . ? 
C2S C3S C4S O1S 15.4(5) . . . . ? 
 
_diffrn_measured_fraction_theta_max    0.966 
_diffrn_reflns_theta_full              67.42 
_diffrn_measured_fraction_theta_full   0.966 
_refine_diff_density_max    0.829 
_refine_diff_density_min   -0.436 
_refine_diff_density_rms    0.081 

#===END
 
data_66Me2bpyRePO2F2 
 
_audit_creation_method            SHELXL-97 
_chemical_name_systematic 
; 
 ? 
; 
_chemical_name_common             ? 
_chemical_melting_point           ? 
_chemical_formula_moiety          ? 
_chemical_formula_sum 
 'C15 H12 F2 N2 O5 P Re' 
_chemical_formula_weight          555.44 
 
loop_ 
 _atom_type_symbol 
 _atom_type_description 
 _atom_type_scat_dispersion_real 
 _atom_type_scat_dispersion_imag 
 _atom_type_scat_source 
 'C'  'C'   0.0181   0.0091 
 'International Tables Vol C Tables 4.2.6.8 and 6.1.1.4' 
 'H'  'H'   0.0000   0.0000 
 'International Tables Vol C Tables 4.2.6.8 and 6.1.1.4' 
 'N'  'N'   0.0311   0.0180 
 'International Tables Vol C Tables 4.2.6.8 and 6.1.1.4' 
 'O'  'O'   0.0492   0.0322 
 'International Tables Vol C Tables 4.2.6.8 and 6.1.1.4' 
 'F'  'F'   0.0727   0.0534 
 'International Tables Vol C Tables 4.2.6.8 and 6.1.1.4' 
 'P'  'P'   0.2955   0.4335 
 'International Tables Vol C Tables 4.2.6.8 and 6.1.1.4' 
 'Re'  'Re'  -5.2083   5.8923 
 'International Tables Vol C Tables 4.2.6.8 and 6.1.1.4' 
 
_symmetry_cell_setting            monoclinic
_symmetry_space_group_name_H-M    'P 21/n'
 
loop_ 
 _symmetry_equiv_pos_as_xyz 
 'x, y, z' 
 '-x+1/2, y+1/2, -z+1/2' 
 '-x, -y, -z' 
 'x-1/2, -y-1/2, z-1/2' 
 
_cell_length_a                    13.2407(2) 
_cell_length_b                    8.89470(10) 
_cell_length_c                    14.9325(2) 
_cell_angle_alpha                 90.00 
_cell_angle_beta                  104.3370(10) 
_cell_angle_gamma                 90.00 
_cell_volume                      1703.86(4) 
_cell_formula_units_Z             4 
_cell_measurement_temperature     100(2) 
_cell_measurement_reflns_used     6742
_cell_measurement_theta_min       4
_cell_measurement_theta_max       66 
 
_exptl_crystal_description        'block' 
_exptl_crystal_colour             'yellow'
_exptl_crystal_size_max           0.10 
_exptl_crystal_size_mid           0.09 
_exptl_crystal_size_min           0.07 
_exptl_crystal_density_meas       ? 
_exptl_crystal_density_diffrn     2.165 
_exptl_crystal_density_method     'not measured' 
_exptl_crystal_F_000              1056 
_exptl_absorpt_coefficient_mu     15.330 
_exptl_absorpt_correction_type    multi-scan 
_exptl_absorpt_correction_T_min   0.3094 
_exptl_absorpt_correction_T_max   0.4133 
_exptl_absorpt_process_details    ? 
 
_exptl_special_details 
; 
 ? 
; 
 
_diffrn_ambient_temperature       100(2) 
_diffrn_radiation_wavelength      1.54178 
_diffrn_radiation_type            CuK\a 
_diffrn_radiation_source          'fine-focus sealed tube' 
_diffrn_radiation_monochromator   graphite 
_diffrn_measurement_device_type   'Bruker APEX2 CCD detector' 
_diffrn_measurement_method        '\w scans' 
_diffrn_detector_area_resol_mean  ? 
_diffrn_standards_number          ? 
_diffrn_standards_interval_count  ? 
_diffrn_standards_interval_time   ? 
_diffrn_standards_decay_%         ? 
_diffrn_reflns_number             14090 
_diffrn_reflns_av_R_equivalents   0.0234 
_diffrn_reflns_av_sigmaI/netI     0.0170 
_diffrn_reflns_limit_h_min        -15 
_diffrn_reflns_limit_h_max        14 
_diffrn_reflns_limit_k_min        0 
_diffrn_reflns_limit_k_max        10 
_diffrn_reflns_limit_l_min        0 
_diffrn_reflns_limit_l_max        17 
_diffrn_reflns_theta_min          4.00 
_diffrn_reflns_theta_max          67.11 
_reflns_number_total              2930 
_reflns_number_gt                 2672 
_reflns_threshold_expression      >2sigma(I) 
 
_computing_data_collection        'APEX2 v2.0-2 (Bruker, 2005)' 
_computing_cell_refinement        'SAINT v7.23A (Bruker, 2005)' 
_computing_data_reduction         'SADABS-2004/1 (Bruker, 2005)' 
_computing_structure_solution     'XS/SHELXTL v6.12 (Bruker, 2001)' 
_computing_structure_refinement   'SHELXL-97 v.97-2 (Sheldrick, 1993-1997)' 
_computing_molecular_graphics     'XP v5.1 (Bruker, 1998)' 
_computing_publication_material   'XCIF v6.12 (Bruker, 2001)' 
 
_refine_special_details 
; 
 Refinement of F^2^ against ALL reflections.  The weighted R-factor wR and 
 goodness of fit S are based on F^2^, conventional R-factors R are based 
 on F, with F set to zero for negative F^2^. The threshold expression of 
 F^2^ > 2sigma(F^2^) is used only for calculating R-factors(gt) etc. and is 
 not relevant to the choice of reflections for refinement.  R-factors based 
 on F^2^ are statistically about twice as large as those based on F, and R- 
 factors based on ALL data will be even larger. 
; 
 
_refine_ls_structure_factor_coef  Fsqd  
_refine_ls_matrix_type            full 
_refine_ls_weighting_scheme       calc  
_refine_ls_weighting_details 
 'calc w=1/[\s^2^(Fo^2^)+(0.0314P)^2^+3.4055P] where P=(Fo^2^+2Fc^2^)/3' 
_atom_sites_solution_primary      direct 
_atom_sites_solution_secondary    difmap 
_atom_sites_solution_hydrogens    difmap 
_refine_ls_hydrogen_treatment     refall
_refine_ls_extinction_method      none 
_refine_ls_extinction_coef        ? 
_refine_ls_number_reflns          2930 
_refine_ls_number_parameters      283 
_refine_ls_number_restraints      0 
_refine_ls_R_factor_all           0.0274 
_refine_ls_R_factor_gt            0.0237 
_refine_ls_wR_factor_ref          0.0567 
_refine_ls_wR_factor_gt           0.0553 
_refine_ls_goodness_of_fit_ref    1.045 
_refine_ls_restrained_S_all       1.045 
_refine_ls_shift/su_max           0.002 
_refine_ls_shift/su_mean          0.000 
 
loop_ 
 _atom_site_label 
 _atom_site_type_symbol 
 _atom_site_fract_x 
 _atom_site_fract_y 
 _atom_site_fract_z 
 _atom_site_U_iso_or_equiv 
 _atom_site_adp_type 
 _atom_site_occupancy 
 _atom_site_symmetry_multiplicity 
 _atom_site_calc_flag 
 _atom_site_refinement_flags 
 _atom_site_disorder_assembly 
 _atom_site_disorder_group 
Re1 Re 0.802572(13) 0.263771(18) 1.091267(12) 0.02211(8) Uani 1 1 d . . . 
P1 P 0.64492(9) 0.08454(13) 0.91173(8) 0.0315(3) Uani 1 1 d . . . 
F1 F 0.5714(3) 0.2207(5) 0.8954(3) 0.0970(17) Uani 1 1 d . . . 
F2 F 0.5973(3) -0.0011(5) 0.9798(2) 0.0873(14) Uani 1 1 d . . . 
O1 O 0.5971(3) 0.2371(3) 1.1504(3) 0.0384(8) Uani 1 1 d . . . 
O2 O 0.8557(3) -0.0230(4) 1.2070(2) 0.0458(9) Uani 1 1 d . . . 
O3 O 0.8887(3) 0.4401(4) 1.2694(2) 0.0442(8) Uani 1 1 d . . . 
O4 O 0.7472(2) 0.1408(3) 0.96264(19) 0.0271(6) Uani 1 1 d . . . 
O5 O 0.6359(2) -0.0031(4) 0.8285(2) 0.0396(8) Uani 1 1 d . . . 
N1 N 0.9337(3) 0.2837(4) 1.0252(2) 0.0216(7) Uani 1 1 d . . . 
N2 N 0.7618(3) 0.4558(4) 0.9973(2) 0.0244(7) Uani 1 1 d . . . 
C1 C 0.6738(4) 0.2485(4) 1.1283(3) 0.0286(9) Uani 1 1 d . . . 
C2 C 0.8381(4) 0.0826(5) 1.1624(3) 0.0317(10) Uani 1 1 d . . . 
C3 C 0.8582(3) 0.3751(5) 1.2021(3) 0.0330(10) Uani 1 1 d . . . 
C11 C 0.9062(3) 0.3577(4) 0.9429(3) 0.0232(8) Uani 1 1 d . . . 
C12 C 0.9688(3) 0.3570(5) 0.8808(3) 0.0252(9) Uani 1 1 d . . . 
C13 C 1.0612(4) 0.2786(5) 0.9030(3) 0.0292(9) Uani 1 1 d . . . 
C14 C 1.0905(3) 0.2066(5) 0.9869(3) 0.0309(10) Uani 1 1 d . . . 
C15 C 1.0272(3) 0.2112(4) 1.0484(3) 0.0262(9) Uani 1 1 d . . . 
C16 C 1.0615(4) 0.1383(6) 1.1409(4) 0.0354(11) Uani 1 1 d . . . 
C21 C 0.8091(3) 0.4484(4) 0.9262(3) 0.0245(9) Uani 1 1 d . . . 
C22 C 0.7731(4) 0.5296(5) 0.8455(3) 0.0311(10) Uani 1 1 d . . . 
C23 C 0.6896(4) 0.6250(5) 0.8390(3) 0.0384(11) Uani 1 1 d . . . 
C24 C 0.6478(4) 0.6427(5) 0.9129(4) 0.0370(11) Uani 1 1 d . . . 
C25 C 0.6848(3) 0.5574(5) 0.9926(3) 0.0311(10) Uani 1 1 d . . . 
C26 C 0.6418(4) 0.5814(6) 1.0749(4) 0.0387(11) Uani 1 1 d . . . 
H12 H 0.947(4) 0.409(6) 0.823(3) 0.040(14) Uiso 1 1 d . . . 
H13 H 1.107(4) 0.277(4) 0.864(3) 0.020(11) Uiso 1 1 d . . . 
H14 H 1.147(4) 0.155(6) 1.003(3) 0.039(14) Uiso 1 1 d . . . 
H16A H 1.133(5) 0.113(6) 1.154(3) 0.044(14) Uiso 1 1 d . . . 
H16B H 1.045(5) 0.187(7) 1.179(4) 0.051(18) Uiso 1 1 d . . . 
H16C H 1.027(4) 0.040(6) 1.148(3) 0.047(15) Uiso 1 1 d . . . 
H22 H 0.806(3) 0.519(4) 0.804(3) 0.011(10) Uiso 1 1 d . . . 
H23 H 0.669(4) 0.680(6) 0.783(4) 0.047(15) Uiso 1 1 d . . . 
H24 H 0.596(4) 0.712(5) 0.911(3) 0.030(12) Uiso 1 1 d . . . 
H26A H 0.695(4) 0.570(6) 1.135(4) 0.052(16) Uiso 1 1 d . . . 
H26B H 0.591(4) 0.515(6) 1.078(4) 0.046(15) Uiso 1 1 d . . . 
H26C H 0.614(5) 0.673(8) 1.072(4) 0.061(17) Uiso 1 1 d . . . 
 
loop_ 
 _atom_site_aniso_label 
 _atom_site_aniso_U_11 
 _atom_site_aniso_U_22 
 _atom_site_aniso_U_33 
 _atom_site_aniso_U_23 
 _atom_site_aniso_U_13 
 _atom_site_aniso_U_12 
Re1 0.02221(11) 0.02236(11) 0.02137(11) -0.00072(7) 0.00464(7) 0.00108(7) 
P1 0.0236(6) 0.0381(6) 0.0321(6) -0.0135(5) 0.0056(5) -0.0026(5) 
F1 0.052(2) 0.089(3) 0.120(3) -0.064(3) -0.038(2) 0.036(2) 
F2 0.097(3) 0.116(3) 0.071(2) -0.053(2) 0.062(2) -0.076(3) 
O1 0.0345(19) 0.0361(18) 0.050(2) -0.0046(14) 0.0219(16) -0.0027(13) 
O2 0.069(2) 0.0351(18) 0.0423(19) 0.0151(16) 0.0311(18) 0.0186(17) 
O3 0.042(2) 0.055(2) 0.0311(18) -0.0194(16) -0.0002(15) -0.0001(16) 
O4 0.0270(15) 0.0272(15) 0.0286(15) 0.0008(12) 0.0098(12) 0.0012(12) 
O5 0.0371(18) 0.0485(19) 0.0326(17) -0.0152(15) 0.0076(14) -0.0046(15) 
N1 0.0186(17) 0.0228(16) 0.0220(16) -0.0022(13) 0.0026(13) -0.0012(13) 
N2 0.0204(17) 0.0226(17) 0.0272(18) 0.0025(14) 0.0001(14) -0.0007(13) 
C1 0.030(2) 0.027(2) 0.030(2) -0.0036(17) 0.0096(19) 0.0005(17) 
C2 0.037(3) 0.035(2) 0.025(2) -0.0002(19) 0.0127(19) 0.0057(19) 
C3 0.029(2) 0.032(2) 0.037(3) 0.001(2) 0.006(2) 0.0060(18) 
C11 0.021(2) 0.0208(19) 0.025(2) -0.0035(16) -0.0003(16) -0.0036(15) 
C12 0.028(2) 0.025(2) 0.020(2) -0.0037(17) 0.0033(17) -0.0054(17) 
C13 0.029(2) 0.028(2) 0.032(2) -0.0075(18) 0.0107(19) -0.0037(18) 
C14 0.018(2) 0.030(2) 0.043(3) -0.005(2) 0.0049(19) 0.0043(18) 
C15 0.022(2) 0.0222(19) 0.031(2) -0.0013(17) -0.0015(17) 0.0002(16) 
C16 0.023(3) 0.041(3) 0.037(3) 0.004(2) -0.002(2) 0.003(2) 
C21 0.021(2) 0.023(2) 0.026(2) -0.0005(16) -0.0004(17) -0.0024(16) 
C22 0.028(2) 0.035(2) 0.027(2) 0.0011(19) 0.000(2) -0.0011(19) 
C23 0.036(3) 0.034(3) 0.038(3) 0.009(2) -0.005(2) 0.002(2) 
C24 0.024(2) 0.033(2) 0.049(3) 0.007(2) 0.000(2) 0.0064(19) 
C25 0.021(2) 0.027(2) 0.043(3) 0.0000(19) 0.0037(19) 0.0007(17) 
C26 0.034(3) 0.034(3) 0.052(3) 0.004(2) 0.018(2) 0.010(2) 
 
_geom_special_details 
; 
 All esds (except the esd in the dihedral angle between two l.s. planes) 
 are estimated using the full covariance matrix.  The cell esds are taken 
 into account individually in the estimation of esds in distances, angles 
 and torsion angles; correlations between esds in cell parameters are only 
 used when they are defined by crystal symmetry.  An approximate (isotropic) 
 treatment of cell esds is used for estimating esds involving l.s. planes. 
; 
 
loop_ 
 _geom_bond_atom_site_label_1 
 _geom_bond_atom_site_label_2 
 _geom_bond_distance 
 _geom_bond_site_symmetry_2 
 _geom_bond_publ_flag 
Re1 C3 1.913(5) . ? 
Re1 C1 1.923(5) . ? 
Re1 C2 1.924(5) . ? 
Re1 O4 2.174(3) . ? 
Re1 N2 2.191(3) . ? 
Re1 N1 2.206(3) . ? 
P1 O5 1.447(3) . ? 
P1 O4 1.467(3) . ? 
P1 F2 1.526(3) . ? 
P1 F1 1.535(3) . ? 
O1 C1 1.147(6) . ? 
O2 C2 1.141(5) . ? 
O3 C3 1.143(5) . ? 
N1 C11 1.361(5) . ? 
N1 C15 1.363(5) . ? 
N2 C25 1.351(5) . ? 
N2 C21 1.360(5) . ? 
C11 C12 1.389(6) . ? 
C11 C21 1.486(5) . ? 
C12 C13 1.376(6) . ? 
C12 H12 0.96(5) . ? 
C13 C14 1.375(7) . ? 
C13 H13 0.94(5) . ? 
C14 C15 1.387(6) . ? 
C14 H14 0.86(5) . ? 
C15 C16 1.492(6) . ? 
C16 H16A 0.94(6) . ? 
C16 H16B 0.79(6) . ? 
C16 H16C 1.01(6) . ? 
C21 C22 1.384(6) . ? 
C22 C23 1.377(7) . ? 
C22 H22 0.85(4) . ? 
C23 C24 1.360(7) . ? 
C23 H23 0.95(5) . ? 
C24 C25 1.395(6) . ? 
C24 H24 0.91(5) . ? 
C25 C26 1.492(7) . ? 
C26 H26A 1.01(6) . ? 
C26 H26B 0.91(6) . ? 
C26 H26C 0.89(7) . ? 
 
loop_ 
 _geom_angle_atom_site_label_1 
 _geom_angle_atom_site_label_2 
 _geom_angle_atom_site_label_3 
 _geom_angle 
 _geom_angle_site_symmetry_1 
 _geom_angle_site_symmetry_3 
 _geom_angle_publ_flag 
C3 Re1 C1 88.06(19) . . ? 
C3 Re1 C2 88.08(18) . . ? 
C1 Re1 C2 83.99(18) . . ? 
C3 Re1 O4 176.75(15) . . ? 
C1 Re1 O4 95.13(15) . . ? 
C2 Re1 O4 92.85(15) . . ? 
C3 Re1 N2 97.54(16) . . ? 
C1 Re1 N2 98.28(15) . . ? 
C2 Re1 N2 173.98(15) . . ? 
O4 Re1 N2 81.42(11) . . ? 
C3 Re1 N1 99.70(16) . . ? 
C1 Re1 N1 170.46(16) . . ? 
C2 Re1 N1 101.68(16) . . ? 
O4 Re1 N1 77.06(11) . . ? 
N2 Re1 N1 75.35(12) . . ? 
O5 P1 O4 119.88(18) . . ? 
O5 P1 F2 110.1(2) . . ? 
O4 P1 F2 107.83(19) . . ? 
O5 P1 F1 112.0(2) . . ? 
O4 P1 F1 106.29(19) . . ? 
F2 P1 F1 98.6(3) . . ? 
P1 O4 Re1 134.10(17) . . ? 
C11 N1 C15 118.8(3) . . ? 
C11 N1 Re1 112.2(3) . . ? 
C15 N1 Re1 127.9(3) . . ? 
C25 N2 C21 118.6(3) . . ? 
C25 N2 Re1 128.1(3) . . ? 
C21 N2 Re1 112.0(3) . . ? 
O1 C1 Re1 179.0(3) . . ? 
O2 C2 Re1 176.6(4) . . ? 
O3 C3 Re1 177.8(4) . . ? 
N1 C11 C12 122.0(4) . . ? 
N1 C11 C21 116.2(3) . . ? 
C12 C11 C21 121.7(4) . . ? 
C13 C12 C11 119.0(4) . . ? 
C13 C12 H12 121(3) . . ? 
C11 C12 H12 120(3) . . ? 
C14 C13 C12 119.2(4) . . ? 
C14 C13 H13 119(3) . . ? 
C12 C13 H13 122(3) . . ? 
C13 C14 C15 120.6(4) . . ? 
C13 C14 H14 122(3) . . ? 
C15 C14 H14 117(3) . . ? 
N1 C15 C14 120.4(4) . . ? 
N1 C15 C16 119.4(4) . . ? 
C14 C15 C16 120.3(4) . . ? 
C15 C16 H16A 111(3) . . ? 
C15 C16 H16B 110(4) . . ? 
H16A C16 H16B 115(5) . . ? 
C15 C16 H16C 116(3) . . ? 
H16A C16 H16C 103(4) . . ? 
H16B C16 H16C 101(5) . . ? 
N2 C21 C22 121.9(4) . . ? 
N2 C21 C11 116.2(3) . . ? 
C22 C21 C11 121.8(4) . . ? 
C23 C22 C21 118.7(4) . . ? 
C23 C22 H22 125(3) . . ? 
C21 C22 H22 117(3) . . ? 
C24 C23 C22 119.7(4) . . ? 
C24 C23 H23 125(3) . . ? 
C22 C23 H23 115(3) . . ? 
C23 C24 C25 120.1(4) . . ? 
C23 C24 H24 120(3) . . ? 
C25 C24 H24 120(3) . . ? 
N2 C25 C24 120.6(4) . . ? 
N2 C25 C26 119.3(4) . . ? 
C24 C25 C26 120.0(4) . . ? 
C25 C26 H26A 113(3) . . ? 
C25 C26 H26B 113(3) . . ? 
H26A C26 H26B 105(4) . . ? 
C25 C26 H26C 109(4) . . ? 
H26A C26 H26C 109(5) . . ? 
H26B C26 H26C 107(5) . . ? 
 
loop_ 
 _geom_torsion_atom_site_label_1 
 _geom_torsion_atom_site_label_2 
 _geom_torsion_atom_site_label_3 
 _geom_torsion_atom_site_label_4 
 _geom_torsion 
 _geom_torsion_site_symmetry_1 
 _geom_torsion_site_symmetry_2 
 _geom_torsion_site_symmetry_3 
 _geom_torsion_site_symmetry_4 
 _geom_torsion_publ_flag 
O5 P1 O4 Re1 -176.3(2) . . . . ? 
F2 P1 O4 Re1 -49.4(3) . . . . ? 
F1 P1 O4 Re1 55.6(3) . . . . ? 
C3 Re1 O4 P1 -161(2) . . . . ? 
C1 Re1 O4 P1 8.5(3) . . . . ? 
C2 Re1 O4 P1 92.7(3) . . . . ? 
N2 Re1 O4 P1 -89.1(2) . . . . ? 
N1 Re1 O4 P1 -165.9(3) . . . . ? 
C3 Re1 N1 C11 -117.9(3) . . . . ? 
C1 Re1 N1 C11 26.3(10) . . . . ? 
C2 Re1 N1 C11 152.1(3) . . . . ? 
O4 Re1 N1 C11 61.8(2) . . . . ? 
N2 Re1 N1 C11 -22.5(2) . . . . ? 
C3 Re1 N1 C15 74.4(3) . . . . ? 
C1 Re1 N1 C15 -141.4(8) . . . . ? 
C2 Re1 N1 C15 -15.6(4) . . . . ? 
O4 Re1 N1 C15 -105.9(3) . . . . ? 
N2 Re1 N1 C15 169.7(3) . . . . ? 
C3 Re1 N2 C25 -70.7(4) . . . . ? 
C1 Re1 N2 C25 18.5(4) . . . . ? 
C2 Re1 N2 C25 130.2(15) . . . . ? 
O4 Re1 N2 C25 112.5(3) . . . . ? 
N1 Re1 N2 C25 -168.8(4) . . . . ? 
C3 Re1 N2 C21 122.8(3) . . . . ? 
C1 Re1 N2 C21 -148.1(3) . . . . ? 
C2 Re1 N2 C21 -36.3(16) . . . . ? 
O4 Re1 N2 C21 -54.1(3) . . . . ? 
N1 Re1 N2 C21 24.7(2) . . . . ? 
C3 Re1 C1 O1 -120(22) . . . . ? 
C2 Re1 C1 O1 -32(22) . . . . ? 
O4 Re1 C1 O1 61(22) . . . . ? 
N2 Re1 C1 O1 143(22) . . . . ? 
N1 Re1 C1 O1 95(22) . . . . ? 
C3 Re1 C2 O2 66(7) . . . . ? 
C1 Re1 C2 O2 -23(7) . . . . ? 
O4 Re1 C2 O2 -118(7) . . . . ? 
N2 Re1 C2 O2 -135(7) . . . . ? 
N1 Re1 C2 O2 165(7) . . . . ? 
C1 Re1 C3 O3 15(10) . . . . ? 
C2 Re1 C3 O3 -70(10) . . . . ? 
O4 Re1 C3 O3 -176(9) . . . . ? 
N2 Re1 C3 O3 113(10) . . . . ? 
N1 Re1 C3 O3 -171(10) . . . . ? 
C15 N1 C11 C12 2.2(5) . . . . ? 
Re1 N1 C11 C12 -166.7(3) . . . . ? 
C15 N1 C11 C21 -173.4(3) . . . . ? 
Re1 N1 C11 C21 17.6(4) . . . . ? 
N1 C11 C12 C13 0.4(6) . . . . ? 
C21 C11 C12 C13 175.8(4) . . . . ? 
C11 C12 C13 C14 -1.8(6) . . . . ? 
C12 C13 C14 C15 0.7(6) . . . . ? 
C11 N1 C15 C14 -3.3(6) . . . . ? 
Re1 N1 C15 C14 163.7(3) . . . . ? 
C11 N1 C15 C16 176.0(4) . . . . ? 
Re1 N1 C15 C16 -17.0(5) . . . . ? 
C13 C14 C15 N1 1.9(6) . . . . ? 
C13 C14 C15 C16 -177.4(4) . . . . ? 
C25 N2 C21 C22 -7.2(6) . . . . ? 
Re1 N2 C21 C22 160.7(3) . . . . ? 
C25 N2 C21 C11 168.2(3) . . . . ? 
Re1 N2 C21 C11 -23.8(4) . . . . ? 
N1 C11 C21 N2 4.1(5) . . . . ? 
C12 C11 C21 N2 -171.5(4) . . . . ? 
N1 C11 C21 C22 179.6(4) . . . . ? 
C12 C11 C21 C22 3.9(6) . . . . ? 
N2 C21 C22 C23 2.7(6) . . . . ? 
C11 C21 C22 C23 -172.5(4) . . . . ? 
C21 C22 C23 C24 3.1(7) . . . . ? 
C22 C23 C24 C25 -4.3(7) . . . . ? 
C21 N2 C25 C24 6.0(6) . . . . ? 
Re1 N2 C25 C24 -159.8(3) . . . . ? 
C21 N2 C25 C26 -171.9(4) . . . . ? 
Re1 N2 C25 C26 22.3(6) . . . . ? 
C23 C24 C25 N2 -0.3(7) . . . . ? 
C23 C24 C25 C26 177.6(5) . . . . ? 
 
_diffrn_measured_fraction_theta_max    0.960 
_diffrn_reflns_theta_full              67.11 
_diffrn_measured_fraction_theta_full   0.960 
_refine_diff_density_max    1.144 
_refine_diff_density_min   -0.477 
_refine_diff_density_rms    0.101 

#===END
 
data_44Me2bpyRe_C2pzAn 
 
_audit_creation_method            SHELXL-97 
_chemical_name_systematic 
; 
 ? 
; 
_chemical_name_common             ? 
_chemical_melting_point           ? 
_chemical_formula_moiety          ? 
_chemical_formula_sum 
 'C27 H22 N5 O3 Re' 
_chemical_formula_weight          650.70 
 
loop_ 
 _atom_type_symbol 
 _atom_type_description 
 _atom_type_scat_dispersion_real 
 _atom_type_scat_dispersion_imag 
 _atom_type_scat_source 
 'C'  'C'   0.0181   0.0091 
 'International Tables Vol C Tables 4.2.6.8 and 6.1.1.4' 
 'H'  'H'   0.0000   0.0000 
 'International Tables Vol C Tables 4.2.6.8 and 6.1.1.4' 
 'N'  'N'   0.0311   0.0180 
 'International Tables Vol C Tables 4.2.6.8 and 6.1.1.4' 
 'O'  'O'   0.0492   0.0322 
 'International Tables Vol C Tables 4.2.6.8 and 6.1.1.4' 
 'Re'  'Re'  -5.2083   5.8923 
 'International Tables Vol C Tables 4.2.6.8 and 6.1.1.4' 
 
_symmetry_cell_setting            'monoclinic' 
_symmetry_space_group_name_H-M    'C 2/c' 
 
loop_ 
 _symmetry_equiv_pos_as_xyz 
 'x, y, z' 
 '-x, y, -z+1/2' 
 'x+1/2, y+1/2, z' 
 '-x+1/2, y+1/2, -z+1/2' 
 '-x, -y, -z' 
 'x, -y, z-1/2' 
 '-x+1/2, -y+1/2, -z' 
 'x+1/2, -y+1/2, z-1/2' 
 
_cell_length_a                    16.4742(4) 
_cell_length_b                    14.2705(3) 
_cell_length_c                    21.3045(5) 
_cell_angle_alpha                 90.00 
_cell_angle_beta                  91.8490(10) 
_cell_angle_gamma                 90.00 
_cell_volume                      5006.0(2) 
_cell_formula_units_Z             8 
_cell_measurement_temperature     100(2) 
_cell_measurement_reflns_used     9569 
_cell_measurement_theta_min       4 
_cell_measurement_theta_max       60 
 
_exptl_crystal_description        'plate' 
_exptl_crystal_colour             'yellow' 
_exptl_crystal_size_max           0.14 
_exptl_crystal_size_mid           0.12 
_exptl_crystal_size_min           0.04 
_exptl_crystal_density_meas       ? 
_exptl_crystal_density_diffrn     1.727 
_exptl_crystal_density_method     'not measured' 
_exptl_crystal_F_000              2544 
_exptl_absorpt_coefficient_mu     9.815 
_exptl_absorpt_correction_type    multi-scan 
_exptl_absorpt_correction_T_min   0.3403 
_exptl_absorpt_correction_T_max   0.6949 
_exptl_absorpt_process_details    ? 
 
_exptl_special_details 
; 
 ? 
; 
 
_diffrn_ambient_temperature       100(2) 
_diffrn_radiation_wavelength      1.54178 
_diffrn_radiation_type            CuK\a 
_diffrn_radiation_source          'fine-focus sealed tube' 
_diffrn_radiation_monochromator   graphite 
_diffrn_measurement_device_type   'Bruker APEX2 CCD detector' 
_diffrn_measurement_method        '\w scans' 
_diffrn_detector_area_resol_mean  ? 
_diffrn_standards_number          ? 
_diffrn_standards_interval_count  ? 
_diffrn_standards_interval_time   ? 
_diffrn_standards_decay_%         ? 
_diffrn_reflns_number             20107 
_diffrn_reflns_av_R_equivalents   0.0348 
_diffrn_reflns_av_sigmaI/netI     0.0244 
_diffrn_reflns_limit_h_min        -18 
_diffrn_reflns_limit_h_max        18 
_diffrn_reflns_limit_k_min        0 
_diffrn_reflns_limit_k_max        16 
_diffrn_reflns_limit_l_min        0 
_diffrn_reflns_limit_l_max        24 
_diffrn_reflns_theta_min          4.10 
_diffrn_reflns_theta_max          61.14 
_reflns_number_total              3751 
_reflns_number_gt                 3469 
_reflns_threshold_expression      >2sigma(I) 
 
_computing_data_collection        'APEX2 v2.0-2 (Bruker, 2005)' 
_computing_cell_refinement        'SAINT v7.23A (Bruker, 2005)' 
_computing_data_reduction         'SADABS-2004/1 (Bruker, 2005)' 
_computing_structure_solution     'XS/SHELXTL v6.12 (Bruker, 2001)' 
_computing_structure_refinement   'SHELXL-97 v.97-2 (Sheldrick, 1993-1997)' 
_computing_molecular_graphics     'XP v5.1 (Bruker, 1998)' 
_computing_publication_material   'XCIF v6.12 (Bruker, 2001)' 
 
_refine_special_details 
; 
 Refinement of F^2^ against ALL reflections.  The weighted R-factor wR and 
 goodness of fit S are based on F^2^, conventional R-factors R are based 
 on F, with F set to zero for negative F^2^. The threshold expression of 
 F^2^ > 2sigma(F^2^) is used only for calculating R-factors(gt) etc. and is 
 not relevant to the choice of reflections for refinement.  R-factors based 
 on F^2^ are statistically about twice as large as those based on F, and R- 
 factors based on ALL data will be even larger. 
; 
 
_refine_ls_structure_factor_coef  Fsqd  
_refine_ls_matrix_type            full 
_refine_ls_weighting_scheme       calc  
_refine_ls_weighting_details 
 'calc w=1/[\s^2^(Fo^2^)+(0.0272P)^2^+23.2938P] where P=(Fo^2^+2Fc^2^)/3' 
_atom_sites_solution_primary      direct 
_atom_sites_solution_secondary    difmap 
_atom_sites_solution_hydrogens    difmap
_refine_ls_hydrogen_treatment     refall 
_refine_ls_extinction_method      none 
_refine_ls_extinction_coef        ? 
_refine_ls_number_reflns          3751 
_refine_ls_number_parameters      413 
_refine_ls_number_restraints      0 
_refine_ls_R_factor_all           0.0330 
_refine_ls_R_factor_gt            0.0285 
_refine_ls_wR_factor_ref          0.0622 
_refine_ls_wR_factor_gt           0.0606 
_refine_ls_goodness_of_fit_ref    1.123 
_refine_ls_restrained_S_all       1.123 
_refine_ls_shift/su_max           0.001 
_refine_ls_shift/su_mean          0.000 
 
loop_ 
 _atom_site_label 
 _atom_site_type_symbol 
 _atom_site_fract_x 
 _atom_site_fract_y 
 _atom_site_fract_z 
 _atom_site_U_iso_or_equiv 
 _atom_site_adp_type 
 _atom_site_occupancy 
 _atom_site_symmetry_multiplicity 
 _atom_site_calc_flag 
 _atom_site_refinement_flags 
 _atom_site_disorder_assembly 
 _atom_site_disorder_group 
Re1 Re 0.153379(11) 0.514754(13) 0.329713(9) 0.01848(8) Uani 1 1 d . . . 
O1 O 0.0382(2) 0.3460(2) 0.31462(17) 0.0364(9) Uani 1 1 d . . . 
O2 O 0.2746(2) 0.4189(3) 0.24451(17) 0.0383(9) Uani 1 1 d . . . 
O3 O 0.0785(2) 0.6119(3) 0.21048(17) 0.0385(9) Uani 1 1 d . . . 
N1 N 0.2265(2) 0.6376(3) 0.35444(18) 0.0221(9) Uani 1 1 d . . . 
N2 N 0.0819(2) 0.5949(3) 0.39562(17) 0.0197(8) Uani 1 1 d . . . 
N3 N 0.3624(3) 0.5489(3) 0.4993(2) 0.0256(9) Uani 1 1 d . . . 
N4 N 0.4418(2) 0.5309(3) 0.61814(18) 0.0273(9) Uani 1 1 d . . . 
N5 N 0.5101(3) 0.5318(3) 0.5842(2) 0.0384(11) Uani 1 1 d . . . 
C1 C 0.0816(3) 0.4092(4) 0.3188(2) 0.0292(12) Uani 1 1 d . . . 
C2 C 0.2287(3) 0.4533(3) 0.2765(2) 0.0258(11) Uani 1 1 d . . . 
C3 C 0.1050(3) 0.5775(3) 0.2550(2) 0.0258(11) Uani 1 1 d . . . 
C4 C 0.3011(3) 0.6549(4) 0.3319(2) 0.0254(11) Uani 1 1 d . . . 
C5 C 0.3423(3) 0.7377(4) 0.3459(2) 0.0319(12) Uani 1 1 d . . . 
C6 C 0.3074(3) 0.8062(3) 0.3833(2) 0.0298(12) Uani 1 1 d . . . 
C7 C 0.2328(3) 0.7846(4) 0.4078(2) 0.0290(12) Uani 1 1 d . . . 
C8 C 0.1939(3) 0.7010(3) 0.3934(2) 0.0232(10) Uani 1 1 d . . . 
C9 C 0.1144(3) 0.6761(3) 0.4180(2) 0.0217(10) Uani 1 1 d . . . 
C10 C 0.0755(3) 0.7284(4) 0.4628(2) 0.0275(11) Uani 1 1 d . . . 
C11 C 0.0018(3) 0.6989(3) 0.4862(2) 0.0249(11) Uani 1 1 d . . . 
C12 C -0.0294(3) 0.6153(3) 0.4632(2) 0.0240(11) Uani 1 1 d . . . 
C13 C 0.0111(3) 0.5666(3) 0.4180(2) 0.0237(10) Uani 1 1 d . . . 
C14 C 0.3475(4) 0.8981(5) 0.3951(4) 0.0428(15) Uani 1 1 d . . . 
C15 C -0.0406(4) 0.7556(5) 0.5344(3) 0.0356(13) Uani 1 1 d . . . 
C16 C 0.2050(3) 0.4565(3) 0.4144(2) 0.0197(10) Uani 1 1 d . . . 
C17 C 0.2325(3) 0.4323(3) 0.4645(2) 0.0205(10) Uani 1 1 d . . . 
C18 C 0.2725(3) 0.4196(3) 0.5248(2) 0.0213(10) Uani 1 1 d . . . 
C19 C 0.3383(3) 0.4793(3) 0.5409(2) 0.0220(10) Uani 1 1 d . . . 
C20 C 0.3756(3) 0.4693(3) 0.6005(2) 0.0251(11) Uani 1 1 d . . . 
C21 C 0.3499(3) 0.4024(3) 0.6426(2) 0.0254(11) Uani 1 1 d . . . 
C22 C 0.2863(3) 0.3426(3) 0.6275(2) 0.0248(11) Uani 1 1 d . . . 
C23 C 0.2488(3) 0.3520(3) 0.5684(2) 0.0233(11) Uani 1 1 d . . . 
C24 C 0.2591(4) 0.2682(4) 0.6715(3) 0.0316(12) Uani 1 1 d . . . 
C25 C 0.5577(3) 0.5945(4) 0.6132(3) 0.0384(14) Uani 1 1 d . . . 
C26 C 0.5214(3) 0.6334(4) 0.6651(2) 0.0367(13) Uani 1 1 d . . . 
C27 C 0.4477(3) 0.5908(4) 0.6666(3) 0.0341(13) Uani 1 1 d . . . 
H3NA H 0.343(4) 0.544(4) 0.465(3) 0.041(19) Uiso 1 1 d . . . 
H3NB H 0.408(3) 0.552(3) 0.4955(19) 0.002(12) Uiso 1 1 d . . . 
H4 H 0.319(2) 0.607(3) 0.3106(19) 0.004(10) Uiso 1 1 d . . . 
H5 H 0.395(3) 0.750(3) 0.326(2) 0.019(12) Uiso 1 1 d . . . 
H7 H 0.208(3) 0.829(4) 0.435(3) 0.048(17) Uiso 1 1 d . . . 
H10 H 0.095(3) 0.783(3) 0.474(2) 0.015(12) Uiso 1 1 d . . . 
H12 H -0.072(3) 0.592(3) 0.480(2) 0.024(13) Uiso 1 1 d . . . 
H13 H -0.007(2) 0.504(3) 0.3995(18) 0.001(9) Uiso 1 1 d . . . 
H14A H 0.333(5) 0.948(7) 0.371(4) 0.10(3) Uiso 1 1 d . . . 
H14B H 0.398(4) 0.890(5) 0.383(3) 0.06(2) Uiso 1 1 d . . . 
H14C H 0.347(4) 0.915(5) 0.436(3) 0.06(2) Uiso 1 1 d . . . 
H15A H -0.057(5) 0.808(6) 0.519(4) 0.08(3) Uiso 1 1 d . . . 
H15B H -0.074(4) 0.722(4) 0.558(3) 0.043(17) Uiso 1 1 d . . . 
H15C H -0.005(4) 0.780(4) 0.560(3) 0.05(2) Uiso 1 1 d . . . 
H21 H 0.375(3) 0.396(3) 0.678(2) 0.019(13) Uiso 1 1 d . . . 
H23 H 0.212(3) 0.317(3) 0.559(2) 0.005(11) Uiso 1 1 d . . . 
H24A H 0.255(3) 0.215(4) 0.657(2) 0.029(15) Uiso 1 1 d . . . 
H24B H 0.212(5) 0.282(5) 0.696(4) 0.09(3) Uiso 1 1 d . . . 
H24C H 0.304(4) 0.258(4) 0.703(3) 0.057(19) Uiso 1 1 d . . . 
H25 H 0.610(4) 0.604(4) 0.596(3) 0.044(16) Uiso 1 1 d . . . 
H26 H 0.544(3) 0.681(3) 0.690(2) 0.024(13) Uiso 1 1 d . . . 
H27 H 0.408(3) 0.599(3) 0.689(2) 0.013(12) Uiso 1 1 d . . . 
 
loop_ 
 _atom_site_aniso_label 
 _atom_site_aniso_U_11 
 _atom_site_aniso_U_22 
 _atom_site_aniso_U_33 
 _atom_site_aniso_U_23 
 _atom_site_aniso_U_13 
 _atom_site_aniso_U_12 
Re1 0.01550(12) 0.02223(13) 0.01773(12) -0.00091(9) 0.00095(8) -0.00289(9) 
O1 0.038(2) 0.034(2) 0.037(2) 0.0016(16) -0.0036(17) -0.0183(18) 
O2 0.039(2) 0.041(2) 0.036(2) -0.0034(17) 0.0152(18) 0.0034(18) 
O3 0.029(2) 0.051(2) 0.035(2) 0.0148(19) -0.0071(17) -0.0036(17) 
N1 0.020(2) 0.021(2) 0.025(2) 0.0000(17) 0.0009(17) -0.0039(17) 
N2 0.0149(19) 0.025(2) 0.019(2) 0.0002(16) 0.0012(16) 0.0030(16) 
N3 0.020(3) 0.028(2) 0.029(3) -0.0010(19) 0.001(2) -0.005(2) 
N4 0.022(2) 0.038(2) 0.022(2) -0.0056(18) 0.0012(17) -0.0045(19) 
N5 0.023(2) 0.060(3) 0.032(3) -0.014(2) 0.007(2) -0.010(2) 
C1 0.029(3) 0.038(3) 0.020(3) 0.004(2) 0.001(2) 0.001(3) 
C2 0.024(3) 0.028(3) 0.026(3) 0.005(2) 0.001(2) -0.005(2) 
C3 0.017(2) 0.028(3) 0.032(3) 0.001(2) 0.006(2) -0.008(2) 
C4 0.019(3) 0.031(3) 0.027(3) 0.001(2) 0.001(2) -0.006(2) 
C5 0.021(3) 0.040(3) 0.035(3) -0.003(2) 0.004(2) -0.005(2) 
C6 0.023(3) 0.032(3) 0.035(3) 0.005(2) 0.004(2) -0.004(2) 
C7 0.026(3) 0.030(3) 0.032(3) -0.003(2) 0.006(2) 0.000(2) 
C8 0.023(3) 0.022(2) 0.025(3) 0.001(2) 0.000(2) 0.002(2) 
C9 0.018(2) 0.024(2) 0.023(3) 0.003(2) 0.003(2) -0.002(2) 
C10 0.029(3) 0.026(3) 0.028(3) -0.003(2) 0.004(2) 0.000(2) 
C11 0.023(3) 0.028(3) 0.025(3) 0.005(2) 0.008(2) 0.005(2) 
C12 0.015(2) 0.031(3) 0.026(3) 0.008(2) 0.006(2) -0.002(2) 
C13 0.020(2) 0.024(3) 0.027(3) 0.000(2) 0.000(2) 0.000(2) 
C14 0.034(4) 0.037(4) 0.058(5) -0.008(3) 0.009(3) -0.016(3) 
C15 0.034(3) 0.038(4) 0.036(3) -0.004(3) 0.018(3) -0.001(3) 
C16 0.014(2) 0.020(2) 0.025(3) -0.004(2) 0.002(2) -0.0043(19) 
C17 0.015(2) 0.020(2) 0.027(3) -0.002(2) 0.001(2) -0.0020(19) 
C18 0.019(2) 0.022(2) 0.024(3) -0.0031(19) 0.004(2) 0.003(2) 
C19 0.021(2) 0.023(2) 0.023(2) -0.006(2) 0.002(2) 0.002(2) 
C20 0.019(2) 0.029(3) 0.027(3) -0.009(2) 0.000(2) 0.003(2) 
C21 0.024(3) 0.035(3) 0.017(3) -0.001(2) -0.002(2) 0.005(2) 
C22 0.028(3) 0.022(2) 0.025(3) -0.001(2) 0.007(2) 0.006(2) 
C23 0.022(3) 0.020(3) 0.029(3) -0.004(2) 0.001(2) 0.001(2) 
C24 0.041(3) 0.026(3) 0.028(3) -0.002(2) 0.006(3) 0.002(3) 
C25 0.027(3) 0.061(4) 0.027(3) -0.009(3) 0.004(2) -0.008(3) 
C26 0.035(3) 0.051(3) 0.024(3) -0.010(3) 0.002(2) -0.016(3) 
C27 0.025(3) 0.051(4) 0.026(3) -0.009(2) 0.006(2) -0.009(3) 
 
_geom_special_details 
; 
 All esds (except the esd in the dihedral angle between two l.s. planes) 
 are estimated using the full covariance matrix.  The cell esds are taken 
 into account individually in the estimation of esds in distances, angles 
 and torsion angles; correlations between esds in cell parameters are only 
 used when they are defined by crystal symmetry.  An approximate (isotropic) 
 treatment of cell esds is used for estimating esds involving l.s. planes. 
; 
 
loop_ 
 _geom_bond_atom_site_label_1 
 _geom_bond_atom_site_label_2 
 _geom_bond_distance 
 _geom_bond_site_symmetry_2 
 _geom_bond_publ_flag 
Re1 C2 1.919(5) . ? 
Re1 C1 1.924(5) . ? 
Re1 C3 1.973(5) . ? 
Re1 C16 2.138(5) . ? 
Re1 N1 2.182(4) . ? 
Re1 N2 2.185(4) . ? 
O1 C1 1.153(6) . ? 
O2 C2 1.146(6) . ? 
O3 C3 1.142(6) . ? 
N1 C8 1.352(6) . ? 
N1 C4 1.356(6) . ? 
N2 C13 1.336(6) . ? 
N2 C9 1.356(6) . ? 
N3 C19 1.398(6) . ? 
N3 H3NA 0.80(6) . ? 
N3 H3NB 0.76(5) . ? 
N4 C27 1.342(6) . ? 
N4 N5 1.358(6) . ? 
N4 C20 1.440(6) . ? 
N5 C25 1.329(7) . ? 
C4 C5 1.391(7) . ? 
C4 H4 0.88(4) . ? 
C5 C6 1.397(7) . ? 
C5 H5 1.00(4) . ? 
C6 C7 1.385(7) . ? 
C6 C14 1.485(8) . ? 
C7 C8 1.384(7) . ? 
C7 H7 0.96(6) . ? 
C8 C9 1.470(6) . ? 
C9 C10 1.385(7) . ? 
C10 C11 1.391(7) . ? 
C10 H10 0.87(5) . ? 
C11 C12 1.382(7) . ? 
C11 C15 1.499(7) . ? 
C12 C13 1.377(7) . ? 
C12 H12 0.86(5) . ? 
C13 H13 1.02(4) . ? 
C14 H14A 0.90(9) . ? 
C14 H14B 0.88(7) . ? 
C14 H14C 0.90(7) . ? 
C15 H15A 0.87(8) . ? 
C15 H15B 0.89(6) . ? 
C15 H15C 0.86(7) . ? 
C16 C17 1.197(6) . ? 
C17 C18 1.436(6) . ? 
C18 C23 1.404(7) . ? 
C18 C19 1.412(6) . ? 
C19 C20 1.401(7) . ? 
C20 C21 1.385(7) . ? 
C21 C22 1.380(7) . ? 
C21 H21 0.85(5) . ? 
C22 C23 1.391(7) . ? 
C22 C24 1.495(7) . ? 
C23 H23 0.80(4) . ? 
C24 H24A 0.83(6) . ? 
C24 H24B 0.97(8) . ? 
C24 H24C 0.99(7) . ? 
C25 C26 1.389(8) . ? 
C25 H25 0.96(6) . ? 
C26 C27 1.358(7) . ? 
C26 H26 0.93(5) . ? 
C27 H27 0.83(5) . ? 
 
loop_ 
 _geom_angle_atom_site_label_1 
 _geom_angle_atom_site_label_2 
 _geom_angle_atom_site_label_3 
 _geom_angle 
 _geom_angle_site_symmetry_1 
 _geom_angle_site_symmetry_3 
 _geom_angle_publ_flag 
C2 Re1 C1 88.7(2) . . ? 
C2 Re1 C3 89.0(2) . . ? 
C1 Re1 C3 91.53(19) . . ? 
C2 Re1 C16 94.22(18) . . ? 
C1 Re1 C16 91.35(18) . . ? 
C3 Re1 C16 175.72(18) . . ? 
C2 Re1 N1 98.48(17) . . ? 
C1 Re1 N1 172.01(17) . . ? 
C3 Re1 N1 92.07(17) . . ? 
C16 Re1 N1 84.67(15) . . ? 
C2 Re1 N2 172.27(17) . . ? 
C1 Re1 N2 98.34(18) . . ? 
C3 Re1 N2 93.95(17) . . ? 
C16 Re1 N2 82.51(15) . . ? 
N1 Re1 N2 74.30(14) . . ? 
C8 N1 C4 118.6(4) . . ? 
C8 N1 Re1 117.3(3) . . ? 
C4 N1 Re1 124.1(3) . . ? 
C13 N2 C9 118.2(4) . . ? 
C13 N2 Re1 124.5(3) . . ? 
C9 N2 Re1 117.3(3) . . ? 
C19 N3 H3NA 114(4) . . ? 
C19 N3 H3NB 114(3) . . ? 
H3NA N3 H3NB 106(5) . . ? 
C27 N4 N5 111.2(4) . . ? 
C27 N4 C20 128.8(4) . . ? 
N5 N4 C20 120.0(4) . . ? 
C25 N5 N4 104.2(4) . . ? 
O1 C1 Re1 177.5(4) . . ? 
O2 C2 Re1 178.2(4) . . ? 
O3 C3 Re1 177.7(4) . . ? 
N1 C4 C5 121.3(5) . . ? 
N1 C4 H4 112(3) . . ? 
C5 C4 H4 127(3) . . ? 
C4 C5 C6 120.7(5) . . ? 
C4 C5 H5 119(3) . . ? 
C6 C5 H5 120(3) . . ? 
C7 C6 C5 116.4(5) . . ? 
C7 C6 C14 121.9(5) . . ? 
C5 C6 C14 121.7(5) . . ? 
C8 C7 C6 121.3(5) . . ? 
C8 C7 H7 120(3) . . ? 
C6 C7 H7 119(3) . . ? 
N1 C8 C7 121.5(4) . . ? 
N1 C8 C9 115.7(4) . . ? 
C7 C8 C9 122.8(4) . . ? 
N2 C9 C10 121.1(4) . . ? 
N2 C9 C8 115.3(4) . . ? 
C10 C9 C8 123.5(4) . . ? 
C9 C10 C11 120.8(5) . . ? 
C9 C10 H10 119(3) . . ? 
C11 C10 H10 120(3) . . ? 
C12 C11 C10 117.0(4) . . ? 
C12 C11 C15 122.2(5) . . ? 
C10 C11 C15 120.9(5) . . ? 
C13 C12 C11 120.0(5) . . ? 
C13 C12 H12 121(3) . . ? 
C11 C12 H12 119(3) . . ? 
N2 C13 C12 123.0(4) . . ? 
N2 C13 H13 112(2) . . ? 
C12 C13 H13 125(2) . . ? 
C6 C14 H14A 119(6) . . ? 
C6 C14 H14B 105(4) . . ? 
H14A C14 H14B 100(7) . . ? 
C6 C14 H14C 113(4) . . ? 
H14A C14 H14C 109(7) . . ? 
H14B C14 H14C 110(6) . . ? 
C11 C15 H15A 111(5) . . ? 
C11 C15 H15B 114(4) . . ? 
H15A C15 H15B 119(6) . . ? 
C11 C15 H15C 109(4) . . ? 
H15A C15 H15C 96(6) . . ? 
H15B C15 H15C 107(6) . . ? 
C17 C16 Re1 173.4(4) . . ? 
C16 C17 C18 169.7(5) . . ? 
C23 C18 C19 118.8(4) . . ? 
C23 C18 C17 123.4(4) . . ? 
C19 C18 C17 117.9(4) . . ? 
N3 C19 C20 121.4(4) . . ? 
N3 C19 C18 120.5(4) . . ? 
C20 C19 C18 118.0(4) . . ? 
C21 C20 C19 121.5(4) . . ? 
C21 C20 N4 119.8(4) . . ? 
C19 C20 N4 118.7(4) . . ? 
C22 C21 C20 121.4(5) . . ? 
C22 C21 H21 119(3) . . ? 
C20 C21 H21 119(3) . . ? 
C21 C22 C23 117.5(5) . . ? 
C21 C22 C24 122.3(5) . . ? 
C23 C22 C24 120.1(5) . . ? 
C22 C23 C18 122.7(5) . . ? 
C22 C23 H23 119(3) . . ? 
C18 C23 H23 119(3) . . ? 
C22 C24 H24A 116(4) . . ? 
C22 C24 H24B 117(4) . . ? 
H24A C24 H24B 109(6) . . ? 
C22 C24 H24C 107(4) . . ? 
H24A C24 H24C 100(5) . . ? 
H24B C24 H24C 106(6) . . ? 
N5 C25 C26 112.1(5) . . ? 
N5 C25 H25 117(3) . . ? 
C26 C25 H25 131(3) . . ? 
C27 C26 C25 104.4(5) . . ? 
C27 C26 H26 130(3) . . ? 
C25 C26 H26 125(3) . . ? 
N4 C27 C26 108.1(5) . . ? 
N4 C27 H27 120(3) . . ? 
C26 C27 H27 132(3) . . ? 
 
_diffrn_measured_fraction_theta_max    0.972 
_diffrn_reflns_theta_full              66.14 
_diffrn_measured_fraction_theta_full   0.972 
_refine_diff_density_max    1.245 
_refine_diff_density_min   -0.716 
_refine_diff_density_rms    0.093 

#===END

  
data_bpyReC2Arpz6 
  
_audit_creation_method            SHELXL-97 
_chemical_name_systematic 
; 
 ? 
; 
_chemical_name_common             ? 
_chemical_melting_point           ? 
_chemical_formula_moiety          ? 
_chemical_formula_sum 
 'C45 H37 N14 O5 Re' 
_chemical_formula_weight          1040.09 
  
loop_ 
 _atom_type_symbol 
 _atom_type_description 
 _atom_type_scat_dispersion_real 
 _atom_type_scat_dispersion_imag 
 _atom_type_scat_source 
 'C'  'C'   0.0033   0.0016 
 'International Tables Vol C Tables 4.2.6.8 and 6.1.1.4' 
 'H'  'H'   0.0000   0.0000 
 'International Tables Vol C Tables 4.2.6.8 and 6.1.1.4' 
 'N'  'N'   0.0061   0.0033 
 'International Tables Vol C Tables 4.2.6.8 and 6.1.1.4' 
 'O'  'O'   0.0106   0.0060 
 'International Tables Vol C Tables 4.2.6.8 and 6.1.1.4' 
 'Re'  'Re'  -1.0185   7.2310 
 'International Tables Vol C Tables 4.2.6.8 and 6.1.1.4' 
  
_symmetry_cell_setting            Monoclinic 
_symmetry_space_group_name_H-M    P2(1)/c 
  
loop_ 
 _symmetry_equiv_pos_as_xyz 
 'x, y, z' 
 '-x, y+1/2, -z+1/2' 
 '-x, -y, -z' 
 'x, -y-1/2, z-1/2' 
  
_cell_length_a                    18.2497(7) 
_cell_length_b                    10.8047(4) 
_cell_length_c                    23.2347(9) 
_cell_angle_alpha                 90.00 
_cell_angle_beta                  107.3970(10) 
_cell_angle_gamma                 90.00 
_cell_volume                      4371.9(3) 
_cell_formula_units_Z             4 
_cell_measurement_temperature     296(2) 
_cell_measurement_reflns_used     7748 
_cell_measurement_theta_min       2.22 
_cell_measurement_theta_max       24.20 
  
_exptl_crystal_description        Plate 
_exptl_crystal_colour             Yellow 
_exptl_crystal_size_max           0.5 
_exptl_crystal_size_mid           0.15 
_exptl_crystal_size_min           0.01 
_exptl_crystal_density_meas       ? 
_exptl_crystal_density_diffrn     1.580 
_exptl_crystal_density_method     'not measured' 
_exptl_crystal_F_000              2080 
_exptl_absorpt_coefficient_mu     2.843 
_exptl_absorpt_correction_type    multi-scan 
_exptl_absorpt_correction_T_min   0.759 
_exptl_absorpt_correction_T_max   1.000 
_exptl_absorpt_process_details    '(SADABS, Bruker, 1997)' 
  
_exptl_special_details 
; 
 ? 
; 
  
_diffrn_ambient_temperature       296(2) 
_diffrn_radiation_wavelength      0.71073 
_diffrn_radiation_type            MoK\a 
_diffrn_radiation_source          'fine-focus sealed tube' 
_diffrn_radiation_monochromator   graphite 
_diffrn_measurement_device_type   'Bruker SMART APEX CCD diffractometer' 
_diffrn_measurement_method        'omega scans' 
_diffrn_detector_area_resol_mean  ? 
_diffrn_standards_number          ? 
_diffrn_standards_interval_count  ? 
_diffrn_standards_interval_time   ? 
_diffrn_standards_decay_%         <1 
_diffrn_reflns_number             33045 
_diffrn_reflns_av_R_equivalents   0.0358 
_diffrn_reflns_av_sigmaI/netI     0.0461 
_diffrn_reflns_limit_h_min        -20 
_diffrn_reflns_limit_h_max        24 
_diffrn_reflns_limit_k_min        -14 
_diffrn_reflns_limit_k_max        14 
_diffrn_reflns_limit_l_min        -30 
_diffrn_reflns_limit_l_max        30 
_diffrn_reflns_theta_min          1.84 
_diffrn_reflns_theta_max          28.32 
_reflns_number_total              10852 
_reflns_number_gt                 8305 
_reflns_threshold_expression      >2sigma(I) 
  
_computing_data_collection        'SMART V5.625 (Bruker, 2001)' 
_computing_cell_refinement        'SAINT+  V6.2 (Bruker, 2001)' 
_computing_data_reduction         'SAINT+  V6.2' 
_computing_structure_solution     'SHELXS-97 (Sheldrick, 1990)' 
_computing_structure_refinement   'SHELXL-97 (Sheldrick, 1997)' 
_computing_molecular_graphics     'SHELXTL V6.1 (Sheldrick, 1997)' 
_computing_publication_material   'SHELXTL V6.1' 
  
_refine_special_details 
; 
 Refinement of F^2^ against ALL reflections.  The weighted R-factor wR and 
 goodness of fit S are based on F^2^, conventional R-factors R are based 
 on F, with F set to zero for negative F^2^. The threshold expression of 
 F^2^ > 2sigma(F^2^) is used only for calculating R-factors(gt) etc. and is 
 not relevant to the choice of reflections for refinement.  R-factors based 
 on F^2^ are statistically about twice as large as those based on F, and R- 
 factors based on ALL data will be even larger. 
; 
  
_refine_ls_structure_factor_coef  Fsqd 
_refine_ls_matrix_type            full 
_refine_ls_weighting_scheme       calc 
_refine_ls_weighting_details 
 'calc w=1/[\s^2^(Fo^2^)+(0.0552P)^2^+1.7759P] where P=(Fo^2^+2Fc^2^)/3' 
_atom_sites_solution_primary      direct 
_atom_sites_solution_secondary    difmap 
_atom_sites_solution_hydrogens    geom 
_refine_ls_hydrogen_treatment     constr 
_refine_ls_extinction_method      none 
_refine_ls_extinction_coef        ? 
_refine_ls_number_reflns          10852 
_refine_ls_number_parameters      586 
_refine_ls_number_restraints      0 
_refine_ls_R_factor_all           0.0580 
_refine_ls_R_factor_gt            0.0401 
_refine_ls_wR_factor_ref          0.1062 
_refine_ls_wR_factor_gt           0.0978 
_refine_ls_goodness_of_fit_ref    1.021 
_refine_ls_restrained_S_all       1.021 
_refine_ls_shift/su_max           0.008 
_refine_ls_shift/su_mean          0.000 
  
loop_ 
 _atom_site_label 
 _atom_site_type_symbol 
 _atom_site_fract_x 
 _atom_site_fract_y 
 _atom_site_fract_z 
 _atom_site_U_iso_or_equiv 
 _atom_site_adp_type 
 _atom_site_occupancy 
 _atom_site_symmetry_multiplicity 
 _atom_site_calc_flag 
 _atom_site_refinement_flags 
 _atom_site_disorder_assembly 
 _atom_site_disorder_group 
C48 C 0.6706(4) 0.8216(5) 1.0014(3) 0.0739(16) Uani 1 1 d . . . 
H48 H 0.6797 0.8575 0.9678 0.089 Uiso 1 1 calc R . . 
C27 C 0.7687(3) 0.1583(4) 0.93695(18) 0.0465(9) Uani 1 1 d . . . 
H27 H 0.8057 0.1326 0.9194 0.056 Uiso 1 1 calc R . . 
C23 C 0.7346(2) 0.2347(4) 1.02209(17) 0.0445(9) Uani 1 1 d . . . 
H23 H 0.7485 0.2608 1.0621 0.053 Uiso 1 1 calc R . . 
Re1 Re 1.049624(9) 0.192238(14) 1.127077(7) 0.04126(7) Uani 1 1 d . . . 
N2 N 1.0847(2) 0.2023(3) 1.04601(16) 0.0429(8) Uani 1 1 d . . . 
C20 C 0.9353(2) 0.2045(3) 1.06700(18) 0.0415(9) Uani 1 1 d . . . 
C3 C 1.0437(3) 0.0168(4) 1.1351(2) 0.0585(12) Uani 1 1 d . . . 
C22 C 0.7922(2) 0.2009(3) 0.99710(18) 0.0429(9) Uani 1 1 d . . . 
C10 C 1.0844(2) 0.4202(4) 1.06328(18) 0.0435(9) Uani 1 1 d . . . 
C1 C 1.0154(3) 0.2093(4) 1.1967(2) 0.0541(11) Uani 1 1 d . . . 
C2 C 1.1562(3) 0.1769(4) 1.1757(2) 0.0514(11) Uani 1 1 d . . . 
C15 C 1.0992(2) 0.3162(3) 1.02741(19) 0.0450(9) Uani 1 1 d . . . 
C21 C 0.8715(3) 0.2036(3) 1.0332(2) 0.0472(10) Uani 1 1 d . . . 
O3 O 1.0425(3) -0.0882(3) 1.1409(2) 0.1012(15) Uani 1 1 d . . . 
O2 O 1.2187(2) 0.1611(4) 1.20334(19) 0.0815(12) Uani 1 1 d . . . 
O1 O 0.9938(3) 0.2235(4) 1.23818(18) 0.0849(12) Uani 1 1 d . . . 
N1 N 1.06064(19) 0.3887(3) 1.11082(15) 0.0430(7) Uani 1 1 d . . . 
C14 C 1.0458(3) 0.4790(4) 1.1448(2) 0.0546(11) Uani 1 1 d . . . 
H14 H 1.0291 0.4573 1.1775 0.066 Uiso 1 1 calc R . . 
C13 C 1.0540(3) 0.6031(4) 1.1339(2) 0.0643(14) Uani 1 1 d . . . 
H13 H 1.0443 0.6634 1.1592 0.077 Uiso 1 1 calc R . . 
C19 C 1.0952(3) 0.1040(4) 1.0140(2) 0.0555(11) Uani 1 1 d . . . 
H19 H 1.0840 0.0257 1.0257 0.067 Uiso 1 1 calc R . . 
C11 C 1.0926(3) 0.5443(4) 1.0497(2) 0.0578(12) Uani 1 1 d . . . 
H11 H 1.1087 0.5650 1.0165 0.069 Uiso 1 1 calc R . . 
C16 C 1.1268(3) 0.3301(4) 0.9784(2) 0.0589(12) Uani 1 1 d . . . 
H16 H 1.1373 0.4085 0.9663 0.071 Uiso 1 1 calc R . . 
C12 C 1.0770(3) 0.6348(4) 1.0848(2) 0.0629(13) Uani 1 1 d . . . 
H12 H 1.0818 0.7176 1.0757 0.075 Uiso 1 1 calc R . . 
C18 C 1.1214(3) 0.1135(5) 0.9650(2) 0.0660(13) Uani 1 1 d . . . 
H18 H 1.1274 0.0431 0.9438 0.079 Uiso 1 1 calc R . . 
C17 C 1.1384(3) 0.2266(5) 0.9476(2) 0.0647(13) Uani 1 1 d . . . 
H17 H 1.1578 0.2346 0.9150 0.078 Uiso 1 1 calc R . . 
C25 C 0.6375(3) 0.1904(3) 0.93027(18) 0.0463(10) Uani 1 1 d . . . 
H25 H 0.5859 0.1875 0.9077 0.056 Uiso 1 1 calc R . . 
C26 C 0.6931(3) 0.1537(4) 0.90390(18) 0.0472(10) Uani 1 1 d . . . 
C24 C 0.6574(2) 0.2312(3) 0.98973(17) 0.0421(9) Uani 1 1 d . . . 
C28 C 0.5961(3) 0.2634(4) 1.0178(2) 0.0503(10) Uani 1 1 d . . . 
H28A H 0.5507 0.2904 0.9865 0.060 Uiso 1 1 calc R . . 
H28B H 0.5826 0.1897 1.0363 0.060 Uiso 1 1 calc R . . 
C29 C 0.6674(3) 0.1135(4) 0.8382(2) 0.0634(13) Uani 1 1 d . . . 
H29A H 0.7095 0.0718 0.8287 0.076 Uiso 1 1 calc R . . 
H29B H 0.6252 0.0554 0.8317 0.076 Uiso 1 1 calc R . . 
O4 O 0.61867(17) 0.3587(3) 1.06258(12) 0.0489(7) Uani 1 1 d . . . 
O5 O 0.6434(2) 0.2187(3) 0.79908(14) 0.0617(9) Uani 1 1 d . . . 
N5 N 0.6034(2) 0.5702(3) 1.12680(15) 0.0489(8) Uani 1 1 d . . . 
C40 C 0.6530(2) 0.5680(4) 1.08881(16) 0.0424(9) Uani 1 1 d . . . 
N11 N 0.6084(2) 0.3836(3) 0.69909(16) 0.0549(9) Uani 1 1 d . . . 
N9 N 0.6678(2) 0.4827(4) 0.79330(17) 0.0624(10) Uani 1 1 d . . . 
C30 C 0.6249(3) 0.4756(4) 1.03708(17) 0.0473(10) Uani 1 1 d . . . 
H30A H 0.5754 0.5011 1.0105 0.057 Uiso 1 1 calc R . . 
H30B H 0.6610 0.4714 1.0138 0.057 Uiso 1 1 calc R . . 
C50 C 0.6786(3) 0.3930(4) 0.74924(19) 0.0530(11) Uani 1 1 d . . . 
C31 C 0.7028(3) 0.2692(4) 0.7800(2) 0.0546(11) Uani 1 1 d . . . 
H31A H 0.7159 0.2127 0.7521 0.066 Uiso 1 1 calc R . . 
H31B H 0.7480 0.2803 0.8145 0.066 Uiso 1 1 calc R . . 
N7 N 0.6535(2) 0.6907(3) 1.06230(17) 0.0507(9) Uani 1 1 d . . . 
N3 N 0.73051(19) 0.5368(3) 1.12701(14) 0.0457(8) Uani 1 1 d . . . 
N13 N 0.7404(2) 0.4374(3) 0.72634(17) 0.0562(9) Uani 1 1 d . . . 
C47 C 0.6694(3) 0.7041(4) 1.01014(18) 0.0488(10) Uani 1 1 d . . . 
H47 H 0.6778 0.6416 0.9853 0.059 Uiso 1 1 calc R . . 
C44 C 0.5266(2) 0.5665(4) 1.10174(18) 0.0478(10) Uani 1 1 d . . . 
H44 H 0.4999 0.5552 1.0612 0.057 Uiso 1 1 calc R . . 
C41 C 0.7868(2) 0.6196(4) 1.13964(19) 0.0515(11) Uani 1 1 d . . . 
H41 H 0.7849 0.7012 1.1266 0.062 Uiso 1 1 calc R . . 
C57 C 0.7632(3) 0.3673(4) 0.6882(2) 0.0606(13) Uani 1 1 d . . . 
H57 H 0.7453 0.2888 0.6746 0.073 Uiso 1 1 calc R . . 
N4 N 0.7529(3) 0.4247(4) 1.1557(2) 0.0813(14) Uani 1 1 d . . . 
N8 N 0.6459(4) 0.8016(4) 1.0875(3) 0.0982(18) Uani 1 1 d . . . 
C43 C 0.8290(3) 0.4404(5) 1.1873(2) 0.0675(14) Uani 1 1 d . . . 
H43 H 0.8617 0.3827 1.2117 0.081 Uiso 1 1 calc R . . 
C45 C 0.4976(3) 0.5818(5) 1.1459(3) 0.0727(15) Uani 1 1 d . . . 
H45 H 0.4452 0.5834 1.1413 0.087 Uiso 1 1 calc R . . 
C54 C 0.5841(3) 0.4798(4) 0.6624(2) 0.0658(14) Uani 1 1 d . . . 
H54 H 0.6053 0.5587 0.6658 0.079 Uiso 1 1 calc R . . 
C58 C 0.8151(3) 0.4296(5) 0.6737(2) 0.0751(15) Uani 1 1 d . . . 
H58 H 0.8418 0.4003 0.6481 0.090 Uiso 1 1 calc R . . 
N14 N 0.7752(3) 0.5502(5) 0.7346(3) 0.1034(18) Uani 1 1 d . . . 
C51 C 0.7152(3) 0.4799(5) 0.8493(2) 0.0661(14) Uani 1 1 d . . . 
H51 H 0.7523 0.4203 0.8658 0.079 Uiso 1 1 calc R . . 
C46 C 0.5549(4) 0.5959(6) 1.2015(3) 0.0786(16) Uani 1 1 d . . . 
H46 H 0.5479 0.6077 1.2392 0.094 Uiso 1 1 calc R . . 
C56 C 0.5098(4) 0.3180(6) 0.6267(2) 0.0761(16) Uani 1 1 d . . . 
H56 H 0.4711 0.2700 0.6014 0.091 Uiso 1 1 calc R . . 
N12 N 0.5649(3) 0.2808(5) 0.6785(2) 0.0882(15) Uani 1 1 d . . . 
N6 N 0.6239(3) 0.5882(5) 1.1885(2) 0.0890(15) Uani 1 1 d . . . 
C55 C 0.5240(4) 0.4389(7) 0.6207(2) 0.088(2) Uani 1 1 d . . . 
H55 H 0.4940 0.4883 0.5898 0.105 Uiso 1 1 calc R . . 
C42 C 0.8465(3) 0.5589(6) 1.1753(3) 0.0806(17) Uani 1 1 d . . . 
H42 H 0.8952 0.5934 1.1905 0.097 Uiso 1 1 calc R . . 
C59 C 0.8268(4) 0.5452(6) 0.7007(3) 0.0793(16) Uani 1 1 d . . . 
H59 H 0.8613 0.6059 0.6970 0.095 Uiso 1 1 calc R . . 
C49 C 0.6567(4) 0.8878(5) 1.0476(3) 0.089(2) Uani 1 1 d . . . 
H49 H 0.6550 0.9735 1.0511 0.107 Uiso 1 1 calc R . . 
N10 N 0.6220(4) 0.5874(5) 0.7827(3) 0.1096(19) Uani 1 1 d . . . 
C52 C 0.6995(4) 0.5758(7) 0.8760(3) 0.097(2) Uani 1 1 d . . . 
H52 H 0.7231 0.5942 0.9165 0.116 Uiso 1 1 calc R . . 
C53 C 0.6438(5) 0.6480(7) 0.8378(4) 0.102(2) Uani 1 1 d . . . 
H53 H 0.6247 0.7226 0.8471 0.122 Uiso 1 1 calc R . . 
  
loop_ 
 _atom_site_aniso_label 
 _atom_site_aniso_U_11 
 _atom_site_aniso_U_22 
 _atom_site_aniso_U_33 
 _atom_site_aniso_U_23 
 _atom_site_aniso_U_13 
 _atom_site_aniso_U_12 
C48 0.077(4) 0.067(3) 0.066(3) 0.024(3) 0.004(3) -0.006(3) 
C27 0.054(3) 0.042(2) 0.046(2) 0.0049(17) 0.0181(19) 0.0014(18) 
C23 0.049(2) 0.045(2) 0.0363(19) 0.0009(16) 0.0075(17) 0.0012(18) 
Re1 0.03989(10) 0.03468(9) 0.04542(10) 0.00636(6) 0.00696(7) 0.00094(6) 
N2 0.0376(19) 0.0366(16) 0.0518(19) 0.0007(13) 0.0092(15) 0.0005(13) 
C20 0.040(2) 0.042(2) 0.042(2) 0.0057(16) 0.0119(17) -0.0022(16) 
C3 0.057(3) 0.045(2) 0.065(3) 0.013(2) 0.004(2) -0.003(2) 
C22 0.042(2) 0.0387(19) 0.045(2) 0.0094(16) 0.0089(17) 0.0027(16) 
C10 0.038(2) 0.0388(19) 0.051(2) 0.0024(17) 0.0089(17) -0.0019(16) 
C1 0.050(3) 0.058(3) 0.053(3) 0.012(2) 0.013(2) 0.005(2) 
C2 0.052(3) 0.044(2) 0.051(2) 0.0044(17) 0.005(2) 0.0014(19) 
C15 0.040(2) 0.041(2) 0.051(2) 0.0006(16) 0.0085(18) 0.0000(17) 
C21 0.047(3) 0.046(2) 0.050(2) 0.0070(17) 0.017(2) 0.0012(18) 
O3 0.133(4) 0.0370(19) 0.114(3) 0.0131(19) 0.007(3) -0.009(2) 
O2 0.050(2) 0.084(2) 0.094(3) 0.005(2) -0.006(2) 0.0041(19) 
O1 0.085(3) 0.108(3) 0.070(2) 0.017(2) 0.036(2) 0.017(2) 
N1 0.0419(19) 0.0383(16) 0.0461(17) 0.0032(14) 0.0092(15) 0.0011(14) 
C14 0.066(3) 0.043(2) 0.057(2) 0.0017(19) 0.022(2) 0.002(2) 
C13 0.073(4) 0.036(2) 0.082(4) -0.003(2) 0.019(3) 0.005(2) 
C19 0.056(3) 0.042(2) 0.068(3) -0.002(2) 0.017(2) 0.0025(19) 
C11 0.067(3) 0.042(2) 0.066(3) 0.006(2) 0.024(2) -0.005(2) 
C16 0.063(3) 0.058(3) 0.061(3) 0.004(2) 0.027(2) -0.009(2) 
C12 0.072(3) 0.032(2) 0.083(3) 0.004(2) 0.021(3) -0.002(2) 
C18 0.075(4) 0.059(3) 0.070(3) -0.016(2) 0.031(3) -0.002(3) 
C17 0.072(4) 0.069(3) 0.061(3) -0.009(2) 0.031(3) -0.008(3) 
C25 0.047(2) 0.041(2) 0.044(2) 0.0009(16) 0.0032(18) -0.0049(17) 
C26 0.060(3) 0.0392(19) 0.040(2) 0.0047(16) 0.0111(19) -0.0028(19) 
C24 0.044(2) 0.0380(18) 0.043(2) 0.0017(16) 0.0098(17) -0.0031(17) 
C28 0.047(3) 0.047(2) 0.056(2) -0.0052(19) 0.014(2) -0.0054(19) 
C29 0.081(4) 0.056(3) 0.049(2) -0.002(2) 0.013(2) -0.011(2) 
O4 0.0550(19) 0.0434(14) 0.0494(16) 0.0001(12) 0.0175(14) -0.0026(14) 
O5 0.060(2) 0.077(2) 0.0456(17) 0.0121(15) 0.0125(15) -0.0008(17) 
N5 0.048(2) 0.056(2) 0.0416(18) -0.0028(15) 0.0109(15) 0.0018(17) 
C40 0.042(2) 0.045(2) 0.0373(19) 0.0023(16) 0.0078(16) 0.0025(17) 
N11 0.060(2) 0.057(2) 0.0444(19) -0.0040(16) 0.0105(17) 0.0005(18) 
N9 0.068(3) 0.064(2) 0.056(2) -0.0146(18) 0.021(2) 0.007(2) 
C30 0.052(3) 0.046(2) 0.040(2) -0.0006(17) 0.0087(18) 0.0038(19) 
C50 0.062(3) 0.052(2) 0.047(2) -0.0056(18) 0.018(2) -0.002(2) 
C31 0.053(3) 0.060(3) 0.048(2) 0.000(2) 0.011(2) 0.001(2) 
N7 0.055(2) 0.0395(18) 0.051(2) 0.0045(14) 0.0060(17) 0.0029(16) 
N3 0.0402(19) 0.0478(18) 0.0442(17) 0.0058(14) 0.0049(14) 0.0010(15) 
N13 0.060(2) 0.050(2) 0.059(2) -0.0052(17) 0.0201(19) -0.0064(18) 
C47 0.062(3) 0.042(2) 0.040(2) 0.0078(16) 0.0110(19) -0.0030(19) 
C44 0.029(2) 0.072(3) 0.038(2) 0.0042(19) 0.0028(16) 0.0070(19) 
C41 0.035(2) 0.051(2) 0.059(2) 0.0106(19) 0.0000(19) -0.0100(18) 
C57 0.082(4) 0.044(2) 0.074(3) -0.019(2) 0.051(3) -0.015(2) 
N4 0.088(4) 0.077(3) 0.067(3) 0.007(2) 0.005(2) 0.022(3) 
N8 0.126(5) 0.063(3) 0.101(4) 0.002(3) 0.027(4) 0.013(3) 
C43 0.053(3) 0.082(4) 0.057(3) 0.000(3) 0.000(2) 0.020(3) 
C45 0.051(3) 0.083(4) 0.085(4) 0.017(3) 0.022(3) 0.012(3) 
C54 0.089(4) 0.041(2) 0.056(3) 0.006(2) 0.003(3) 0.008(2) 
C58 0.082(4) 0.079(4) 0.070(3) -0.003(3) 0.032(3) 0.003(3) 
N14 0.104(4) 0.093(4) 0.110(4) -0.019(3) 0.027(4) -0.029(3) 
C51 0.066(3) 0.079(3) 0.046(2) -0.021(2) 0.004(2) 0.007(3) 
C46 0.088(4) 0.097(4) 0.064(3) 0.001(3) 0.044(3) 0.010(3) 
C56 0.058(3) 0.111(5) 0.053(3) 0.009(3) 0.006(2) -0.012(3) 
N12 0.080(4) 0.106(4) 0.077(3) -0.001(3) 0.021(3) -0.022(3) 
N6 0.101(4) 0.104(4) 0.058(3) -0.007(2) 0.018(3) 0.006(3) 
C55 0.093(5) 0.106(5) 0.056(3) 0.018(3) 0.010(3) 0.041(4) 
C42 0.044(3) 0.100(4) 0.085(4) 0.003(3) -0.001(3) -0.010(3) 
C59 0.079(4) 0.085(4) 0.080(4) -0.004(3) 0.034(3) -0.022(3) 
C49 0.120(6) 0.044(3) 0.096(4) 0.018(3) 0.022(4) 0.005(3) 
N10 0.110(5) 0.098(4) 0.132(5) -0.032(4) 0.053(4) 0.004(4) 
C52 0.081(5) 0.131(6) 0.078(4) -0.046(4) 0.024(3) -0.021(4) 
C53 0.104(6) 0.100(5) 0.114(6) -0.060(4) 0.053(5) -0.011(4) 
  
_geom_special_details 
; 
 All esds (except the esd in the dihedral angle between two l.s. planes) 
 are estimated using the full covariance matrix.  The cell esds are taken 
 into account individually in the estimation of esds in distances, angles 
 and torsion angles; correlations between esds in cell parameters are only 
 used when they are defined by crystal symmetry.  An approximate (isotropic) 
 treatment of cell esds is used for estimating esds involving l.s. planes. 
; 
  
loop_ 
 _geom_bond_atom_site_label_1 
 _geom_bond_atom_site_label_2 
 _geom_bond_distance 
 _geom_bond_site_symmetry_2 
 _geom_bond_publ_flag 
C48 C47 1.287(6) . ? 
C48 C49 1.376(9) . ? 
C27 C26 1.365(6) . ? 
C27 C22 1.411(6) . ? 
C23 C24 1.385(6) . ? 
C23 C22 1.393(6) . ? 
Re1 C1 1.908(5) . ? 
Re1 C3 1.911(5) . ? 
Re1 C2 1.943(5) . ? 
Re1 C20 2.140(4) . ? 
Re1 N2 2.166(4) . ? 
Re1 N1 2.176(3) . ? 
N2 C19 1.343(5) . ? 
N2 C15 1.356(5) . ? 
C20 C21 1.193(6) . ? 
C3 O3 1.143(6) . ? 
C22 C21 1.441(6) . ? 
C10 N1 1.346(5) . ? 
C10 C11 1.396(5) . ? 
C10 C15 1.471(6) . ? 
C1 O1 1.156(6) . ? 
C2 O2 1.142(6) . ? 
C15 C16 1.384(7) . ? 
N1 C14 1.332(6) . ? 
C14 C13 1.380(6) . ? 
C13 C12 1.370(7) . ? 
C19 C18 1.364(7) . ? 
C11 C12 1.358(7) . ? 
C16 C17 1.377(7) . ? 
C18 C17 1.352(7) . ? 
C25 C24 1.391(6) . ? 
C25 C26 1.391(6) . ? 
C26 C29 1.520(6) . ? 
C24 C28 1.495(6) . ? 
C28 O4 1.433(5) . ? 
C29 O5 1.439(5) . ? 
O4 C30 1.414(5) . ? 
O5 C31 1.398(6) . ? 
N5 C44 1.349(5) . ? 
N5 N6 1.383(5) . ? 
N5 C40 1.441(5) . ? 
C40 N7 1.463(5) . ? 
C40 N3 1.467(5) . ? 
C40 C30 1.528(5) . ? 
N11 C54 1.333(5) . ? 
N11 N12 1.366(6) . ? 
N11 C50 1.454(6) . ? 
N9 C51 1.330(6) . ? 
N9 N10 1.385(6) . ? 
N9 C50 1.465(5) . ? 
C50 N13 1.464(6) . ? 
C50 C31 1.519(6) . ? 
N7 C47 1.336(6) . ? 
N7 N8 1.359(6) . ? 
N3 C41 1.327(5) . ? 
N3 N4 1.385(5) . ? 
N13 C57 1.324(5) . ? 
N13 N14 1.362(6) . ? 
C44 C45 1.297(7) . ? 
C41 C42 1.328(7) . ? 
C57 C58 1.286(7) . ? 
N4 C43 1.374(7) . ? 
N8 C49 1.369(8) . ? 
C43 C42 1.369(8) . ? 
C45 C46 1.407(8) . ? 
C54 C55 1.304(8) . ? 
C58 C59 1.385(8) . ? 
N14 C59 1.398(8) . ? 
C51 C52 1.283(8) . ? 
C46 N6 1.383(8) . ? 
C56 C55 1.347(8) . ? 
C56 N12 1.377(7) . ? 
N10 C53 1.385(8) . ? 
C52 C53 1.375(10) . ? 
  
loop_ 
 _geom_angle_atom_site_label_1 
 _geom_angle_atom_site_label_2 
 _geom_angle_atom_site_label_3 
 _geom_angle 
 _geom_angle_site_symmetry_1 
 _geom_angle_site_symmetry_3 
 _geom_angle_publ_flag 
C47 C48 C49 112.0(5) . . ? 
C26 C27 C22 121.7(4) . . ? 
C24 C23 C22 122.5(4) . . ? 
C1 Re1 C3 88.3(2) . . ? 
C1 Re1 C2 92.3(2) . . ? 
C3 Re1 C2 86.25(18) . . ? 
C1 Re1 C20 92.56(18) . . ? 
C3 Re1 C20 93.01(16) . . ? 
C2 Re1 C20 175.07(17) . . ? 
C1 Re1 N2 171.38(16) . . ? 
C3 Re1 N2 100.10(17) . . ? 
C2 Re1 N2 90.28(17) . . ? 
C20 Re1 N2 85.05(14) . . ? 
C1 Re1 N1 97.10(16) . . ? 
C3 Re1 N1 174.60(18) . . ? 
C2 Re1 N1 93.19(15) . . ? 
C20 Re1 N1 87.09(13) . . ? 
N2 Re1 N1 74.53(13) . . ? 
C19 N2 C15 117.9(4) . . ? 
C19 N2 Re1 124.8(3) . . ? 
C15 N2 Re1 117.3(3) . . ? 
C21 C20 Re1 176.0(3) . . ? 
O3 C3 Re1 177.9(4) . . ? 
C23 C22 C27 117.1(4) . . ? 
C23 C22 C21 120.2(4) . . ? 
C27 C22 C21 122.6(4) . . ? 
N1 C10 C11 120.7(4) . . ? 
N1 C10 C15 115.6(3) . . ? 
C11 C10 C15 123.7(4) . . ? 
O1 C1 Re1 177.7(4) . . ? 
O2 C2 Re1 176.1(4) . . ? 
N2 C15 C16 120.9(4) . . ? 
N2 C15 C10 115.2(4) . . ? 
C16 C15 C10 123.9(4) . . ? 
C20 C21 C22 174.9(5) . . ? 
C14 N1 C10 118.3(4) . . ? 
C14 N1 Re1 124.5(3) . . ? 
C10 N1 Re1 117.2(3) . . ? 
N1 C14 C13 123.3(5) . . ? 
C12 C13 C14 118.2(5) . . ? 
N2 C19 C18 123.1(4) . . ? 
C12 C11 C10 120.0(5) . . ? 
C17 C16 C15 119.4(4) . . ? 
C11 C12 C13 119.4(4) . . ? 
C17 C18 C19 119.1(4) . . ? 
C18 C17 C16 119.6(5) . . ? 
C24 C25 C26 121.2(4) . . ? 
C27 C26 C25 119.4(4) . . ? 
C27 C26 C29 122.1(4) . . ? 
C25 C26 C29 118.5(4) . . ? 
C23 C24 C25 118.0(4) . . ? 
C23 C24 C28 121.9(4) . . ? 
C25 C24 C28 120.0(4) . . ? 
O4 C28 C24 113.2(3) . . ? 
O5 C29 C26 110.6(4) . . ? 
C30 O4 C28 112.3(3) . . ? 
C31 O5 C29 113.0(4) . . ? 
C44 N5 N6 112.1(4) . . ? 
C44 N5 C40 119.8(3) . . ? 
N6 N5 C40 127.8(4) . . ? 
N5 C40 N7 109.1(3) . . ? 
N5 C40 N3 107.5(3) . . ? 
N7 C40 N3 109.7(3) . . ? 
N5 C40 C30 111.6(3) . . ? 
N7 C40 C30 107.7(3) . . ? 
N3 C40 C30 111.2(3) . . ? 
C54 N11 N12 111.2(4) . . ? 
C54 N11 C50 120.2(4) . . ? 
N12 N11 C50 128.1(4) . . ? 
C51 N9 N10 112.0(4) . . ? 
C51 N9 C50 119.0(4) . . ? 
N10 N9 C50 128.1(4) . . ? 
O4 C30 C40 107.7(3) . . ? 
N11 C50 N13 108.7(4) . . ? 
N11 C50 N9 109.7(4) . . ? 
N13 C50 N9 108.4(4) . . ? 
N11 C50 C31 112.2(4) . . ? 
N13 C50 C31 108.2(4) . . ? 
N9 C50 C31 109.6(4) . . ? 
O5 C31 C50 110.4(4) . . ? 
C47 N7 N8 111.9(4) . . ? 
C47 N7 C40 120.7(3) . . ? 
N8 N7 C40 127.1(4) . . ? 
C41 N3 N4 112.7(4) . . ? 
C41 N3 C40 121.5(3) . . ? 
N4 N3 C40 125.8(4) . . ? 
C57 N13 N14 112.3(4) . . ? 
C57 N13 C50 119.1(4) . . ? 
N14 N13 C50 128.3(4) . . ? 
C48 C47 N7 105.6(5) . . ? 
C45 C44 N5 105.8(4) . . ? 
N3 C41 C42 104.0(4) . . ? 
C58 C57 N13 106.2(4) . . ? 
C43 N4 N3 104.7(4) . . ? 
N7 N8 C49 104.8(6) . . ? 
C42 C43 N4 105.5(4) . . ? 
C44 C45 C46 112.0(5) . . ? 
C55 C54 N11 104.9(5) . . ? 
C57 C58 C59 112.3(5) . . ? 
N13 N14 C59 104.5(5) . . ? 
C52 C51 N9 106.3(5) . . ? 
N6 C46 C45 105.5(5) . . ? 
C55 C56 N12 105.1(5) . . ? 
N11 N12 C56 105.4(5) . . ? 
N5 N6 C46 104.7(5) . . ? 
C54 C55 C56 113.3(5) . . ? 
C41 C42 C43 113.0(5) . . ? 
C58 C59 N14 104.5(5) . . ? 
N8 C49 C48 105.7(5) . . ? 
N9 N10 C53 103.3(6) . . ? 
C51 C52 C53 111.9(6) . . ? 
C52 C53 N10 106.4(6) . . ? 
  
_diffrn_measured_fraction_theta_max    0.996 
_diffrn_reflns_theta_full              28.32 
_diffrn_measured_fraction_theta_full   0.996 
_refine_diff_density_max    1.655 
_refine_diff_density_min   -0.636 
_refine_diff_density_rms    0.102 
